# Supplementary material for: N,N′-Dimethylurea as an efficient ligand for the synthesis of pharma-relevant motifs through Chan–Lam cross-coupling strategy
Source: Royal Society of Chemistry journal article supplement (doi:10.1039/d3ob00176h), 2023-01-01

## ***Supporting information***

### ***N,N'-dimethylurea as an efficient ligand for the synthesis of pharma-relevant motifs through Chan-Lam cross-coupling strategy***

Rakhee Saikia,<sup>a</sup> Sanghamitra Das,<sup>a</sup> Arzu Almin,<sup>a</sup> Abhijit Mahanta,<sup>a,b</sup> Bipul Sarma,<sup>a</sup> Ashim J Thakur,<sup>a</sup> Utpal Bora\*<sup>a</sup>

<sup>a</sup>*Department of Chemical Sciences, Tezpur University, Napaam, Tezpur, Assam 784028, India*

<sup>b</sup>*Department of Chemistry, Digboi College, Tinsukia, Assam-786171, India*

*E-mail: utbora@yahoo.co.in, ubora@tezu.ernet.in*

## Contents:

| <i>Section</i> |                                                                                           | <i>Page No.</i> |
|----------------|-------------------------------------------------------------------------------------------|-----------------|
| 1              | General information                                                                       | S3              |
| 2              | $^1\text{H}$ and $^{13}\text{C}$ NMR spectral analysis of the <i>N</i> -aryl derivatives. | S3-S14          |
| 3              | References                                                                                | S14-S15         |
| 4.1            | $^1\text{H}$ and $^{13}\text{C}$ NMR spectra of <i>N</i> -arylamines                      | S16-S32         |
| 4.2            | $^1\text{H}$ and $^{13}\text{C}$ NMR spectra of 3-arylamino-phenols                       | S33-S43         |
| 4.3            | $^1\text{H}$ and $^{13}\text{C}$ NMR spectra of <i>N</i> -arylamides                      | S44-S56         |
| 4.4            | $^1\text{H}$ and $^{13}\text{C}$ NMR spectra of APIs                                      | S57-S58         |

## 1. General information

All the chemicals used for the reactions were procured commercially and used without further purification. The progress of the reaction was monitored through thin layer chromatography on Merck Kieselgel Silica gel 60F<sub>254</sub> plates using short wave UV light ( $\lambda=254$  nm). The products were purified by column chromatography using Silica gel (60-120 mesh). The identification of the purified products was done by NMR spectroscopy. The <sup>1</sup>H and <sup>13</sup>C NMR spectra were recorded on a 400 MHz JEOL NMR spectrometer (400 MHz for <sup>1</sup>H and 100 MHz for <sup>13</sup>C spectroscopy). Chemical shifts for both <sup>1</sup>H ( $\delta_H$ ) and <sup>13</sup>C ( $\delta_C$ ) NMR are assigned in parts per million (ppm) using TMS (0 ppm) as the internal reference and CDCl<sub>3</sub> and DMSO-*d*<sub>6</sub> as solvent (CDCl<sub>3</sub>:  $\delta_H = 7.25$  ppm and  $\delta_C = 77.1$  ppm; DMSO-*d*<sub>6</sub>:  $\delta_H = 2.5$  ppm, DMSO-*d*<sub>6</sub> absorbed water = 3.3 ppm and  $\delta_C = 40.0$  ppm). The multiplicities of the signals are assigned as: s= singlet, d= doublet, t= triplet, q= quartet, m= multiplet and br= broad. Raw NMR data was processed using MestReNova software. Single crystal X-ray diffractions were collected on a Bruker SMART APEX-II CCD diffractometer using Mo K $\alpha$  ( $\lambda = 0.71073$  Å) radiation.

## 2. <sup>1</sup>H and <sup>13</sup>C NMR spectral analysis of the *N*-aryl derivatives.

### <sup>1</sup>H and <sup>13</sup>C NMR spectral analysis of *N*-arylamines (**3**)

#### Diphenylamine (**3a**)<sup>1</sup>

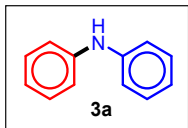

Synthesized as per the general experimental procedure **A**; obtained as a colourless solid, Yield: (101 mg, 80%); mp 55-56 °C; <sup>1</sup>H NMR (400 MHz, DMSO-*d*<sub>6</sub>):  $\delta_H$  (ppm) 6.78 (d,  $J = 8$  Hz, 2H), 7.05 (d,  $J = 8$  Hz, 4H), 7.19 (t,  $J = 8$  Hz, 4H), 8.12 (br s, 1H); <sup>13</sup>C NMR (100 MHz, DMSO-*d*<sub>6</sub>):  $\delta_C$  (ppm) 117.3, 120.1, 129.7, 143.9

#### 3,4-Dimethoxy-*N*-phenylamine (**3b**)<sup>2</sup>

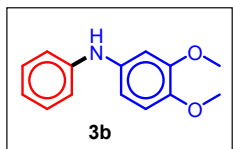

Synthesized as per the general experimental procedure **A**; obtained as a colourless solid, Yield: (154 mg, 90%); mp 98-99 °C; <sup>1</sup>H NMR (400 MHz, DMSO-*d*<sub>6</sub>):  $\delta_H$  (ppm) 3.66 (s, 3H), 3.67 (s, 3H), 6.59 (d,  $J = 8$  Hz, 1H), 6.65-6.69 (m, 2H), 6.81 (d,  $J = 8$  Hz, 1H), 6.91 (d,  $J = 8$  Hz, 2H), 7.12 (t,  $J = 8$  Hz, 2H), 7.81 (br s, 1H); <sup>13</sup>C NMR (100 MHz, DMSO-*d*<sub>6</sub>):  $\delta_C$  (ppm) 55.8, 56.5, 104.7, 110.4, 113.6, 115.7, 118.9, 129.6, 137.3, 143.7, 145.3, 149.9

#### Bis-(4-methoxyphenyl)amine (**3c**)<sup>3</sup>

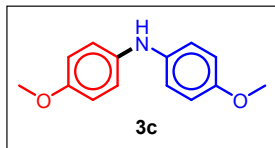

Synthesized as per the general experimental procedure **A**; obtained as a colourless solid, Yield: (146 mg, 85%); mp 100-101 °C;  $^1\text{H}$  NMR (400 MHz,  $\text{DMSO-}d_6$ ):  $\delta_H$  (ppm) 3.64 (s, 6H), 6.76 (d,  $J = 8$  Hz, 4H), 6.87 (d,  $J = 8$  Hz, 4H), 7.46 (br s, 1H);  $^{13}\text{C}$  NMR (100 MHz,  $\text{DMSO-}d_6$ ):  $\delta_C$  (ppm) 55.7, 115.0, 118.5, 138.5, 153.3

#### 4-Ethyl-*N*-phenylamine (**3d**)<sup>4</sup>

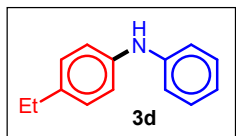

Synthesized as per the general experimental procedure **A**; obtained as a light yellow oil, Yield: (110 mg, 75%);  $^1\text{H}$  NMR (400 MHz,  $\text{DMSO-}d_6$ ):  $\delta_H$  (ppm) 1.11 (t,  $J = 8$  Hz, 3H), 2.48 (q,  $J = 8$  Hz, 2H), 6.70-6.73 (m, 1H), 6.96-6.98 (m, 4H), 7.03 (d,  $J = 8$  Hz, 2H), 7.14 (t,  $J = 8$  Hz, 2H), 7.96 (br s, 1H);  $^{13}\text{C}$  NMR (100 MHz,  $\text{DMSO-}d_6$ ):  $\delta_C$  (ppm) 16.4, 28.0, 116.4, 118.0, 119.5, 128.8, 129.5, 135.8, 141.4, 144.5

#### 2-Methyl-*N*-phenylamine (**3e**)<sup>5</sup>

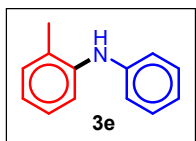

Synthesized as per the general experimental procedure **A**; obtained as a yellow oil, Yield: (50 mg, 40%);  $^1\text{H}$  NMR (400 MHz,  $\text{DMSO-}d_6$ ):  $\delta_H$  (ppm) 2.17 (s, 3H), 6.71-6.73 (m, 1H), 6.86 (d,  $J = 8$  Hz, 3H), 7.06-7.09 (m, 1H), 7.13-7.16 (m, 4H), 7.35 (br s, 1H);  $^{13}\text{C}$  NMR (100 MHz,  $\text{DMSO-}d_6$ ):  $\delta_C$  (ppm) 18.5, 116.5, 119.2, 120.0, 122.3, 126.9, 129.5, 129.8, 131.3, 141.8, 145.4

#### 3-Nitro-*N*-phenylamine (**3f**)<sup>1</sup>

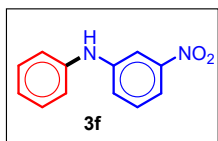

Synthesized as per the general experimental procedure **A**; obtained as a orange solid, Yield: (112 mg, 70%); mp 87-88 °C;  $^1\text{H}$  NMR (400 MHz,  $\text{DMSO-}d_6$ ):  $\delta_H$  (ppm) 6.93 (t,  $J = 8$  Hz, 1H), 7.12 (d,  $J = 8$  Hz, 2H), 7.28 (t,  $J = 8$  Hz, 2H), 7.36-7.43 (m, 2H), 7.53 (d,  $J = 8$  Hz, 1H), 7.75 (s, 1H), 8.69 (br s, 1H);  $^{13}\text{C}$  NMR (100 MHz,  $\text{DMSO-}d_6$ ):  $\delta_C$  (ppm) 109.2, 113.6, 119.2, 121.9, 122.2, 130.0, 130.9, 142.0, 145.8, 149.2

#### *N*<sup>1</sup>,*N*<sup>4</sup>-diphenylbenzene-1,4-diamine (**3g**)<sup>6</sup>

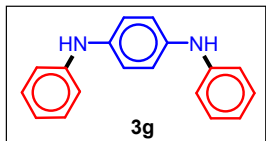

Synthesized as per the general experimental procedure **A**; obtained as a off-white solid, Yield: (98 mg, 50%); mp 147-148 °C; <sup>1</sup>H NMR (400 MHz, DMSO-*d*<sub>6</sub>): δ<sub>H</sub> (ppm) 6.67 (t, *J* = 8 Hz, 2H), 6.91 (d, *J* = 8 Hz, 4H), 6.99 (s, 4H), 7.12 (t, *J* = 8 Hz, 4H), 7.84 (br s, 2H); <sup>13</sup>C NMR (100 MHz, DMSO-*d*<sub>6</sub>): δ<sub>C</sub> (ppm) 115.5, 118.8, 120.2, 129.5, 136.9, 145.4

#### 4-phenylmorpholine (**3h**)<sup>1</sup>

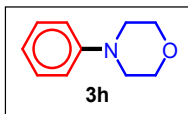

Synthesized as per the general experimental procedure **A**; obtained as a light yellow solid, Yield: (95 mg, 78%); mp 50-51 °C; <sup>1</sup>H NMR (400 MHz, DMSO-*d*<sub>6</sub>): δ<sub>H</sub> (ppm) 3.03-3.05 (m, 4H), 3.68-3.70 (m, 4H), 6.76 (t, *J* = 8 Hz, 1H), 6.89 (d, *J* = 8 Hz, 2H), 7.18 (t, *J* = 8 Hz, 2H); <sup>13</sup>C NMR (100 MHz, DMSO-*d*<sub>6</sub>): δ<sub>C</sub> (ppm) 48.9, 66.6, 115.6, 119.6, 129.5, 151.6

#### *N*-cyclohexylamine (**3i**)<sup>7</sup>

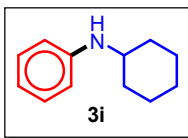

Synthesized as per the general experimental procedure **A**; obtained as a colourless oil, Yield: (117 mg, 89%); <sup>1</sup>H NMR (400 MHz, DMSO-*d*<sub>6</sub>): δ<sub>H</sub> (ppm) 1.07-1.19 (m, 3H), 1.25-1.34 (m, 2H), 1.54-1.58 (m, 1H), 1.66-1.71 (m, 2H), 1.88-1.91 (m, 2H), 3.11-3.16 (m, 1H), 5.22 (s, 1H), 6.44 (t, *J* = 8 Hz, 1H), 6.52 (d, *J* = 8 Hz, 2H), 7.00 (t, *J* = 8 Hz, 2H); <sup>13</sup>C NMR (100 MHz, DMSO-*d*<sub>6</sub>): δ<sub>C</sub> (ppm) 25.1, 26.2, 33.1, 51.1, 112.8, 115.6, 129.3, 148.5

#### 1-Phenylpiperidine (**3j**)<sup>8</sup>

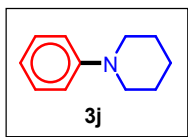

Synthesized as per the general experimental procedure **A**; obtained as a light yellow oil, Yield: (78 mg, 65%); <sup>1</sup>H NMR (400 MHz, DMSO-*d*<sub>6</sub>): δ<sub>H</sub> (ppm) 1.46-1.49 (m, 2H), 1.53-1.59 (m, 4H), 3.05-3.07 (m, 4H), 6.69 (t, *J* = 8 Hz, 1H), 6.86 (d, *J* = 8 Hz, 2H), 7.14 (t, *J* = 8 Hz, 2H); <sup>13</sup>C NMR (100 MHz, DMSO-*d*<sub>6</sub>): δ<sub>C</sub> (ppm) 24.4, 25.7, 50.1, 116.3, 118.8, 129.4, 152.2

#### *N*-(3,4-dichlorophenyl)-2,4-dimethylaniline (**3k**)

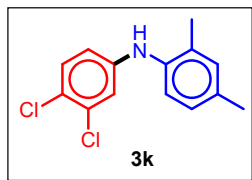

Synthesized as per the general experimental procedure **A**; obtained as a colourless solid, Yield: (126 mg, 63%); mp 187-188 °C; <sup>1</sup>H NMR (400 MHz, DMSO-*d*<sub>6</sub>): δ<sub>H</sub> (ppm) 2.07 (s, 3H), 2.19 (s, 3H), 6.61 (d, *J* = 8 Hz, 1H), 6.77 (d, *J* = 8 Hz, 1H), 6.92 (d, *J* = 8 Hz, 1H), 7.00 (d, *J* = 8 Hz, 2H), 7.24 (d, *J* = 8 Hz, 1H), 7.76 (br s, 1H); <sup>13</sup>C NMR (100 MHz, DMSO-*d*<sub>6</sub>): δ<sub>C</sub> (ppm) 18.1, 20.9, 114.6, 115.2, 123.9, 127.8, 131.2, 131.8, 132.2, 132.50, 133.8, 137.2, 147.2

#### *N*-phenylnaphthalen-2-amine (**3l**)<sup>9</sup>

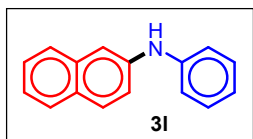

Synthesized as per the general experimental procedure **A**; obtained as a colourless solid, Yield: (131 mg, 80%); mp 109-110 °C; <sup>1</sup>H NMR (400 MHz, DMSO-*d*<sub>6</sub>): δ<sub>H</sub> (ppm) 7.18 (d, *J* = 8 Hz, 2H), 7.20-7.27 (m, 4H), 7.31-7.34 (m, 1H), 7.44 (s, 1H), 7.63 (d, *J* = 8 Hz, 1H), 7.70 (d, *J* = 8 Hz, 1H), 7.73 (d, *J* = 8 Hz, 1H), 8.40 (br s, 1H); <sup>13</sup>C NMR (100 MHz, DMSO-*d*<sub>6</sub>): δ<sub>C</sub> (ppm) 109.5, 117.8, 120.4, 120.7, 123.2, 126.7, 127.9, 128.2, 128.6, 129.3, 129.7, 134.9, 141.9, 143.6

#### *N*-methyl-*N*-(4-trifluoromethyl)phenyl)aniline (**3m**)<sup>10</sup>

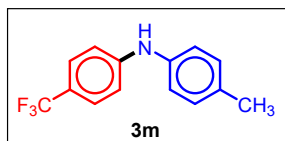

Synthesized as per the general experimental procedure **A**; obtained as a yellow solid, Yield: (139 mg, 74%); mp 78-79 °C; <sup>1</sup>H NMR (400 MHz, DMSO-*d*<sub>6</sub>): δ<sub>H</sub> (ppm) 2.26 (s, 3H), 7.08 (d, *J* = 8 Hz, 4H), 7.13 (d, *J* = 8 Hz, 2H), 7.48 (d, *J* = 8 Hz, 2H), 8.56 (br s, 1H); <sup>13</sup>C NMR (100 MHz, DMSO-*d*<sub>6</sub>): δ<sub>C</sub> (ppm) 20.8, 114.5, 120.3, 124.1, 127.0, 130.2, 131.5, 139.2, 148.6

#### *N*-(*p*-tolyl)pyrimidin-2-amine (**3n**)<sup>11</sup>

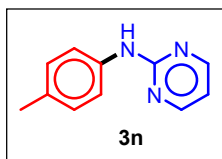

Synthesized as per the general experimental procedure **A**; obtained as a colourless solid, Yield: (70 mg, 50%); mp 122-124 °C; <sup>1</sup>H NMR (400 MHz, DMSO-*d*<sub>6</sub>): δ<sub>H</sub> (ppm) 2.25 (s, 3H), 6.78-6.81 (m, 1H), 7.08 (d, *J* = 8 Hz, 2H), 7.63 (d, *J* = 8 Hz, 2H), 8.45 (d, *J* = 8 Hz, 2H), 9.47 (br s, 1H); <sup>13</sup>C NMR (100 MHz, DMSO-*d*<sub>6</sub>): δ<sub>C</sub> (ppm) 20.8, 112.5, 119.4, 129.3, 130.6, 138.3, 158.4, 160.5

#### *N*-(6-methoxypyridin-3-yl)pyridine-2-amine (**3o**)

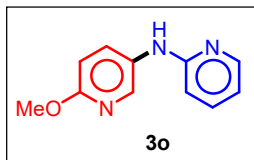

Synthesized as per the general experimental procedure **A**; obtained as a yellow oil, Yield: (82 mg, 55%);  $^1\text{H}$  NMR (400 MHz,  $\text{DMSO-}d_6$ ):  $\delta_H$  (ppm) 3.76 (s, 3H), 6.64-6.67 (m, 1H), 6.71 (t,  $J = 8$  Hz, 2H), 7.49 (t,  $J = 8$  Hz, 1H), 7.97 (d,  $J = 8$  Hz, 1H), 8.04 (d,  $J = 8$  Hz, 1H), 8.35 (s, 1H), 8.87 (br s, 1H);  $^{13}\text{C}$  NMR (100 MHz,  $\text{DMSO-}d_6$ ):  $\delta_C$  (ppm) 53.4, 110.1, 110.5, 110.9, 114.4, 127.7, 131.4, 132.8, 133.0, 137.1, 137.7, 147.6, 149.0, 156.4, 157.3, 158.6

#### *N*-phenylbenzo[*d*][1,3]dioxol-5-amine (**3p**)<sup>9</sup>

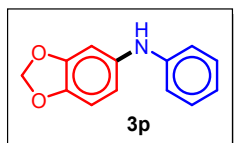

Synthesized as per the general experimental procedure **A**; obtained as a colourless solid, Yield: (117 mg, 73%); mp 150-152 °C;  $^1\text{H}$  NMR (400 MHz,  $\text{DMSO-}d_6$ ):  $\delta_H$  (ppm) 5.90 (s, 2H), 6.51 (dd,  $J = 8$  Hz, 2 Hz, 1H), 6.65 (d,  $J = 8$  Hz, 1H), 6.68-6.71 (m, 1H), 6.76 (d,  $J = 8$  Hz, 1H), 6.90 (d,  $J = 8$  Hz, 2H), 7.13 (t,  $J = 8$  Hz, 2H), 7.85 (br s, 1H);  $^{13}\text{C}$  NMR (100 MHz,  $\text{DMSO-}d_6$ ):  $\delta_C$  (ppm) 101.3, 109.0, 111.3, 115.9, 119.2, 129.6, 138.3, 141.7, 145.1, 148.2

#### $^1\text{H}$ and $^{13}\text{C}$ NMR spectral analysis of 3-arylamino phenols (**5**)

##### 3-(Phenylamino)phenol (**5a**)<sup>12</sup>

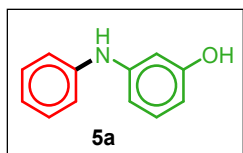

Synthesized as per the general experimental procedure **B**; obtained as a brown solid, Yield: (108 mg, 78%); mp 77-78 °C;  $^1\text{H}$  NMR (400 MHz,  $\text{DMSO-}d_6$ ):  $\delta_H$  (ppm) 6.21 (d,  $J = 8$  Hz, 1H), 6.47 (t,  $J = 8$  Hz, 2H), 6.76 (t,  $J = 8$  Hz, 1H), 6.96 (t,  $J = 8$  Hz, 1H), 7.02 (d,  $J = 8$  Hz, 2H), 7.17 (t,  $J = 8$  Hz, 2H), 7.98 (br s, 1H), 9.14 (br s, 1H);  $^{13}\text{C}$  NMR (100 MHz,  $\text{DMSO-}d_6$ ):  $\delta_C$  (ppm) 104.0, 107.4, 108.2, 117.5, 120.0, 129.6, 130.3, 143.9, 145.1, 158.7

##### 3-((4-Methoxyphenyl)amino)phenol (**5b**)<sup>13</sup>

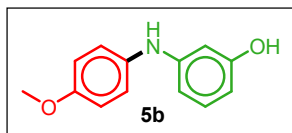

Synthesized as per the general experimental procedure **B**; obtained as a brown solid, Yield: (132 mg, 82%); mp 69-70 °C;  $^1\text{H}$  NMR (400 MHz,  $\text{DMSO-}d_6$ ):  $\delta_H$  (ppm) 3.66 (s, 3H), 6.08 (d,  $J = 8$  Hz, 1H), 6.30 (d,  $J = 8$  Hz, 2H), 6.81 (d,  $J = 8$  Hz, 2H), 6.88 (t,  $J = 8$  Hz, 1H), 6.97 (d,  $J = 8$  Hz, 2H), 7.68 (br s, 1H), 9.04 (br s, 1H);  $^{13}\text{C}$  NMR (100 MHz,  $\text{DMSO-}d_6$ ):  $\delta_C$  (ppm) 55.6, 102.0, 106.2, 114.9, 121.2, 130.2, 136.6, 146.9, 154.2, 158.7

### 3-((4-Ethylphenyl)amino)phenol (**5c**)

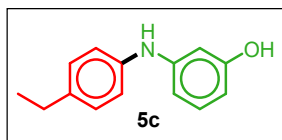

Synthesized as per the general experimental procedure **B**; obtained as a brown solid, Yield: (120 mg, 75%); mp 84-85 °C;  $^1\text{H}$  NMR (400 MHz,  $\text{DMSO-}d_6$ ):  $\delta_H$  (ppm) 1.10 (t,  $J = 8$  Hz, 3H), 2.47 (q,  $J = 8$  Hz, 2H), 6.15 (dd,  $J = 8$  Hz, 1.2 Hz, 1H), 6.41 (t,  $J = 8$  Hz, 2H), 6.90-6.95 (m, 3H), 7.02 (d,  $J = 8$  Hz, 2H), 7.86 (br s, 1H), 9.10 (br s, 1H);  $^{13}\text{C}$  NMR (100 MHz,  $\text{DMSO-}d_6$ ):  $\delta_C$  (ppm) 16.4, 19.4, 103.0, 106.8, 107.5, 118.3, 128.8, 130.2, 135.7, 141.4, 145.7, 158.6

### 3-(*m*-tolylamino)phenol (**5d**)

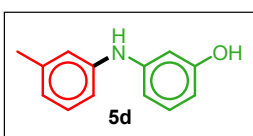

Synthesized as per the general experimental procedure **B**; obtained as a yellow solid, Yield: (108 mg, 73%); mp 79-80 °C;  $^1\text{H}$  NMR (400 MHz,  $\text{DMSO-}d_6$ ):  $\delta_H$  (ppm) 2.20 (s, 3H), 6.22 (d,  $J = 8$  Hz, 1H), 6.48 (t,  $J = 8$  Hz, 2H), 6.59 (d,  $J = 8$  Hz, 1H), 6.84 (d,  $J = 8$  Hz, 2H), 6.96 (t,  $J = 8$  Hz, 1H), 7.06 (t,  $J = 8$  Hz, 1H), 7.92 (br s, 1H), 9.16 (br s, 1H);  $^{13}\text{C}$  NMR (100 MHz,  $\text{DMSO-}d_6$ ):  $\delta_C$  (ppm) 21.7, 103.9, 107.4, 108.3, 114.7, 118.2, 120.9, 129.4, 130.3, 138.7, 143.9, 145.2, 158.7

### 3-(*o*-tolylamino)phenol (**5e**)<sup>12</sup>

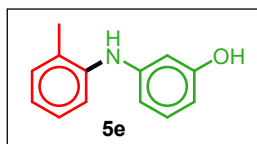

Synthesized as per the general experimental procedure **B**; obtained as a yellow oil, Yield: (94 mg, 63%);  $^1\text{H}$  NMR (400 MHz,  $\text{DMSO-}d_6$ ):  $\delta_H$  (ppm) 2.13 (s, 3H), 6.12 (dd,  $J = 8$  Hz, 2 Hz, 1H), 6.24-6.28 (m, 2H), 6.84 (d,  $J = 8$  Hz, 1H), 6.89 (t,  $J = 8$  Hz, 1H), 7.05 (t,  $J = 8$  Hz, 1H), 7.12 (t,  $J = 8$  Hz, 2H), 7.21 (br s, 1H), 9.03 (br s, 1H);  $^{13}\text{C}$  NMR (100 MHz,  $\text{DMSO-}d_6$ ):  $\delta_C$  (ppm) 18.5, 103.1, 106.5, 107.6, 120.8, 122.4, 126.9, 130.2, 131.31, 141.8, 146.8, 158.6

### 3-((4-Fluorophenyl)amino)phenol (**5f**)<sup>11</sup>

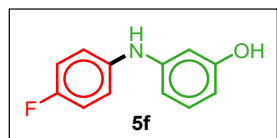

Synthesized as per the general experimental procedure **B**; obtained as a yellow oil, Yield: (119 mg, 78%);  $^1\text{H}$  NMR (400 MHz,  $\text{DMSO-}d_6$ ):  $\delta_H$  (ppm) 6.17 (d,  $J = 8$  Hz, 1H), 6.37-6.41 (m, 2H), 6.93 (t,  $J = 8$  Hz, 1H), 7.02 (d,  $J = 8$  Hz, 4H), 7.93 (br s, 1H), 9.13 (br s, 1H);  $^{13}\text{C}$  NMR (100 MHz,  $\text{DMSO-}d_6$ ):  $\delta_C$  (ppm) 103.3, 107.2, 107.6, 116.1, 119.6, 130.3, 140.3, 145.7, 156.8 (d,  $J_{\text{C-F}} = 240$  Hz), 158.7

### 3-((3,4-Difluorophenyl)amino)phenol (**5g**)<sup>13</sup>



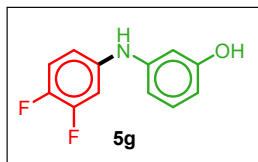

Synthesized as per the general experimental procedure **B**; obtained as a orange solid, Yield: (132 mg, 80%); mp 101-103 °C;  $^1\text{H}$  NMR (400 MHz,  $\text{DMSO-}d_6$ ):  $\delta_H$  (ppm) 6.31 (d,  $J = 8$  Hz, 1H), 6.50 (d,  $J = 8$  Hz, 2H), 6.83 (d,  $J = 8$  Hz, 1H), 6.96-6.99 (m, 1H), 7.02-7.05 (m, 1H), 7.22-7.29 (m, 1H), 8.20 (br s, 1H), 9.27 (br s, 1H);  $^{13}\text{C}$  NMR (100 MHz,  $\text{DMSO-}d_6$ ):  $\delta_C$  (ppm) 104.4, 105.3, 105.5, 108.3, 108.6, 113.1, 118.0, 118.2, 130.4, 141.5, 143.5 (d,  $J_{\text{C-F}} = 240$  Hz), 144.3, 150.1 (d,  $J_{\text{C-F}} = 250$  Hz), 158.7

### 3-((4-Chlorophenyl)amino)phenol (**5h**)<sup>13</sup>

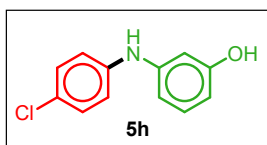

Synthesized as per the general experimental procedure **B**; obtained as a brown solid, Yield: (125 mg, 76%); mp 109-110 °C;  $^1\text{H}$  NMR (400 MHz,  $\text{DMSO-}d_6$ ):  $\delta_H$  (ppm) 6.23 (d,  $J = 8$  Hz, 1H), 6.45 (d,  $J = 8$  Hz, 2H), 6.95-7.01 (m, 3H), 7.19 (d,  $J = 8$  Hz, 2H), 8.15 (br s, 1H), 9.23 (br s, 1H);  $^{13}\text{C}$  NMR (100 MHz,  $\text{DMSO-}d_6$ ):  $\delta_C$  (ppm) 104.4, 108.1, 108.7, 117.4, 118.5, 123.0, 129.3, 130.5, 143.1, 144.4, 158.7

### 2-Methyl-5-(phenylamino)phenol (**5i**)<sup>14</sup>

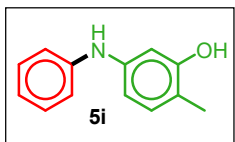

Synthesized as per the general experimental procedure **B**; obtained as a brown solid, Yield: (119 mg, 80%); mp 93-94 °C;  $^1\text{H}$  NMR (400 MHz,  $\text{DMSO-}d_6$ ):  $\delta_H$  (ppm) 1.98 (s, 3H), 6.38 (d,  $J = 8$  Hz, 1H), 6.55 (s, 1H), 6.70 (t,  $J = 8$  Hz, 1H), 6.84 (d,  $J = 8$  Hz, 1H), 6.95 (d,  $J = 8$  Hz, 2H), 7.13 (t,  $J = 8$  Hz, 2H), 7.84 (br s, 1H), 9.05 (br s, 1H);  $^{13}\text{C}$  NMR (100 MHz,  $\text{DMSO-}d_6$ ):  $\delta_C$  (ppm) 15.9, 104.6, 108.8, 115.9, 116.6, 119.3, 129.5, 131.3, 142.4, 144.6, 156.3

### 2-Chloro-5-(phenylamino)phenol (**5j**)<sup>13</sup>

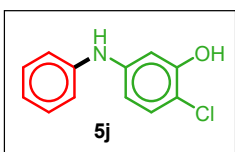

Synthesized as per the general experimental procedure **B**; obtained as a brown solid, Yield: (132 mg, 80%); mp 91-92 °C;  $^1\text{H}$  NMR (400 MHz,  $\text{DMSO-}d_6$ ):  $\delta_H$  (ppm) 6.50 (d,  $J = 8$  Hz, 1H), 6.75 (s, 1H), 6.85 (t,  $J = 8$  Hz, 1H), 7.06 (d,  $J = 8$  Hz, 2H), 7.12 (d,  $J = 8$  Hz, 1H), 7.23-7.26 (m, 2H), 8.17 (br s, 1H), 9.92 (br s, 1H);  $^{13}\text{C}$  NMR (100 MHz,  $\text{DMSO-}d_6$ ):  $\delta_C$  (ppm) 104.5, 109.0, 110.1, 117.9, 120.5, 129.6, 130.4, 143.4, 143.9, 153.9

### 3-((3-Nitrophenyl)amino)phenol (**5I**)<sup>12</sup>

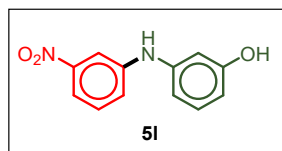

Synthesized as per the general experimental procedure **B**; obtained as a yellow liquid, Yield: (120 mg, 70%); <sup>1</sup>H NMR (400 MHz, DMSO-*d*<sub>6</sub>): δ<sub>H</sub> (ppm) 6.41 (d, *J* = 8 Hz, 1H), 6.59-6.61 (m, 2H), 7.11 (t, *J* = 8 Hz, 1H), 7.42 (d, *J* = 8 Hz, 1H), 7.46 (t, *J* = 8 Hz, 1H), 7.58 (d, *J* = 8 Hz, 1H), 7.81 (s, 1H), 8.62 (br s, 1H), 9.40 (br s, 1H); <sup>13</sup>C NMR (100 MHz, DMSO-*d*<sub>6</sub>): δ<sub>C</sub> (ppm) 105.9, 109.4, 109.5, 109.8, 113.5, 122.1, 130.5, 130.8, 143.2, 145.8, 149.1, 158.8

### <sup>1</sup>H and <sup>13</sup>C NMR spectral analysis of *N*-arylamides (**7**)

#### *N*-phenylbenzamide (**7a**)<sup>15</sup>

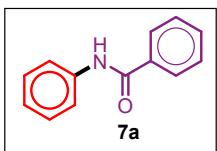

Synthesized as per the general experimental procedure **C**; obtained as a colourless solid, Yield: (94 mg, 64%); mp 162-163 °C; <sup>1</sup>H NMR (400 MHz, DMSO-*d*<sub>6</sub>): δ<sub>H</sub> (ppm) 7.06 (t, *J* = 8 Hz, 1H), 7.31 (t, *J* = 8 Hz, 2H), 7.49 (t, *J* = 8 Hz, 2H), 7.55 (t, *J* = 8 Hz, 1H), 7.74 (d, *J* = 8 Hz, 2H), 7.92 (t, *J* = 8 Hz, 2H), 10.20 (br s, 1H); <sup>13</sup>C NMR (100 MHz, DMSO-*d*<sub>6</sub>): δ<sub>C</sub> (ppm) 120.9, 124.2, 128.1, 128.8, 129.1, 132.0, 135.5, 139.7, 166.1

#### 2-Ethoxy-*N*-phenylbenzamide (**7b**)<sup>16</sup>

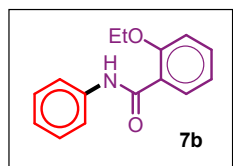

Synthesized as per the general experimental procedure **C**; obtained as a colourless solid, Yield: (115 mg, 64%); mp 71-72 °C; <sup>1</sup>H NMR (400 MHz, DMSO-*d*<sub>6</sub>): δ<sub>H</sub> (ppm) 1.36 (t, *J* = 8 Hz, 3H), 4.13 (q, *J* = 8 Hz, 2H), 7.03 (q, *J* = 8 Hz, 2H), 7.12 (d, *J* = 8 Hz, 1H), 7.30 (t, *J* = 8 Hz, 2H), 7.45 (t, *J* = 8 Hz, 1H), 7.66-7.70 (m, 3H), 10.10 (br s, 1H); <sup>13</sup>C NMR (100 MHz, DMSO-*d*<sub>6</sub>): δ<sub>C</sub> (ppm) 15.0, 64.8, 113.4, 119.9, 121.0, 123.9, 124.8, 129.3, 130.5, 132.8, 139.5, 156.4, 164.6

#### 2-Chloro-*N*-phenylbenzamide (**7c**)<sup>17</sup>

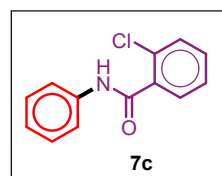

Synthesized as per the general experimental procedure **C**; obtained as a white solid, Yield: (111 mg, 64%); mp 113-115 °C; <sup>1</sup>H NMR (400 MHz, DMSO-*d*<sub>6</sub>): δ<sub>H</sub> (ppm) 7.05-7.08 (m, 1H), 7.31 (t, *J* = 8 Hz, 2H), 7.41 (t, *J* = 8 Hz, 1H), 7.45-7.48 (m, 1H), 7.53 (t, *J* = 8 Hz, 2H), 7.68 (d, *J* = 8 Hz, 2H), 10.47 (br s, 1H); <sup>13</sup>C NMR (100 MHz,

DMSO-*d*<sub>6</sub>):  $\delta_c$  (ppm) 120.0, 124.3, 127.8, 129.3, 130.2, 130.4, 131.5, 137.5, 139.4, 165.4

#### 4-Methyl-*N*-phenylbenzamide (**7d**)<sup>1</sup>

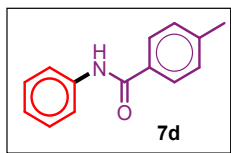

Synthesized as per the general experimental procedure **C**; obtained as a white solid, Yield: (101 mg, 64%); mp 156-157 °C; <sup>1</sup>H NMR (400 MHz, DMSO-*d*<sub>6</sub>):  $\delta_H$  (ppm) 2.42 (s, 3H), 7.13 (t, *J* = 8 Hz, 1H), 7.36-7.40 (m, 4H), 7.82 (d, *J* = 8 Hz, 2H), 7.92 (d, *J* = 8 Hz, 2H), 10.20 (br s, 1H); <sup>13</sup>C NMR (100 MHz, DMSO-*d*<sub>6</sub>):  $\delta_c$  (ppm) 21.4, 120.8, 124.0, 128.1, 129.0, 129.37, 132.5, 139.7, 142.0, 165.8

#### *N*-phenylnicotinamide (**7e**)<sup>18</sup>

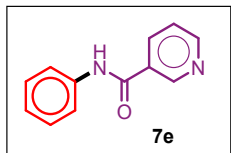

Synthesized as per the general experimental procedure **C**; obtained as a brown solid, Yield: (119 mg, 80%); mp 117-118 °C; <sup>1</sup>H NMR (400 MHz, DMSO-*d*<sub>6</sub>):  $\delta_H$  (ppm) 7.16 (t, *J* = 8 Hz, 1H), 7.40 (t, *J* = 8 Hz, 2H), 7.60 (t, *J* = 8 Hz, 1H), 7.82 (d, *J* = 8 Hz, 2H), 8.33 (d, *J* = 8 Hz, 1H), 8.80 (s, 1H), 9.15 (s, 1H), 10.48 (br s, 1H); <sup>13</sup>C NMR (100 MHz, DMSO-*d*<sub>6</sub>):  $\delta_c$  (ppm) 120.8, 123.9, 124.4, 129.1, 131.1, 135.9, 139.3, 149.1, 152.5, 164.5

#### *N*-phenylisonicotinamide (**7f**)<sup>19</sup>

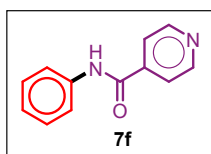

Synthesized as per the general experimental procedure **C**; obtained as a light brown solid, Yield: (110 mg, 74%); mp 169-170 °C; <sup>1</sup>H NMR (400 MHz, DMSO-*d*<sub>6</sub>):  $\delta_H$  (ppm) 7.15 (t, *J* = 8 Hz, 1H), 7.39 (t, *J* = 8 Hz, 2H), 7.79 (d, *J* = 8 Hz, 2H), 7.88 (d, *J* = 8 Hz, 2H), 8.80 (d, *J* = 8 Hz, 2H), 10.51 (br s, 1H); <sup>13</sup>C NMR (100 MHz, DMSO-*d*<sub>6</sub>):  $\delta_c$  (ppm) 120.9, 122.0, 124.6, 129.1, 139.0, 142.4, 150.7, 164.4

#### 4-Nitro-*N*-phenylbenzamide (**7g**)<sup>15</sup>

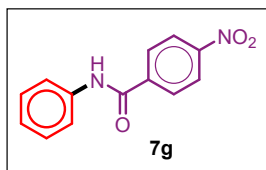

Synthesized as per the general experimental procedure **C**; obtained as a Off-white solid, Yield: (116 mg, 64%); mp 199-200 °C; <sup>1</sup>H NMR (400 MHz, DMSO-*d*<sub>6</sub>):  $\delta_H$  (ppm) 7.15 (t, *J* = 8 Hz, 1H), 7.39 (t, *J* = 8 Hz, 2H), 7.79 (d, *J* = 8 Hz, 2H), 8.19 (d, *J* = 8 Hz, 2H), 8.38 (d, *J* = 8 Hz, 2H), 10.57 (br s, 1H); <sup>13</sup>C NMR (100 MHz, DMSO-*d*<sub>6</sub>):  $\delta_c$  (ppm) 120.9, 124.0, 124.6, 129.1, 129.6, 139.1, 141.1, 149.6, 164.3

### 2-Amino-*N*-phenylbenzamide (**7h**)<sup>20</sup>

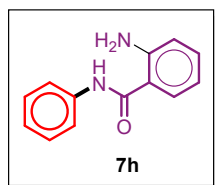

Synthesized as per the general experimental procedure **C**; obtained as a colourless solid, Yield: (116 mg, 73%); mp 131-132 °C; <sup>1</sup>H NMR (400 MHz, DMSO-*d*<sub>6</sub>): δ<sub>H</sub> (ppm) 6.31 (s, 2H), 6.60 (t, *J* = 8 Hz, 1H), 6.76 (d, *J* = 8 Hz, 1H), 7.08 (t, *J* = 8 Hz, 1H), 7.19-7.22 (m, 1H), 7.33 (t, *J* = 8 Hz, 2H), 7.63 (d, *J* = 8 Hz, 1H), 7.72 (d, *J* = 8 Hz, 2H), 9.98 (br s, 1H); <sup>13</sup>C NMR (100 MHz, DMSO-*d*<sub>6</sub>): δ<sub>C</sub> (ppm) 115.1, 115.7, 116.8, 121.0, 123.8, 128.9, 129.1, 132.5, 139.7, 150.1, 168.3

### *N*-(3,4-dimethoxyphenyl)-3,5-dimethoxybenzamide (**7i**)<sup>21</sup>

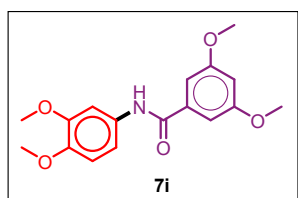

Synthesized as per the general experimental procedure **C**; obtained as a light purple solid, Yield: (142 mg, 60%); mp 188-189 °C; <sup>1</sup>H NMR (400 MHz, DMSO-*d*<sub>6</sub>): δ<sub>H</sub> (ppm) 3.75 (s, 3H), 3.76 (s, 3H), 3.83 (s, 6H), 6.71 (s, 1H), 6.94 (d, *J* = 8 Hz, 1H), 7.11 (s, 2H), 7.32 (dd, *J* = 8 Hz, 2.4 Hz, 1H), 7.47 (s, 1H), 10.02 (br s, 1H); <sup>13</sup>C NMR (100 MHz, DMSO-*d*<sub>6</sub>): δ<sub>C</sub> (ppm) 55.8, 55.9, 56.2, 103.6, 106.0, 106.1, 112.3, 112.9, 133.0, 137.5, 145.7, 148.9, 160.8, 165.0

### *N*-(4-fluorophenyl)benzamide (**7j**)<sup>22</sup>

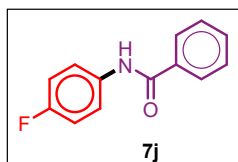

Synthesized as per the general experimental procedure **C**; obtained as a colourless solid, Yield: (129 mg, 80%); mp 183-184 °C; <sup>1</sup>H NMR (400 MHz, DMSO-*d*<sub>6</sub>): δ<sub>H</sub> (ppm) 7.20 (t, *J* = 8 Hz, 2H), 7.54 (t, *J* = 8 Hz, 2H), 7.60 (t, *J* = 8 Hz, 1H), 7.80-7.83 (m, 2H), 7.97 (d, *J* = 8 Hz, 2H), 10.31 (br s, 1H); <sup>13</sup>C NMR (100 MHz, DMSO-*d*<sub>6</sub>): δ<sub>C</sub> (ppm) 115.5, 115.7, 122.6, 122.7, 128.0, 128.8, 132.0, 135.3, 136.0, 158.7 (d, *J*<sub>C-F</sub> = 240 Hz), 165.9

### *N*-(3-cyanophenyl)benzamide (**7k**)<sup>23</sup>

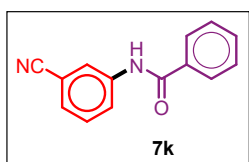

Synthesized as per the general experimental procedure **C**; obtained as a colourless solid, Yield: (113 mg, 68%); mp 135-136 °C; <sup>1</sup>H NMR (400 MHz, DMSO-*d*<sub>6</sub>): δ<sub>H</sub> (ppm) 7.55 (d, *J* = 8 Hz, 2H), 7.59 (d, *J* = 8 Hz, 2H), 7.63 (t, *J* = 8 Hz, 1H), 7.98 (d, *J* = 4 Hz, 2H), 8.06 (d, *J* = 8 Hz, 1H), 8.27 (s, 1H), 10.56 (br s, 1H); <sup>13</sup>C NMR (100 MHz, DMSO-*d*<sub>6</sub>): δ<sub>C</sub> (ppm) 111.9, 119.2, 123.4, 125.3, 127.6, 128.2, 128.9, 129.3, 130.6, 132.4, 134.8, 140.4, 166.4

*N*-(3,4-dimethoxyphenyl)benzamide (**7l**)<sup>22</sup>

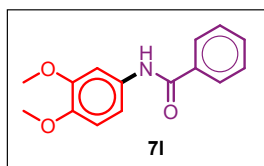

Synthesized as per the general experimental procedure **C**; obtained as a colourless solid, Yield: (158 mg, 82%); mp 179-180 °C; <sup>1</sup>H NMR (400 MHz, DMSO-*d*<sub>6</sub>): δ<sub>H</sub> (ppm) 3.75 (s, 3H), 3.77 (s, 3H), 6.94 (d, *J* = 8 Hz, 1H), 7.36 (d, *J* = 8 Hz, 1H), 7.53 (t, *J* = 8 Hz, 3H), 7.58 (d, *J* = 8 Hz, 1H), 7.97 (d, *J* = 8 Hz, 2H), 10.11 (br s, 1H); <sup>13</sup>C NMR (100 MHz, DMSO-*d*<sub>6</sub>): δ<sub>C</sub> (ppm) 55.8, 56.2, 106.0, 112.4, 112.8, 127.9, 128.8, 131.8, 133.2, 135.5, 145.6, 148.9, 165.5

4-Amino-*N*-phenylbenzenesulfonamide (**7m**)<sup>24</sup>

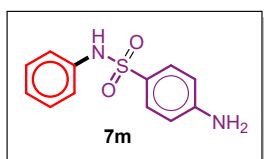

Synthesized as per the general experimental procedure **C**; obtained as a dark-red solid, Yield: (149 mg, 80%); mp 197-198 °C; <sup>1</sup>H NMR (400 MHz, DMSO-*d*<sub>6</sub>): δ<sub>H</sub> (ppm) 5.94 (br s, 2H), 6.54 (d, *J* = 8 Hz, 2H), 6.97 (t, *J* = 8 Hz, 1H), 7.07 (d, *J* = 8 Hz, 2H), 7.20 (t, *J* = 8 Hz, 2H), 7.40 (d, *J* = 8 Hz, 2H), 9.83 (br s, 1H); <sup>13</sup>C NMR (100 MHz, DMSO-*d*<sub>6</sub>): δ<sub>C</sub> (ppm) 113.0, 119.9, 123.7, 124.9, 129.1, 129.4, 129.8, 138.9, 153.2

<sup>1</sup>H and <sup>13</sup>C NMR spectral analysis of **9a** and **9b**

*N*-(5-(*N*-phenylsulfamoyl)-1,3,4-thiadiazol-2-yl)acetamide (**9a**)

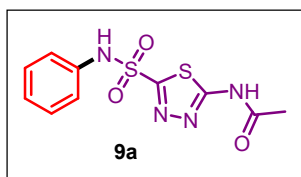

Synthesized as per the general experimental procedure **C**; obtained as a colourless solid, Yield: (157 mg, 70%); mp 288-289 °C; <sup>1</sup>H NMR (400 MHz, DMSO-*d*<sub>6</sub>): δ<sub>H</sub> (ppm) 2.21 (s, 3H), 7.15 (d, *J* = 8 Hz, 1H), 7.20 (d, *J* = 8 Hz, 2H), 7.31 (d, *J* = 8 Hz, 2H), 11.17 (s, 1H), 13.07 (br s, 1H); <sup>13</sup>C NMR (100 MHz, DMSO-*d*<sub>6</sub>): δ<sub>C</sub> (ppm) 22.7, 121.5, 125.6, 129.8, 136.7, 161.0, 162.1, 170.0; HRMS-ESI *m/z*: [M+H]<sup>+</sup> calcd for C<sub>10</sub>H<sub>10</sub>N<sub>4</sub>O<sub>3</sub>S<sub>2</sub>, 298.0194; found, 299.0275

### 5-Chloro-2-methoxy-*N*-(4-(*N*-phenylsulfamoyl)phenethyl)benzamide (**9b**)

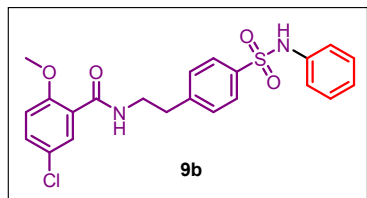

Synthesized as per the general experimental procedure **C**; obtained as a light orange oil, Yield: (166 mg, 50%);  $^1\text{H NMR}$  (400 MHz,  $\text{CDCl}_3$ ):  $\delta_{\text{H}}$  (ppm); 2.93-2.96 (m, 2H), 3.66 (s, 3H), 3.69-3.74 (m, 2H), 6.83 (t,  $J = 8$  Hz, 1H), 7.09 (t,  $J = 8$  Hz, 3H), 7.20-7.24 (m, 3H), 7.30 (d,  $J = 8$  Hz, 2H), 7.36 (dd,  $J = 8$  Hz, 2.8 Hz, 1H), 7.73 (d,  $J = 8$  Hz, 2H), 7.78 (br s, 1H), 8.14 (s, 1H);  $^{13}\text{C NMR}$  (100 MHz,  $\text{CDCl}_3$ ):  $\delta_{\text{C}}$  (ppm) 35.4, 40.5, 56.1, 112.9, 121.5, 122.6, 125.3, 126.7, 127.5, 129.3, 129.5, 131.9, 132.4, 136.5, 137.5, 144.9, 155.9, 164.1; HRMS-ESI  $m/z$ :  $[\text{M}+\text{H}]^+$  calcd for  $\text{C}_{22}\text{H}_{21}\text{ClN}_2\text{O}_4\text{S}$ , 444.0911; found, 445.1014

### 3. References

1. D. S. Raghuvanshi, A. K., Gupta and K. N. Singh, *Org. Lett.*, 2012, **14**, 4326-4329.
2. M. A. Carroll and R. A. Wood, *Tetrahedron*, 2007, **63**, 11349-11354.
3. J. McNulty, S. Cheekoori, T. P. Bender and J. A. Coggan, *Eur. J. Org. Chem.*, 2007, **2007**, 1423-1428.
4. S. Nadri, E. Rafiee, S. Jamali and M. Joshaghani, *Tetrahedron Lett.*, 2014, **55**, 4098-4101.
5. Y. Yu, J. Srogl, and L. S. Liebeskind, *Org. Lett.*, 2004, **6**, 2631-2634.
6. P. G. Alsabeh and M. Stradiotto, *Angew. Chem. Int. Ed.*, 2013, **52**, 7242-7246.
7. S. Roy, M. J. Sarma, B. Kashyap and P. Phukan, *Chem. Commun.*, 2016, **52**, 1170-1173.
8. F. Y. Kwong, A. Klapars and S. L. Buchwald, *Org. Lett.*, 2002, **4**, 581-584.
9. S. Suárez-Pantiga, R. Hernández-Ruiz, C. Virumbrales, M. R. Pedrosa and R. Sanz, *Angew. Chem. Int. Ed.*, 2019, **58**, 2129-2133.
10. V. Semeniuchenko, J. S. Ovens, W. M. Braje and M. G. Organ, *Organometallics*, 2021, **40**, 3276-3290.
11. X. Huang, S. Xu, Q. Tan, M. Gao, M. Li and B. Xu, *Chem. Commun.*, 2014, **50**, 1465-1468.
12. A. S. Reddy, K. R. Reddy, D. N. Rao, C. K. Jaladanki, P. V. Bharatam, P. Y. Lam and P. Das, *Org. Biomol. Chem.*, 2017, **15**, 801-806.
13. D. Maiti and S. L. Buchwald, *J. Am. Chem. Soc.*, 2009, **131**, 17423-17429.
14. S. Paul, B. P. Joy, G. Sasikala, A. G. Raghuthaman and V. B. Gudimetla, *ChemistrySelect* 2020, **5**, 15004-15009.

15. S. Jammi, S. Sakthivel, L. Rout, T. Mukherjee, S. Mandal, R. Mitra, and T. Punniyamurthy, *J. Org. Chem.*, 2009, **74**, 1971-1976.
16. L. M. Werbel, C. A. Hess and E. F. Elslager, *J. Med. Chem.*, 1967, **10**, 508-509.
17. X. Tang, S. Chen and L. Wang, *Asian J. Chem.*, 2012, **24**, 2860-2862.
18. A. Schoenberg, R. F. Heck, *J. Org. Chem.*, 1974, **39**, 3327-3331.
19. B. Stanovnik, M. Tišler, V. Golob, I. Hvala and O. Nikolić, *J. Heterocycl. Chem.*, 1980, **17**, 733-736.
20. R. Cheng, T. Guo, D. Zhang-Negrerie, Y. Du, and K. Zhao, *Synthesis*, 2013, **45**, 2998-3006.
21. S. Fujimoto, K. Matsumoto, T. Iwata and M. Shindo, *Tetrahedron Lett.*, 2017, **58**, 973-976.
22. W. Y. Fang, Y. M. Huang, J. Leng and H. L. Qin, *Asian J. Org. Chem.*, 2018, **7**, 751-756.
23. Z. Chen, P. Liang, B. Liu, H. Luo, J. Zheng, X. Wen, T. Liu and M. Ye, *Org. Biomol. Chem.*, 2018, **16**, 8481-8485.
24. W. Zu, S. Liu, X. Jia and L. Xu, *Org. Chem. Front.*, 2019, **6**, 1356-1360.

#### 4. $^1\text{H}$ and $^{13}\text{C}$ NMR spectra of *N*-aryl derivatives:

##### 4.1 $^1\text{H}$ and $^{13}\text{C}$ NMR spectra of *N*-arylamines (**3**)

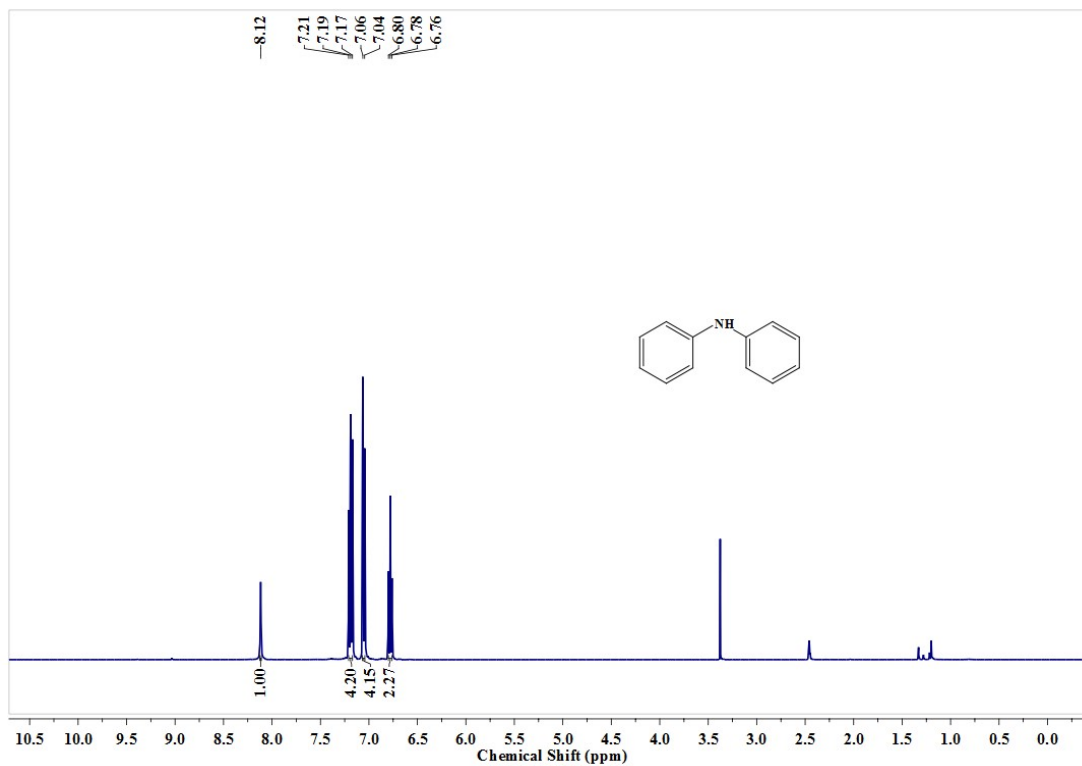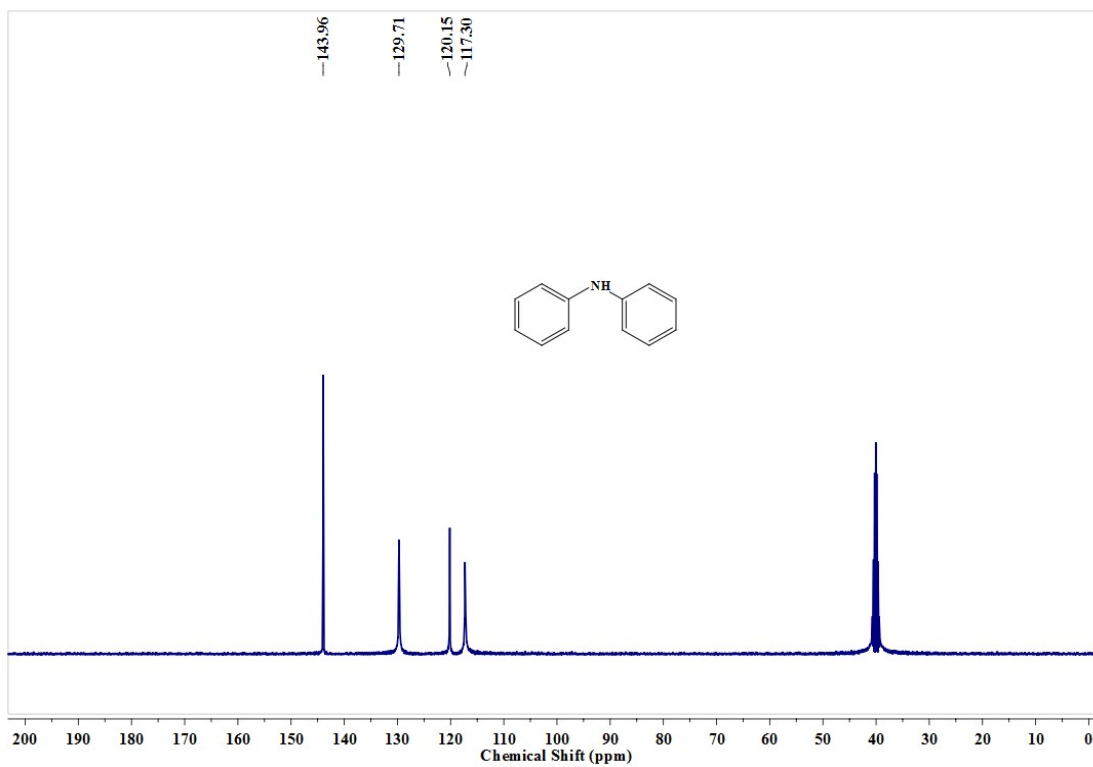



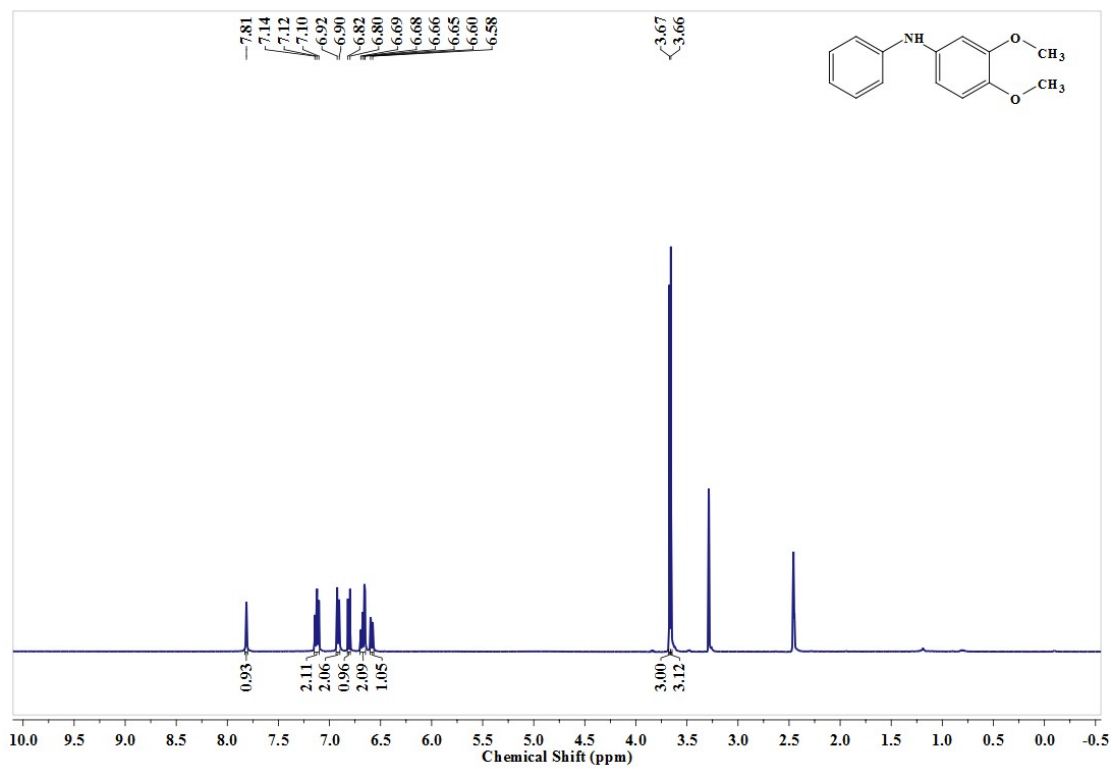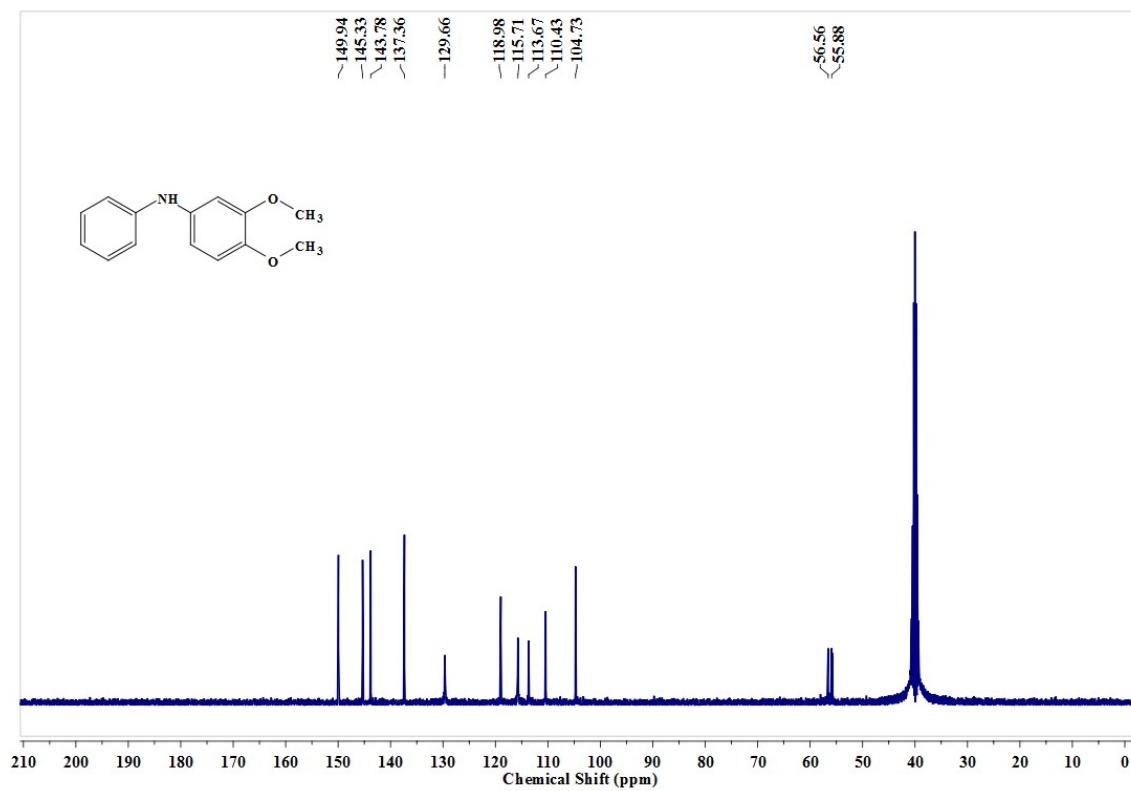

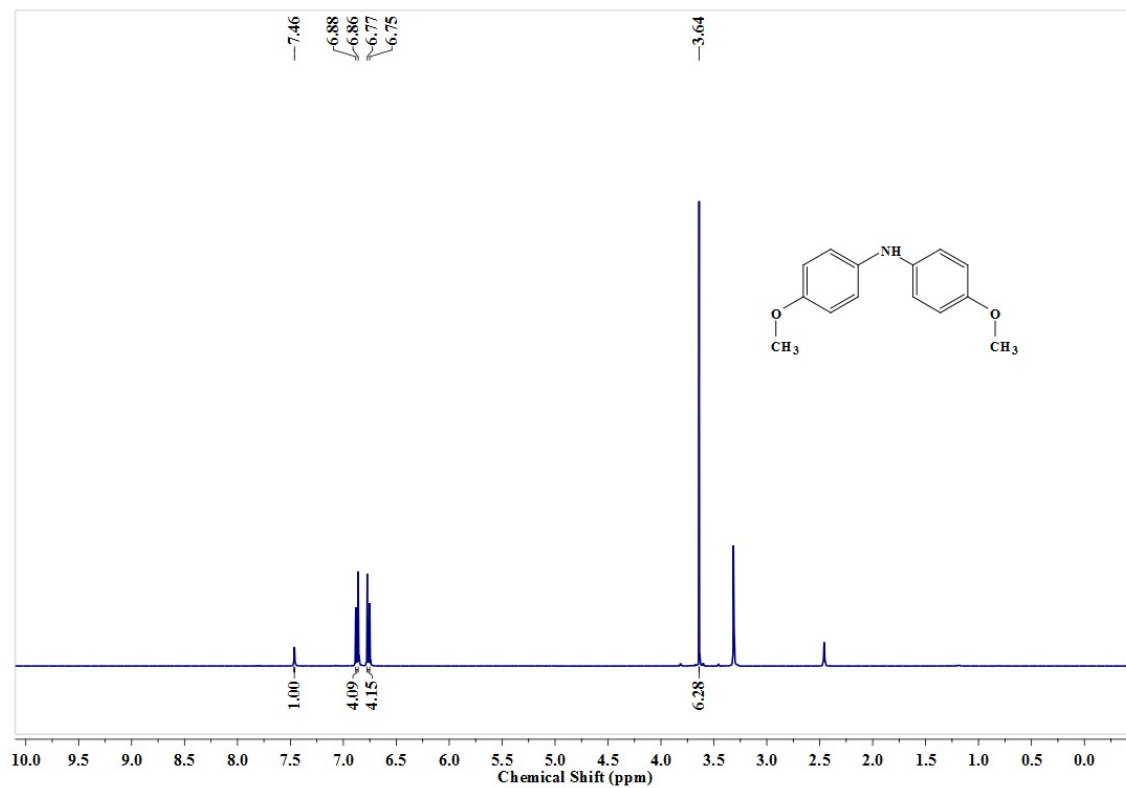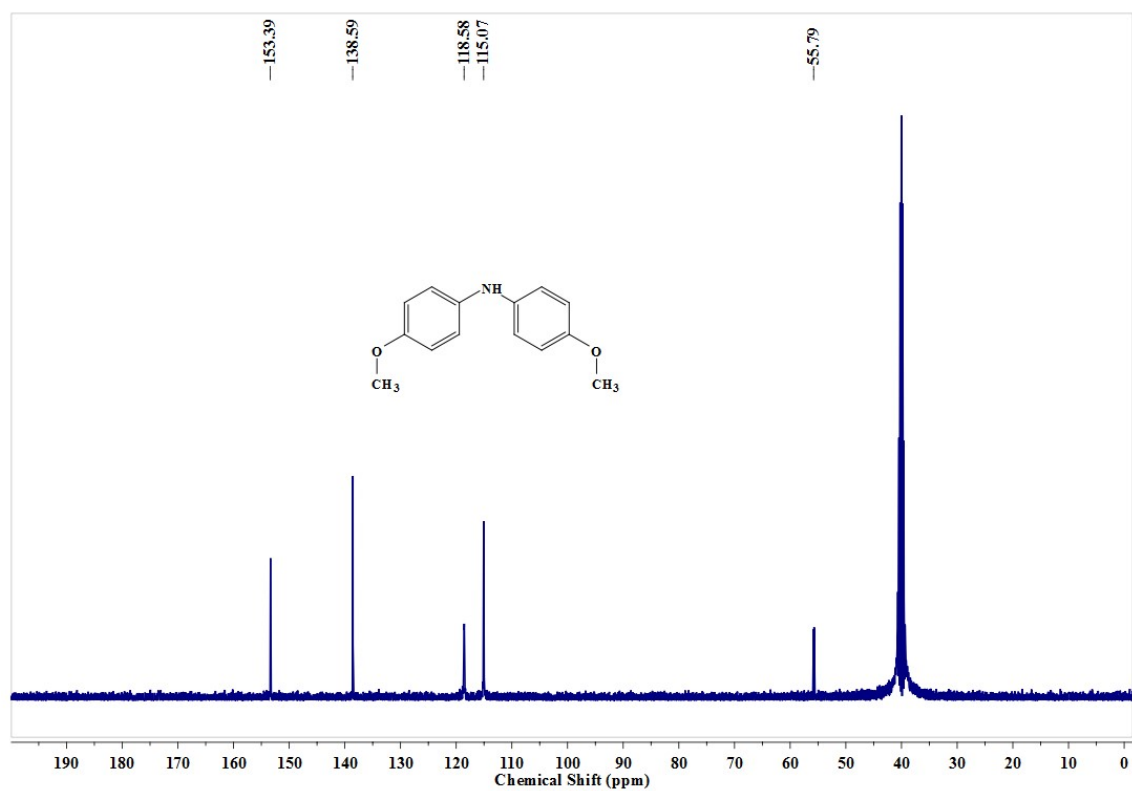

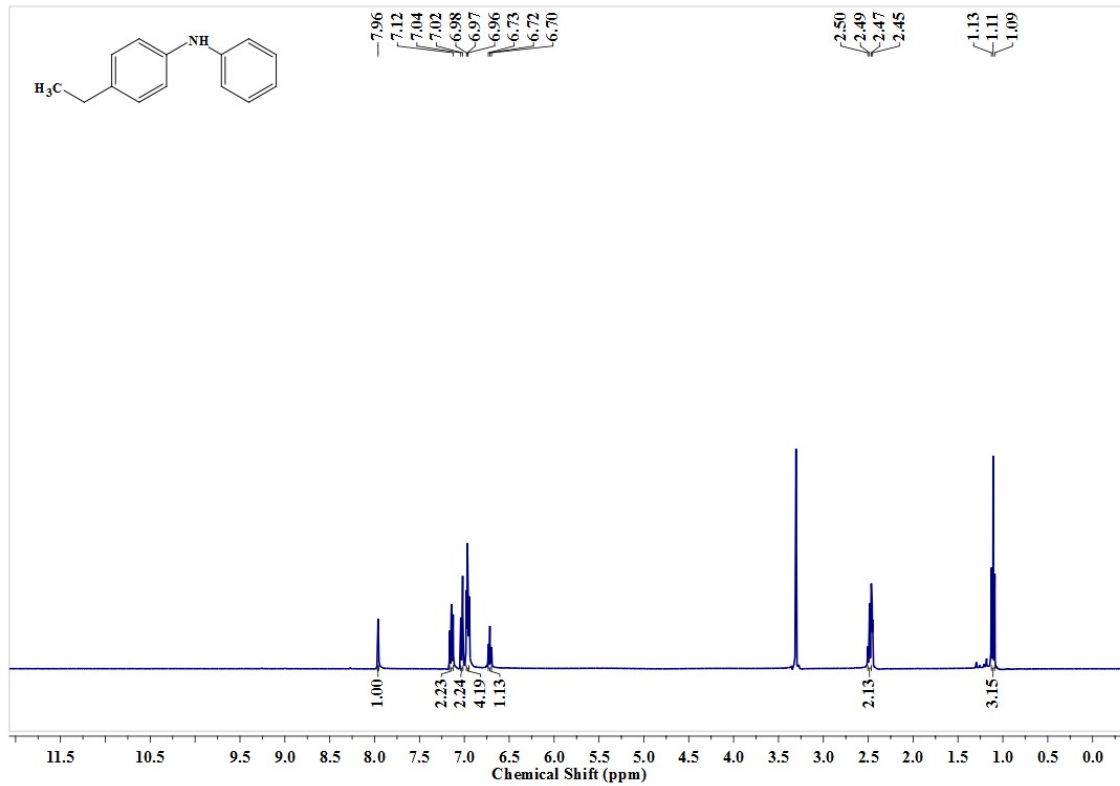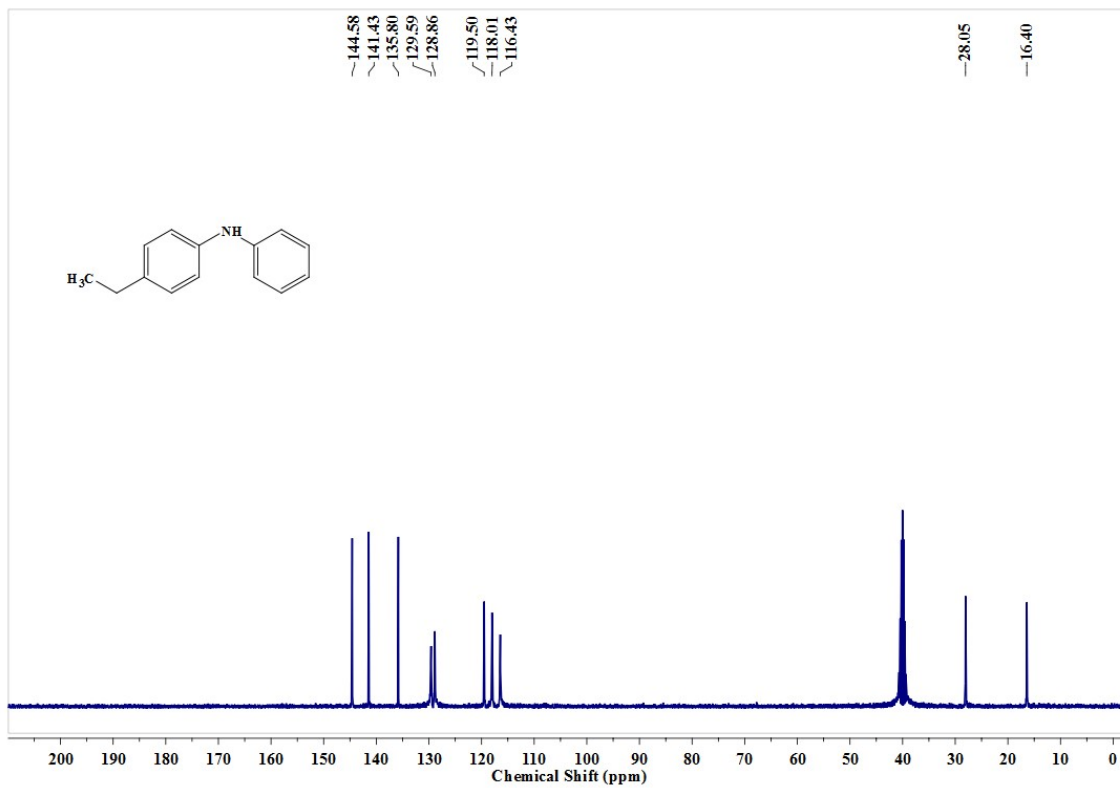

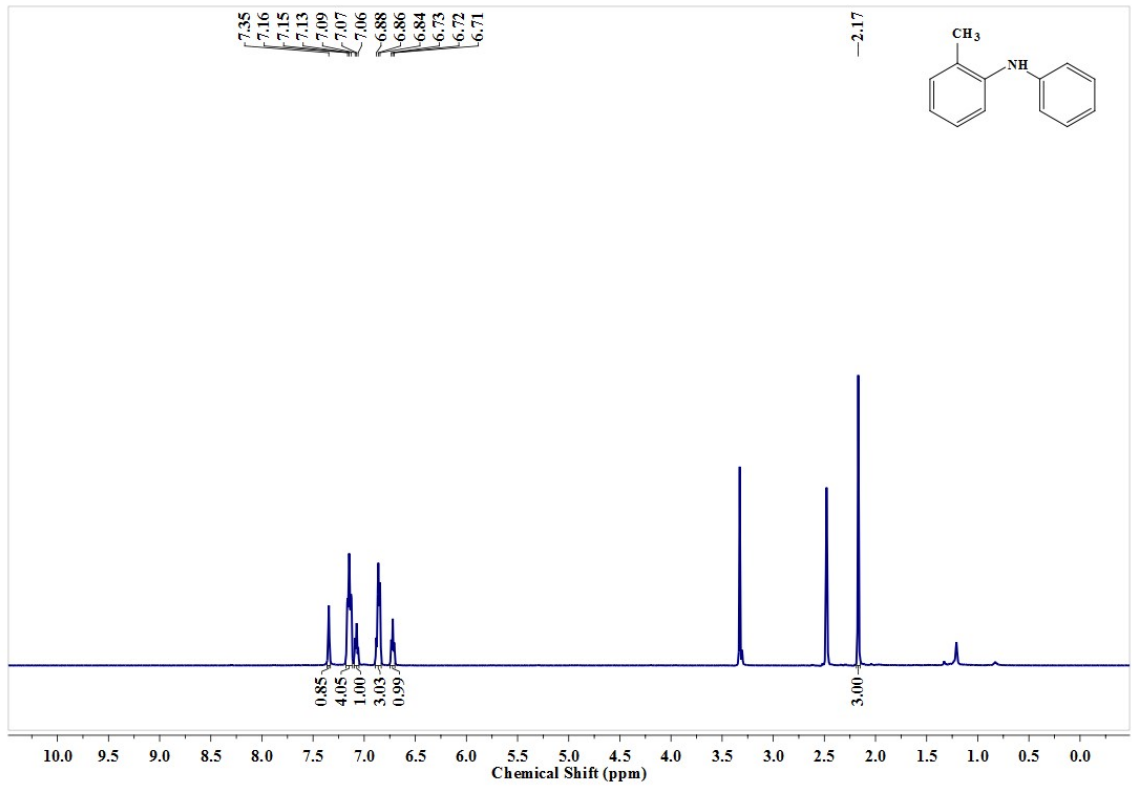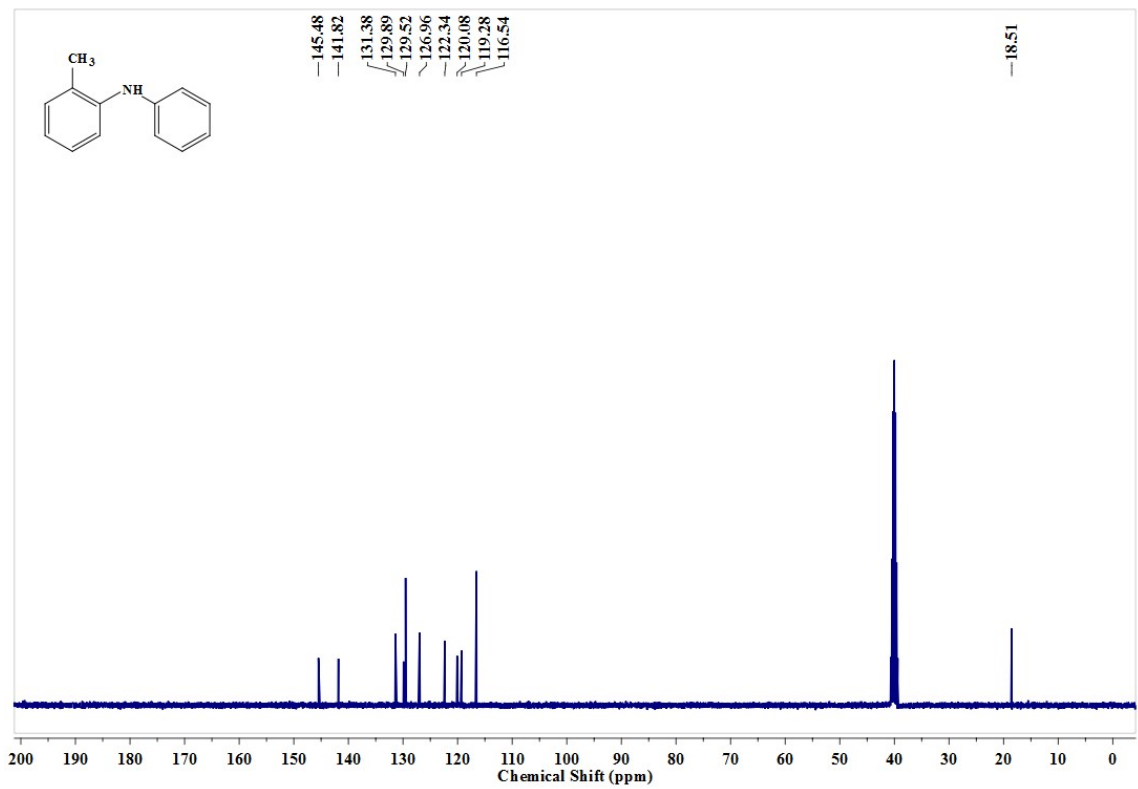

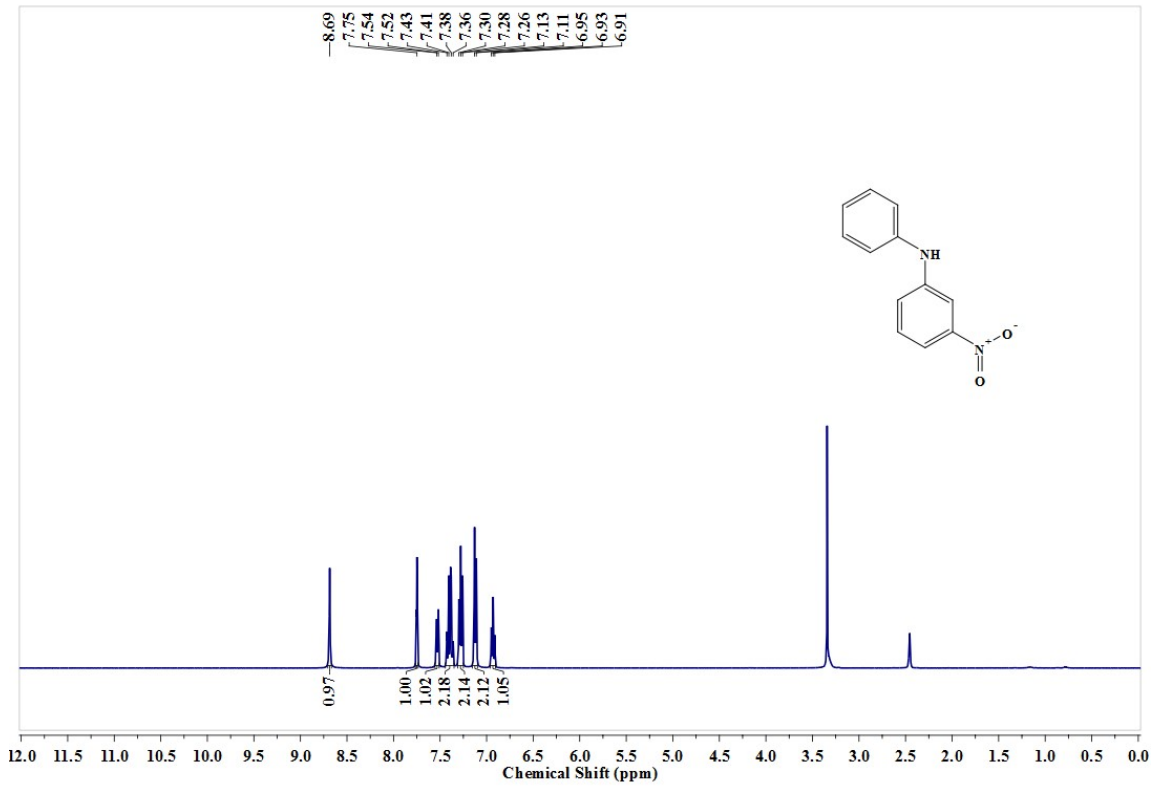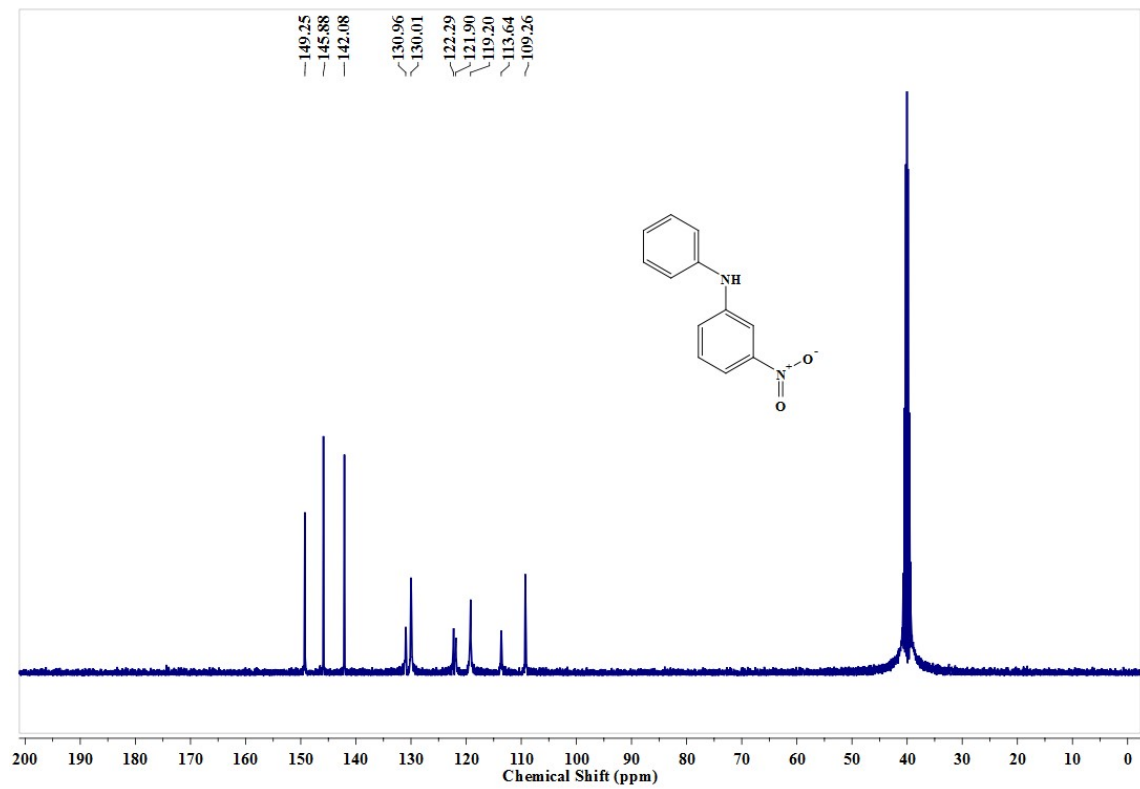

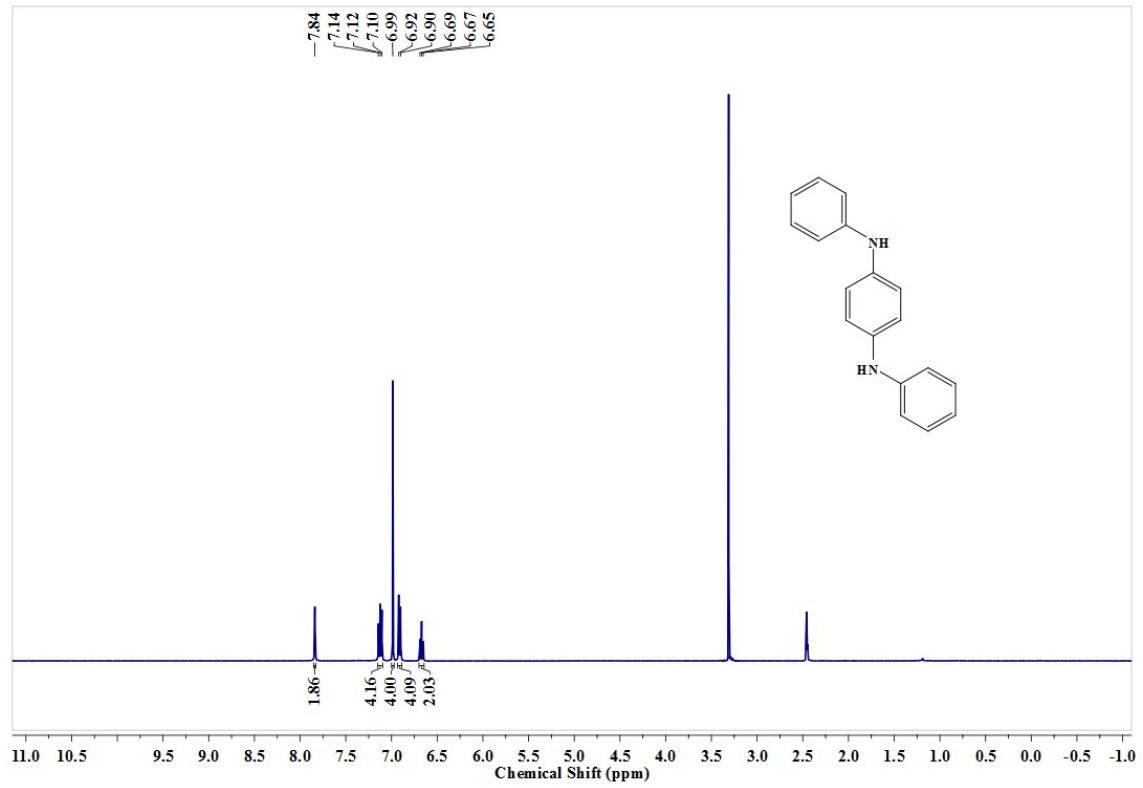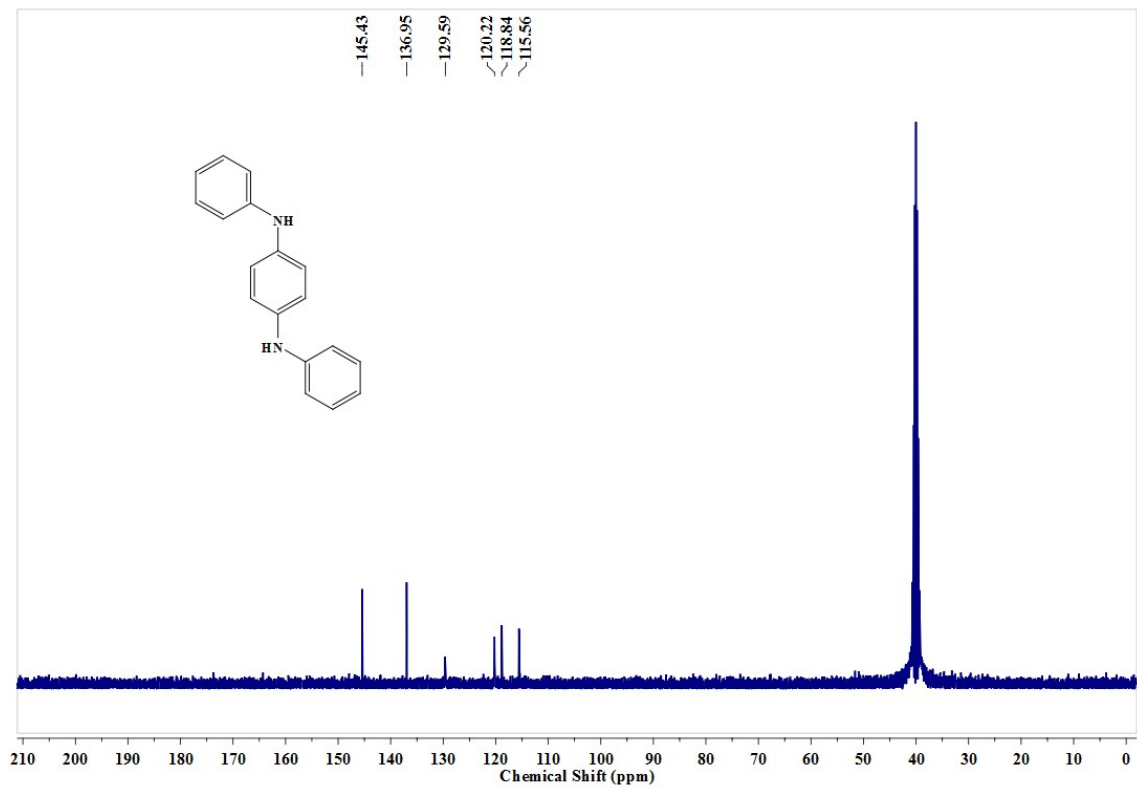

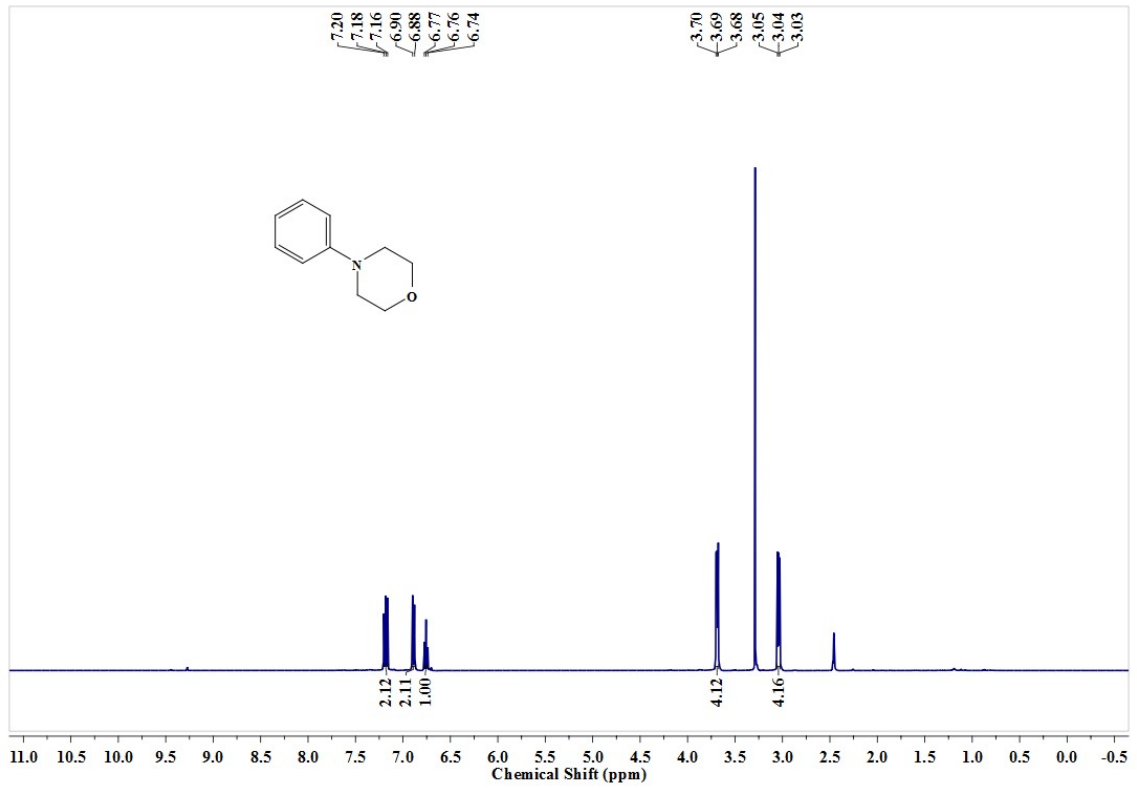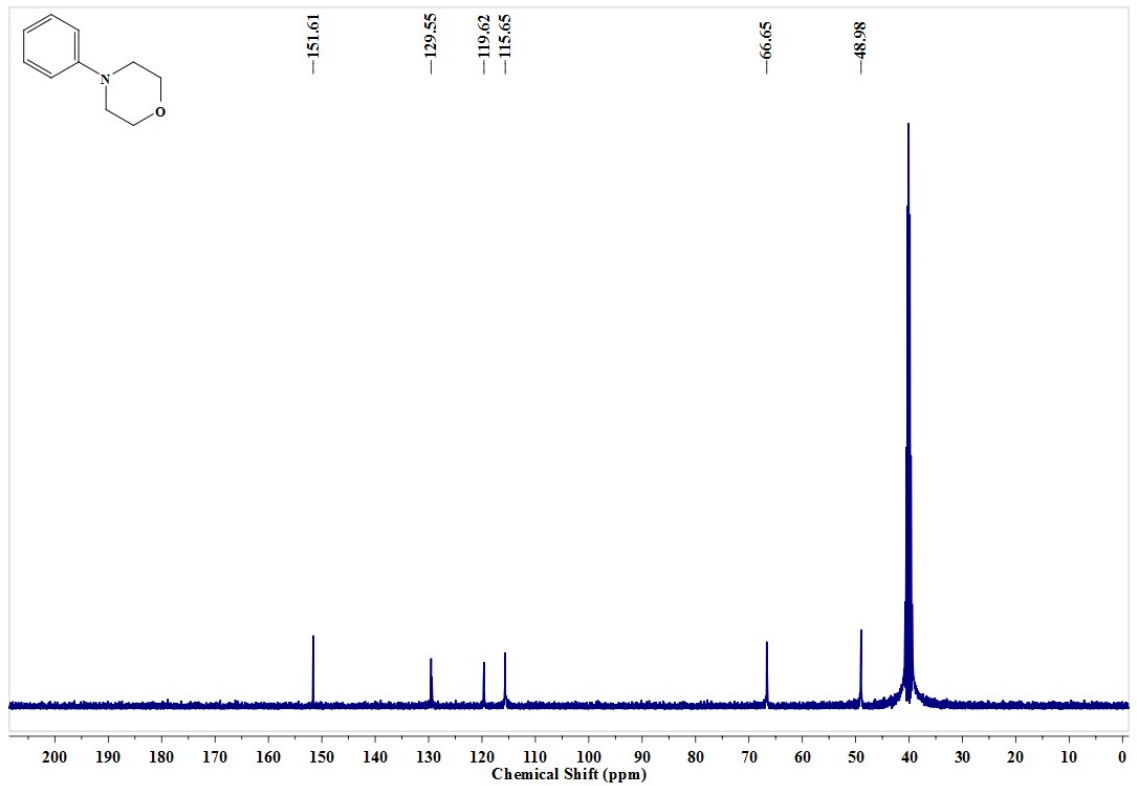

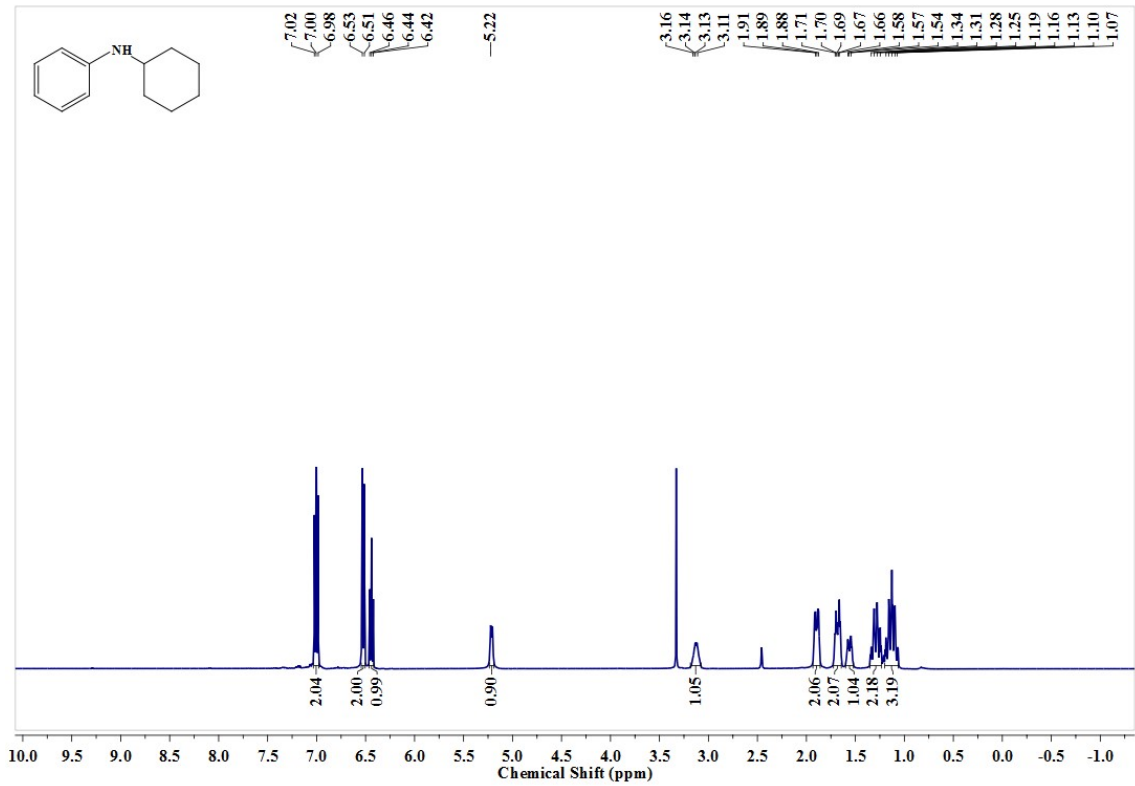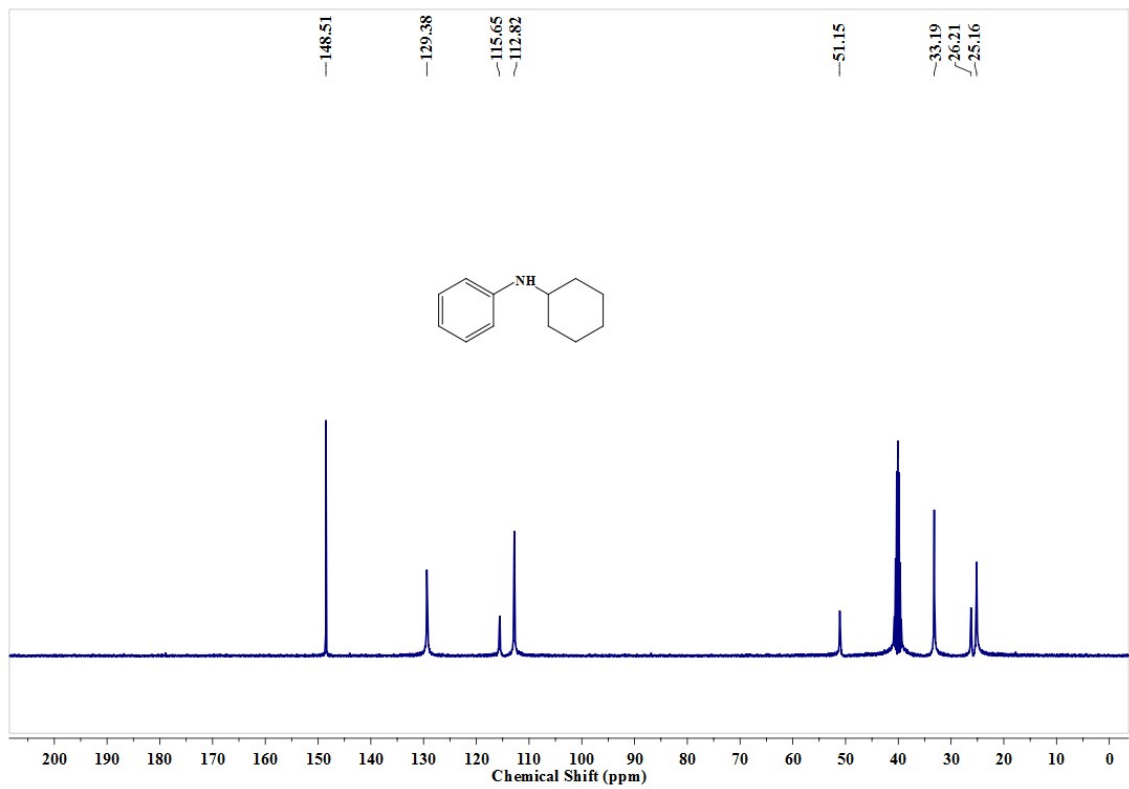



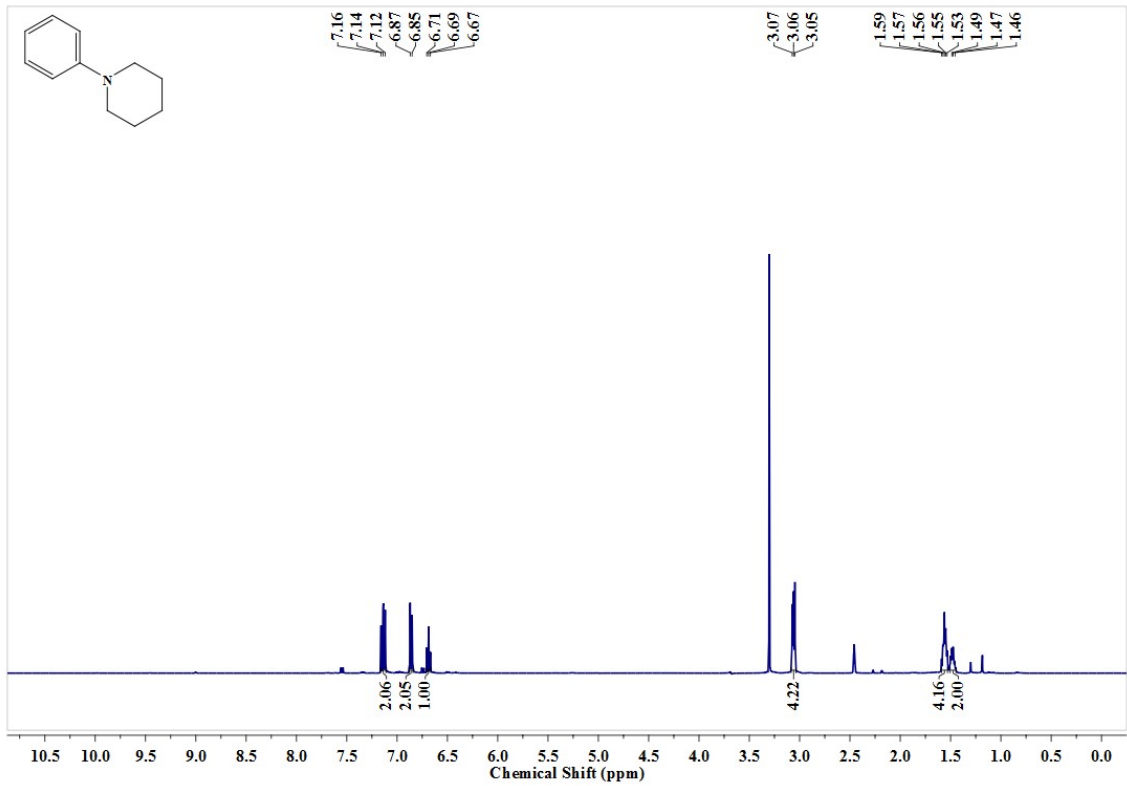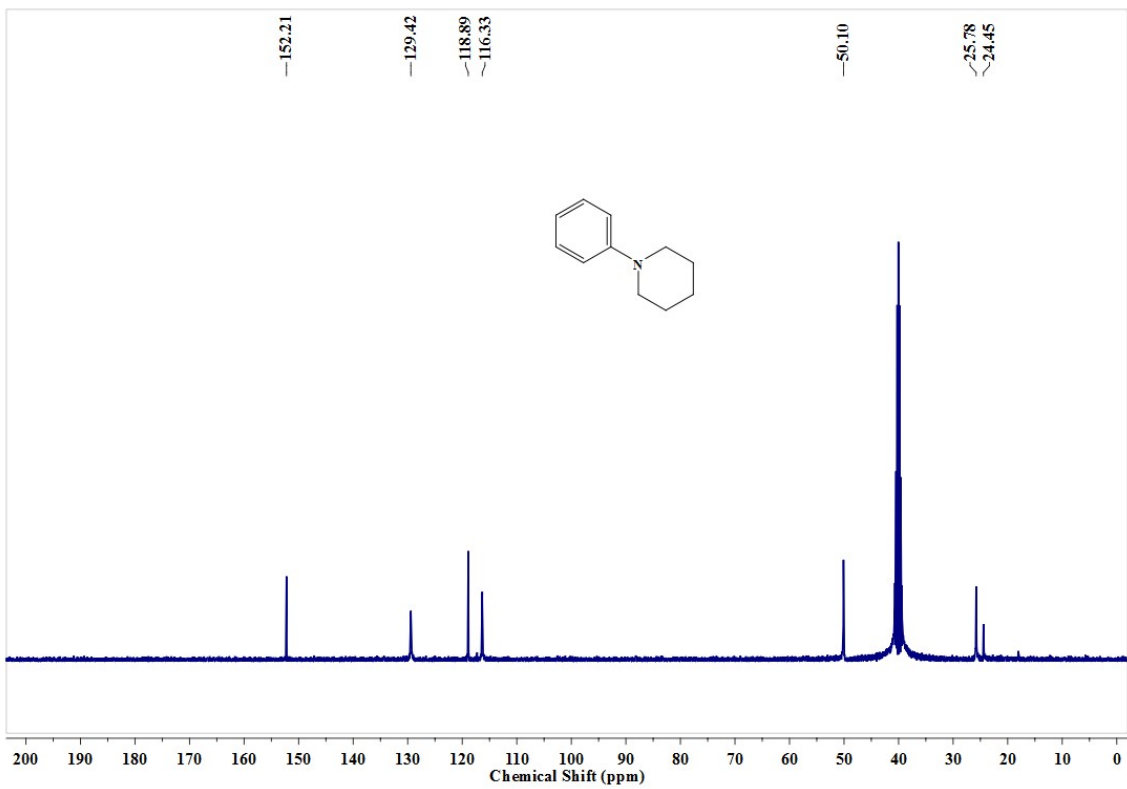

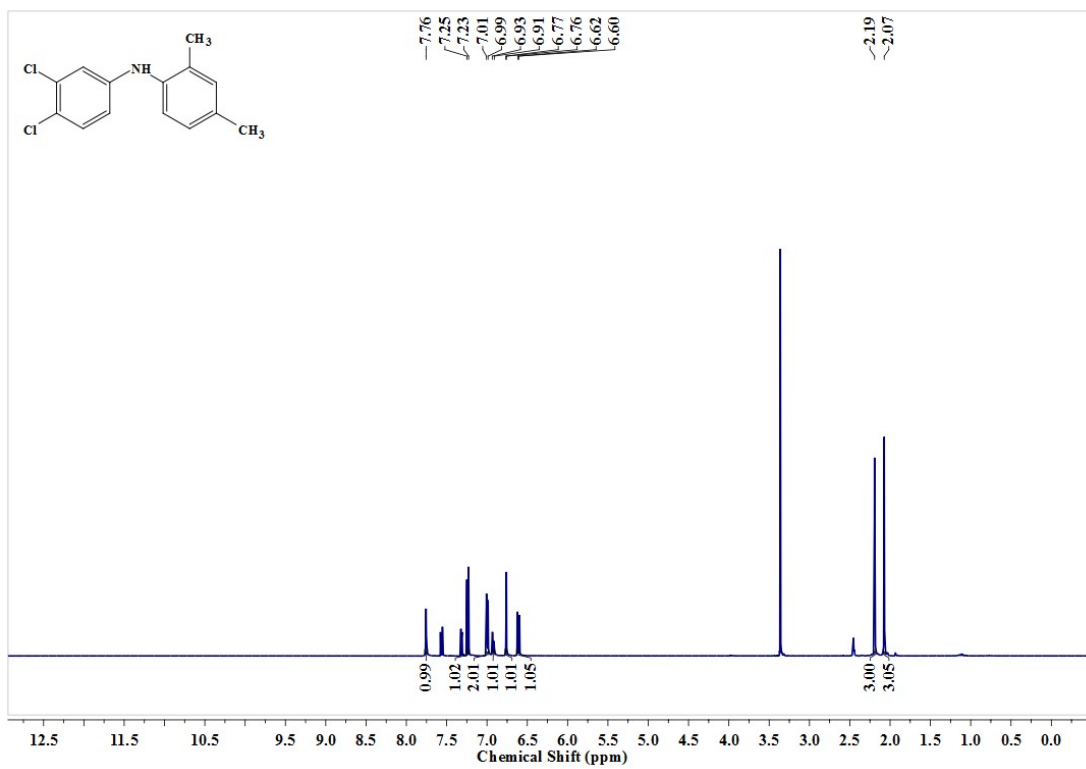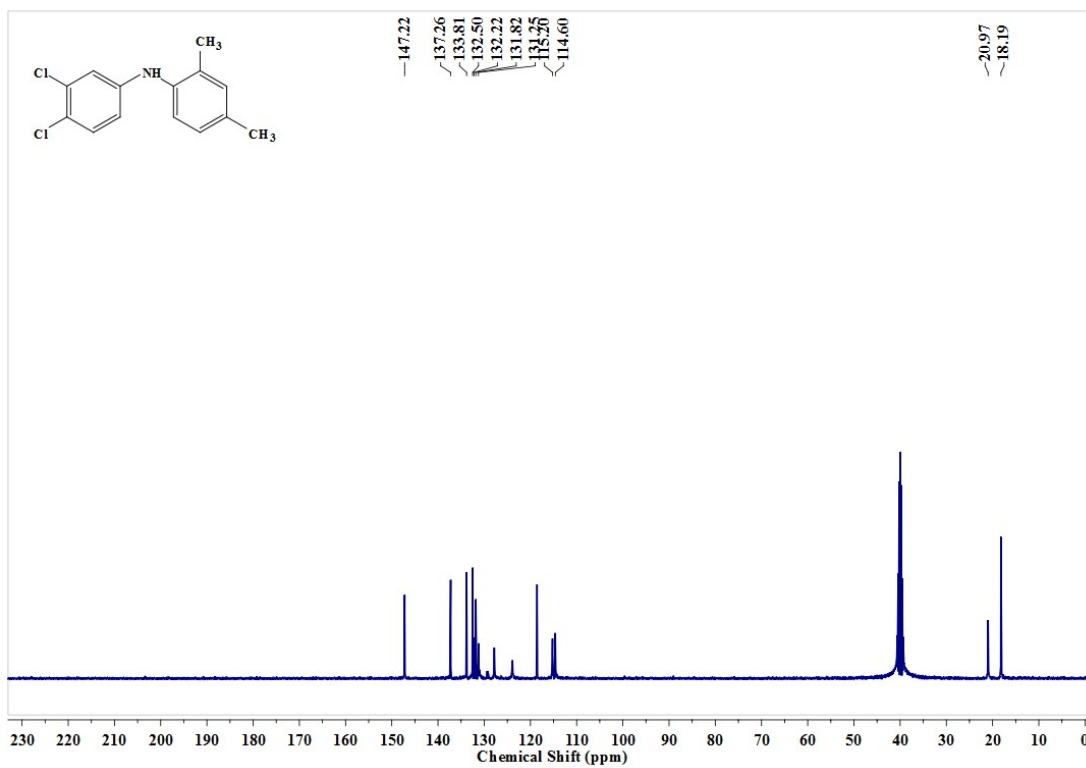

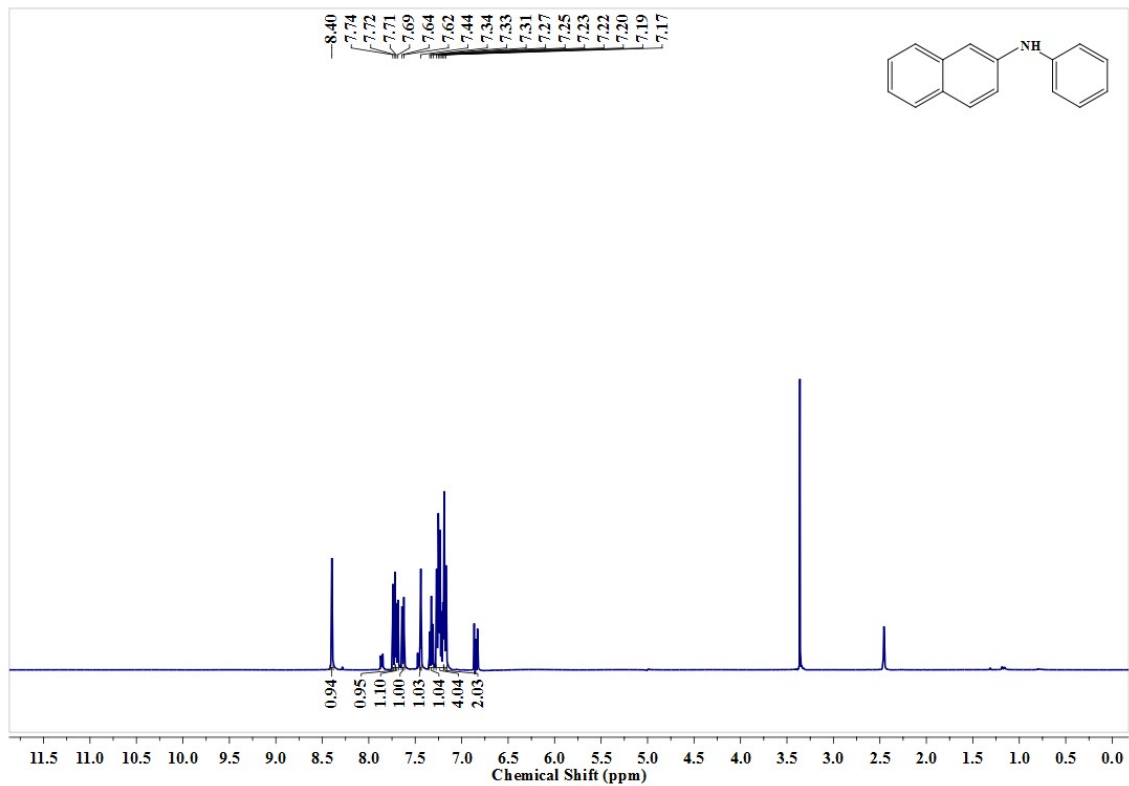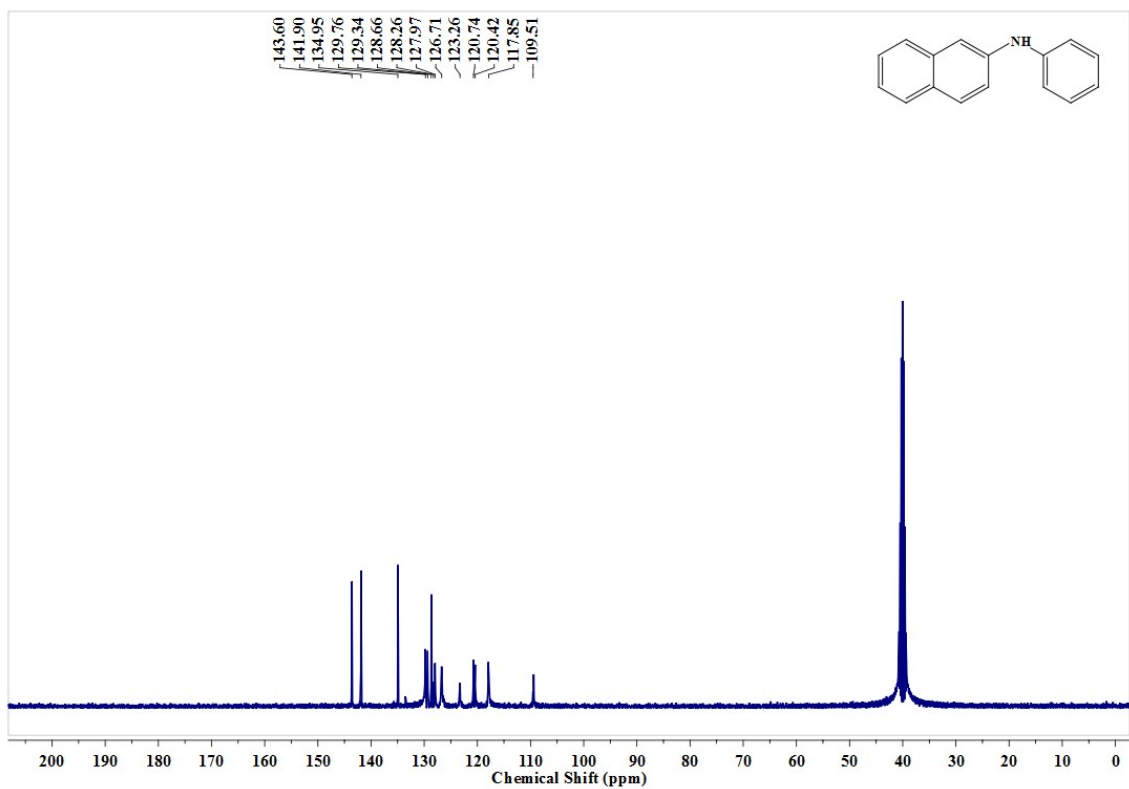

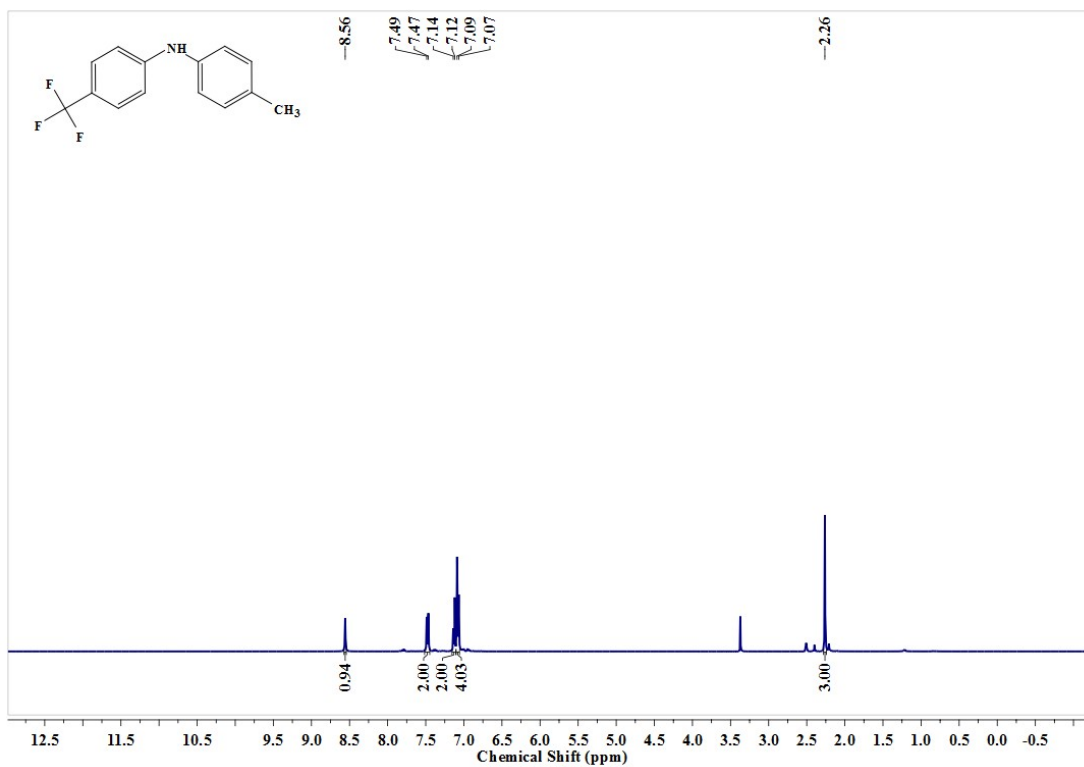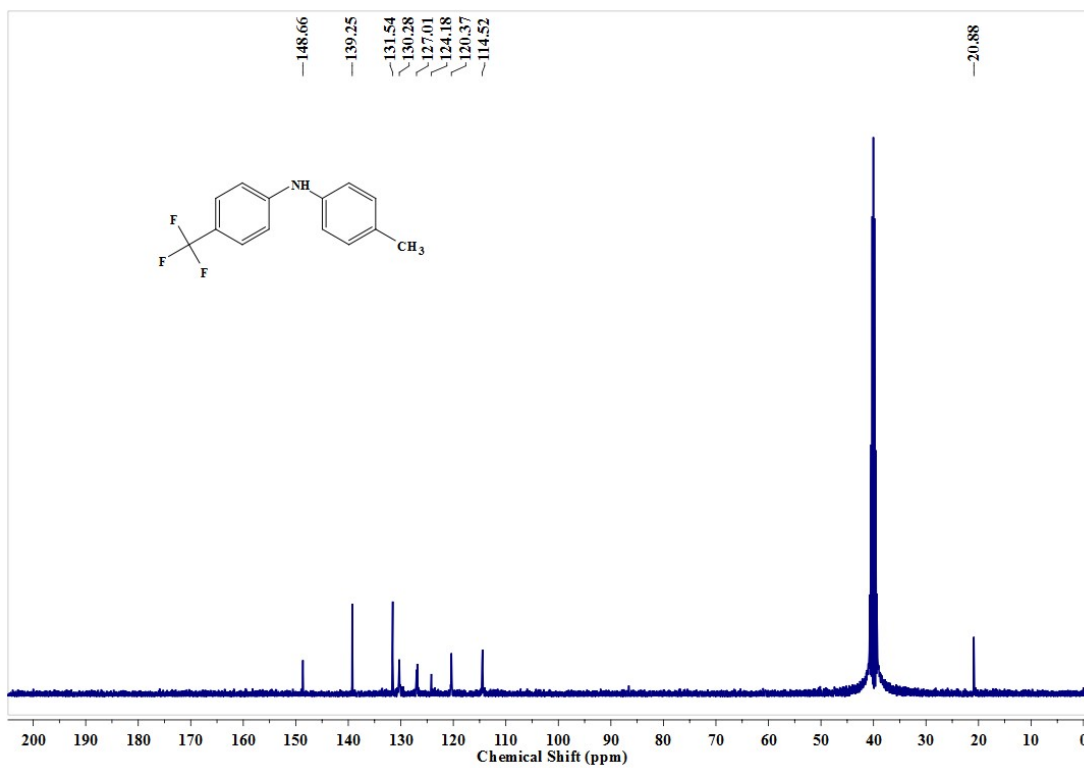

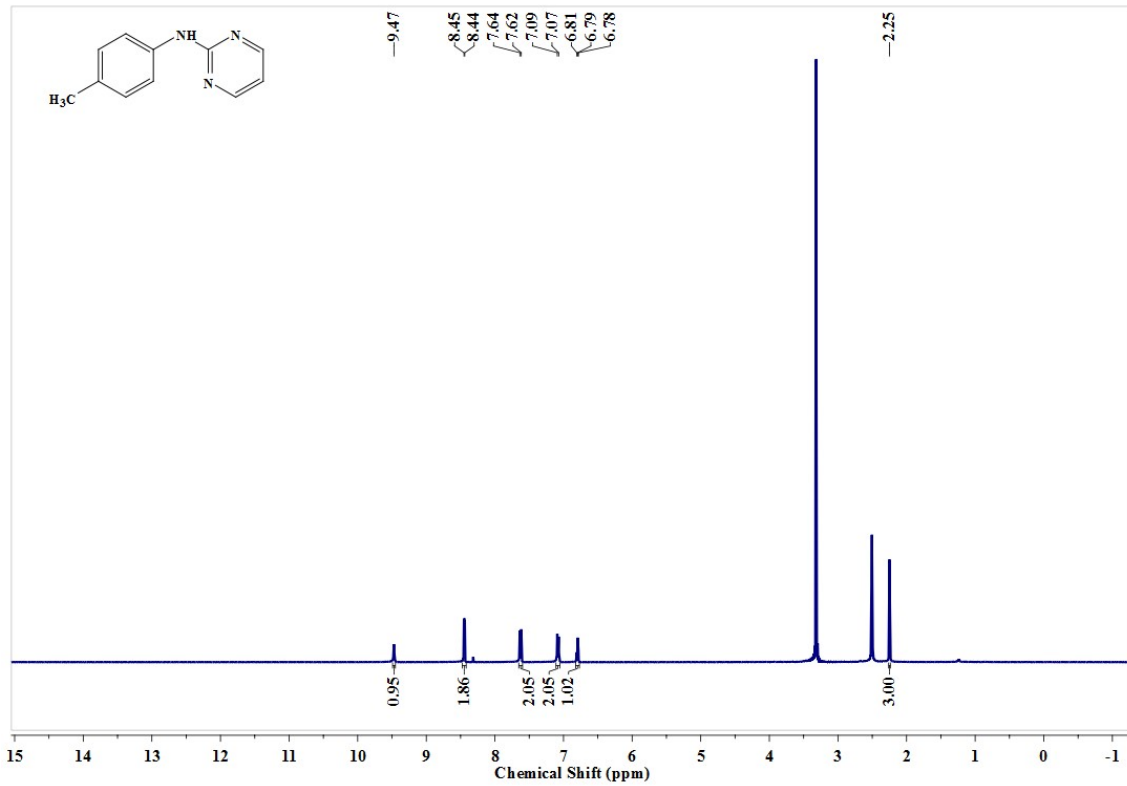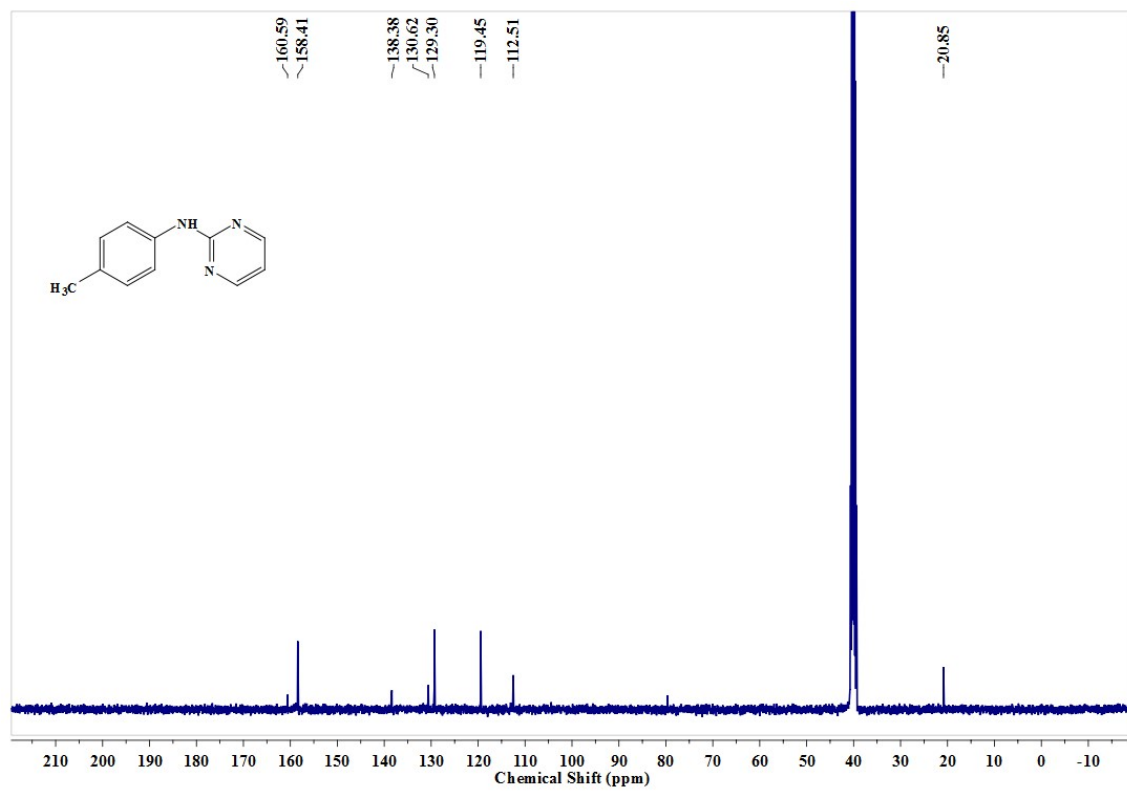

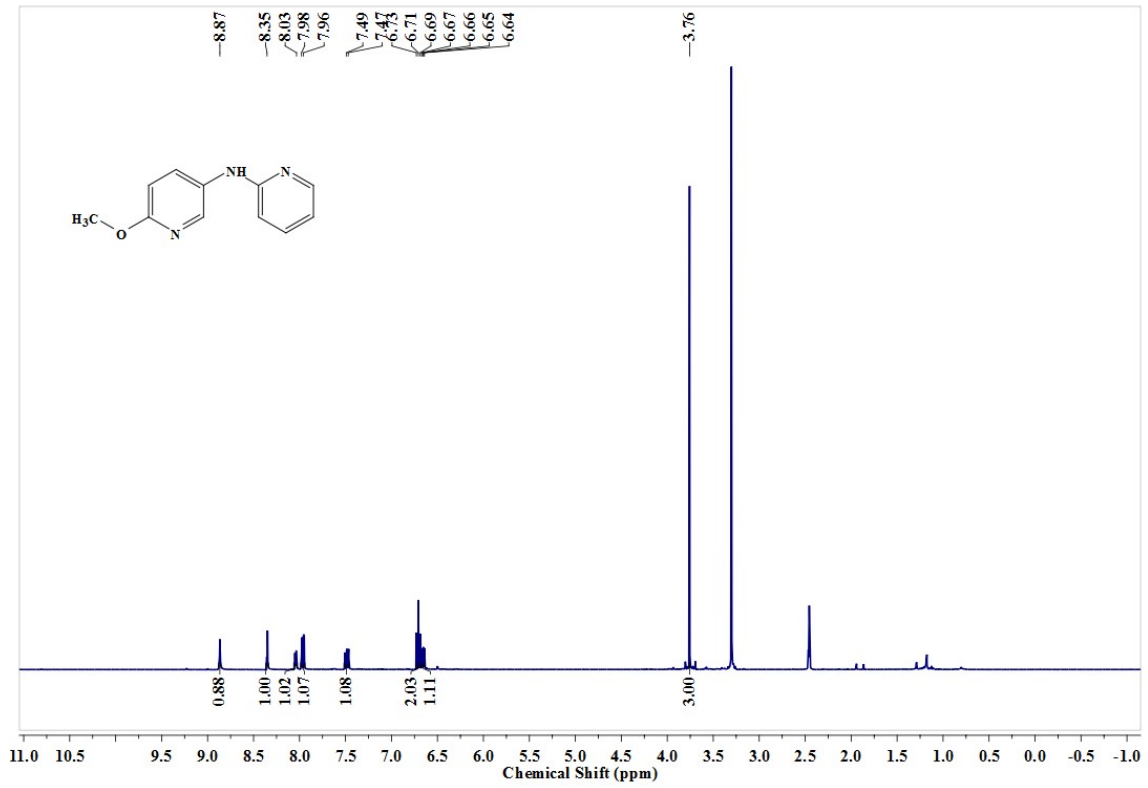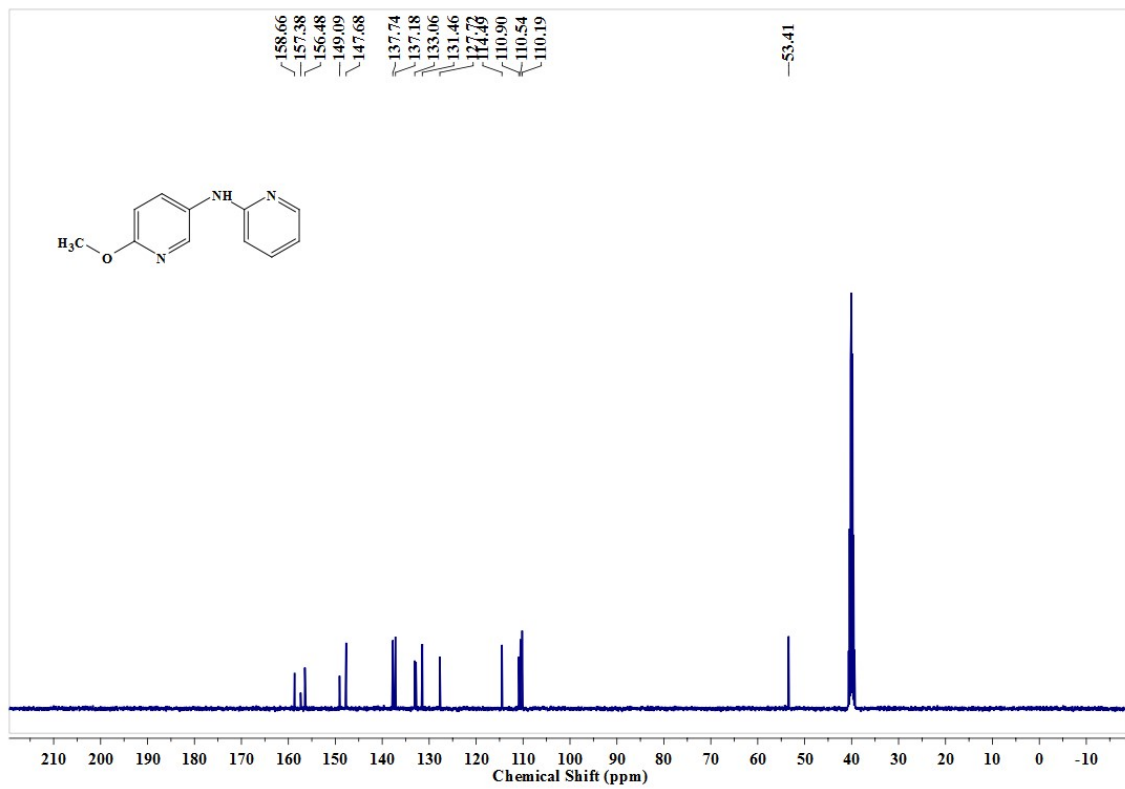

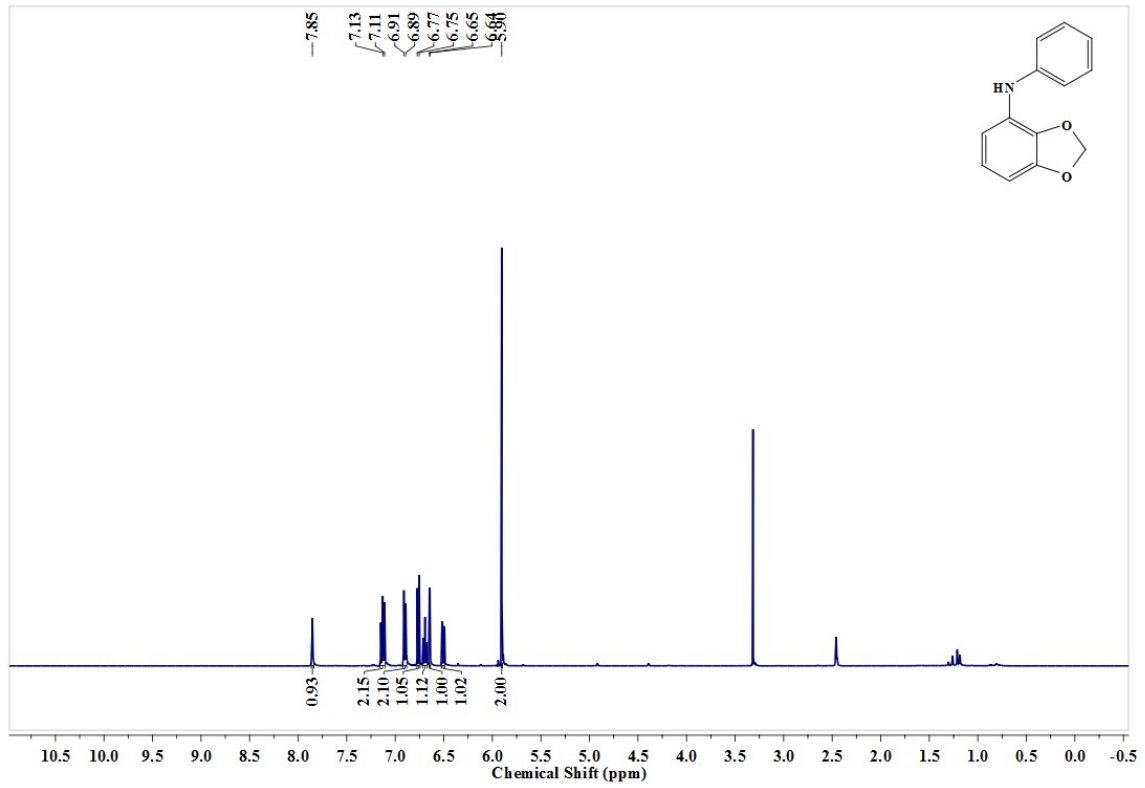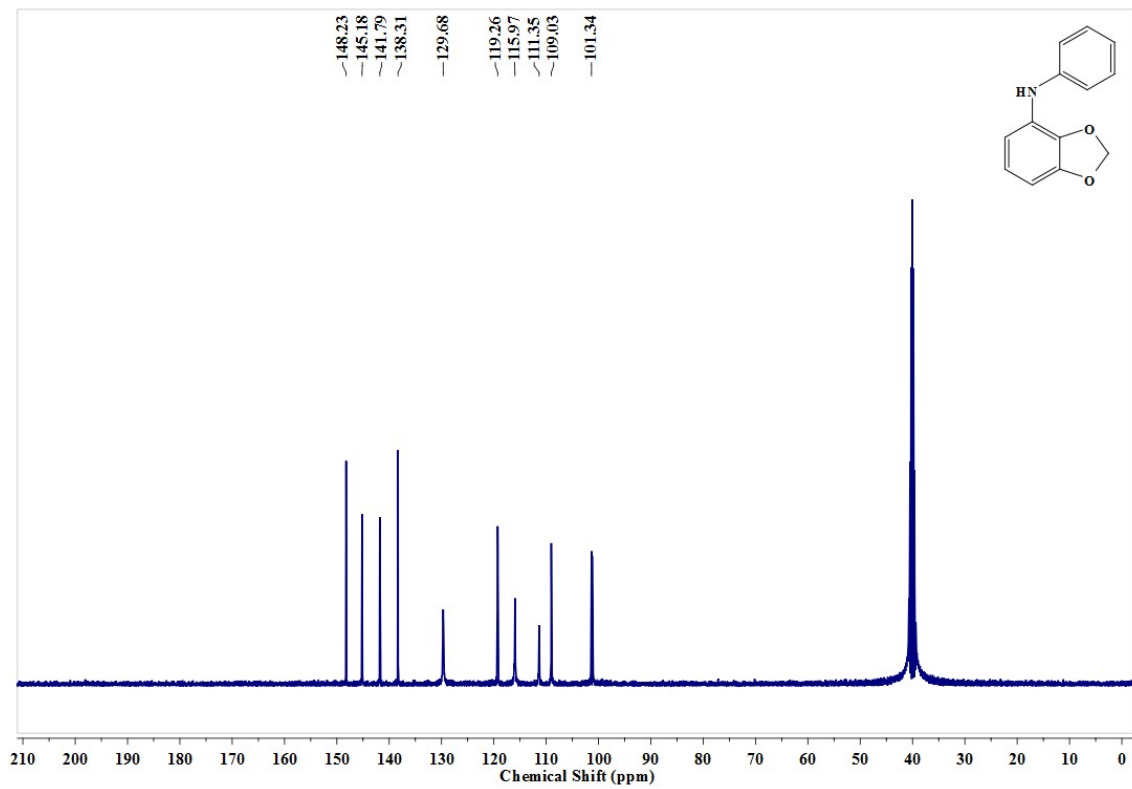

#### 4.2 $^1\text{H}$ and $^{13}\text{C}$ NMR spectra of 3-arylamino phenols (5)

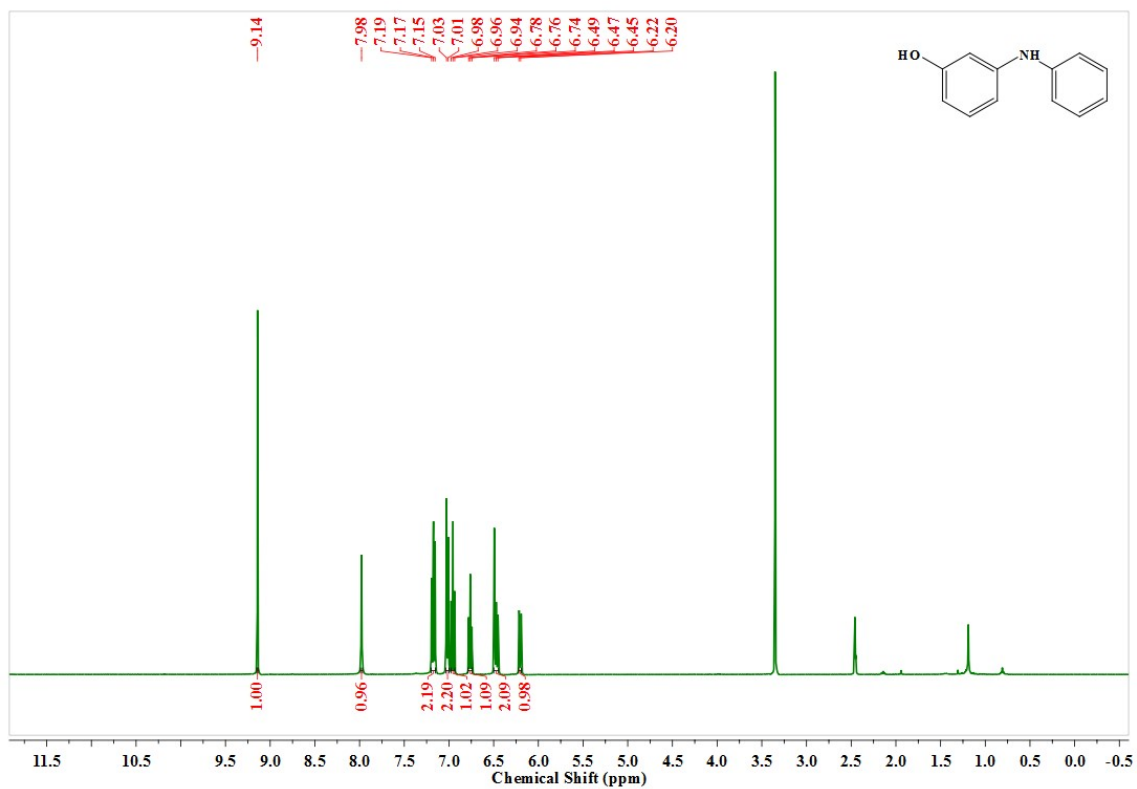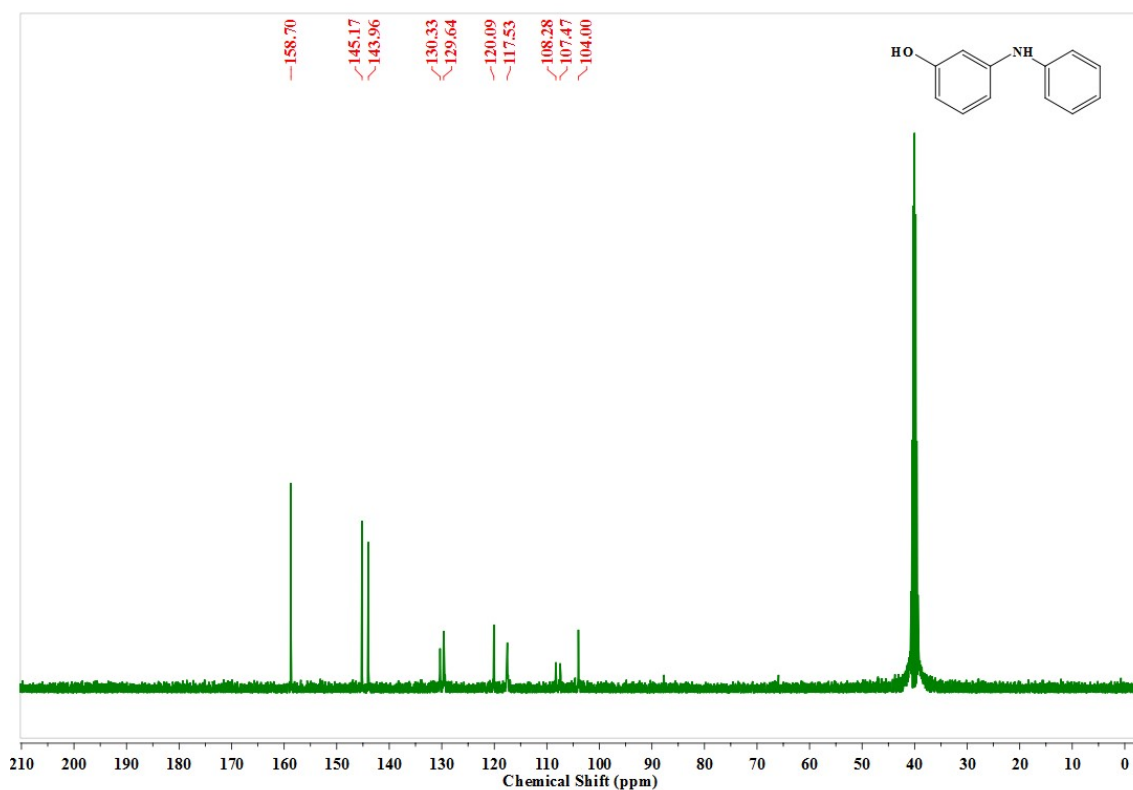



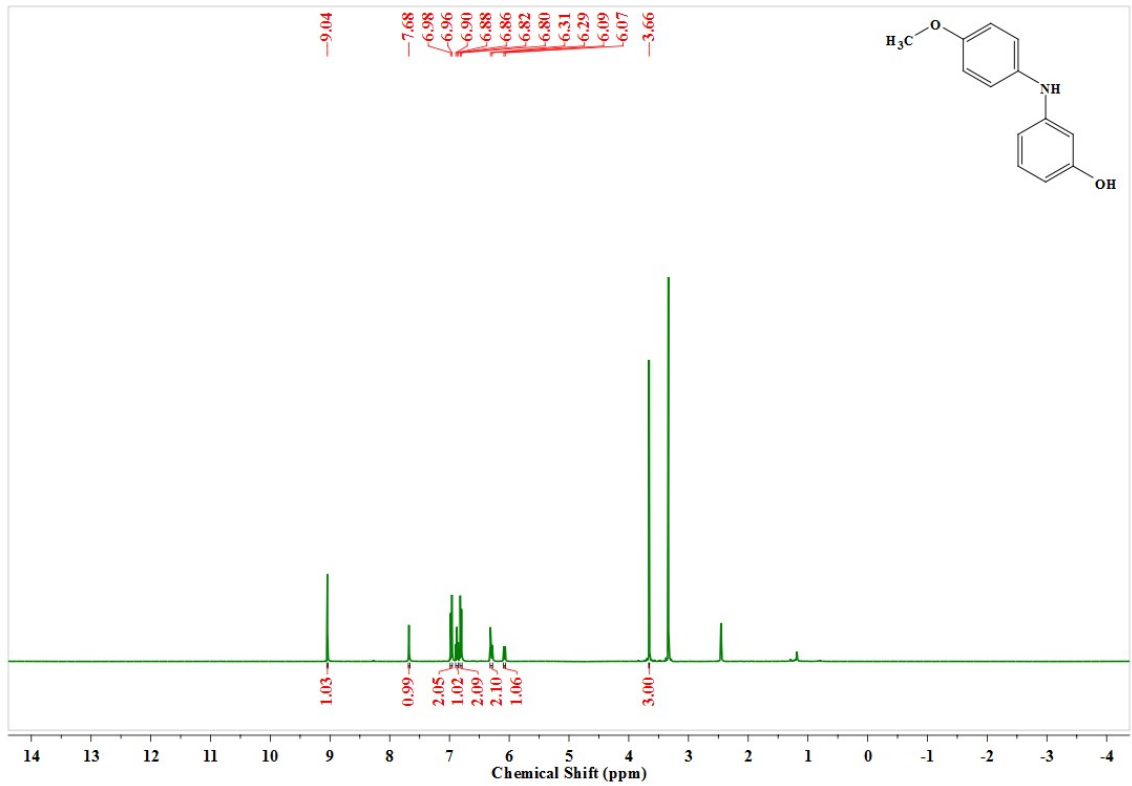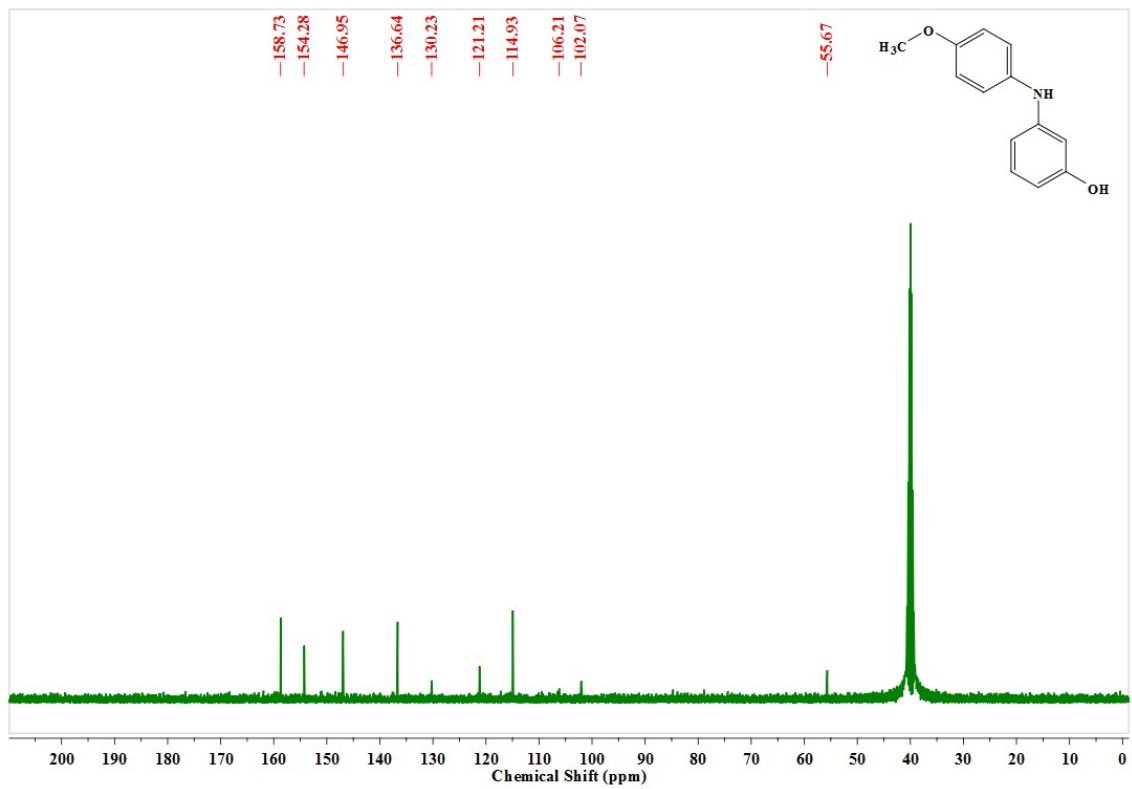

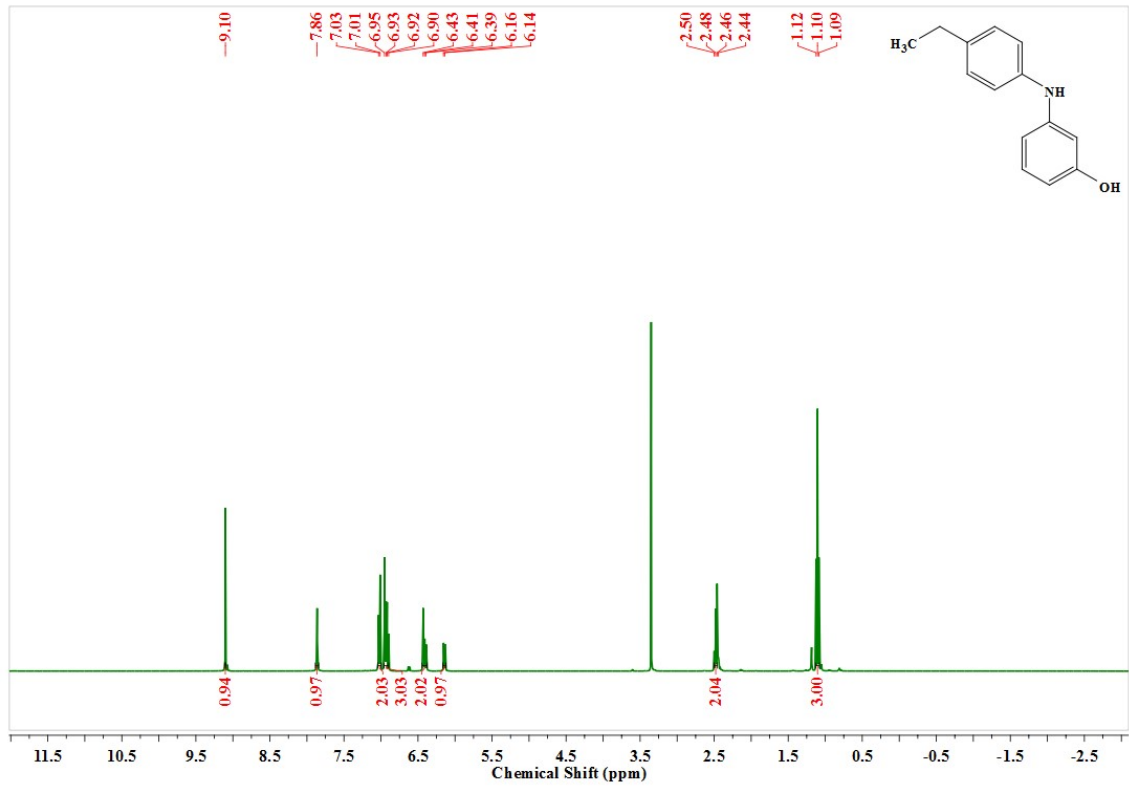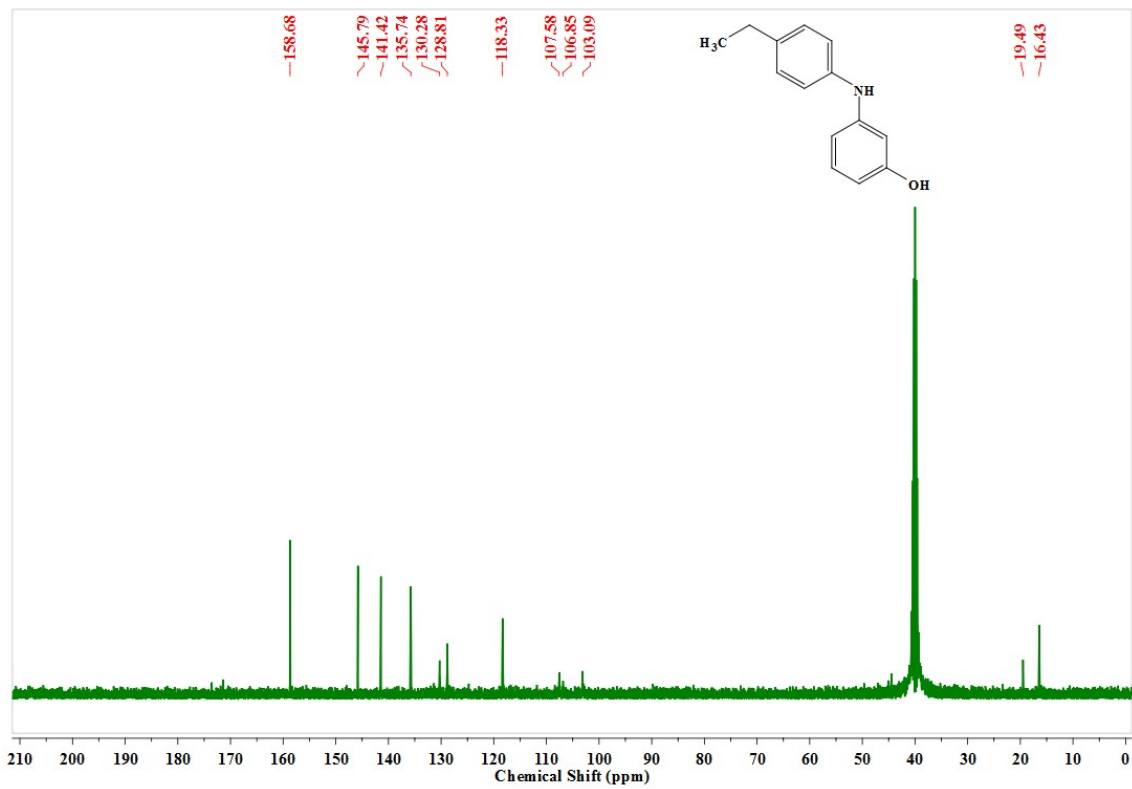

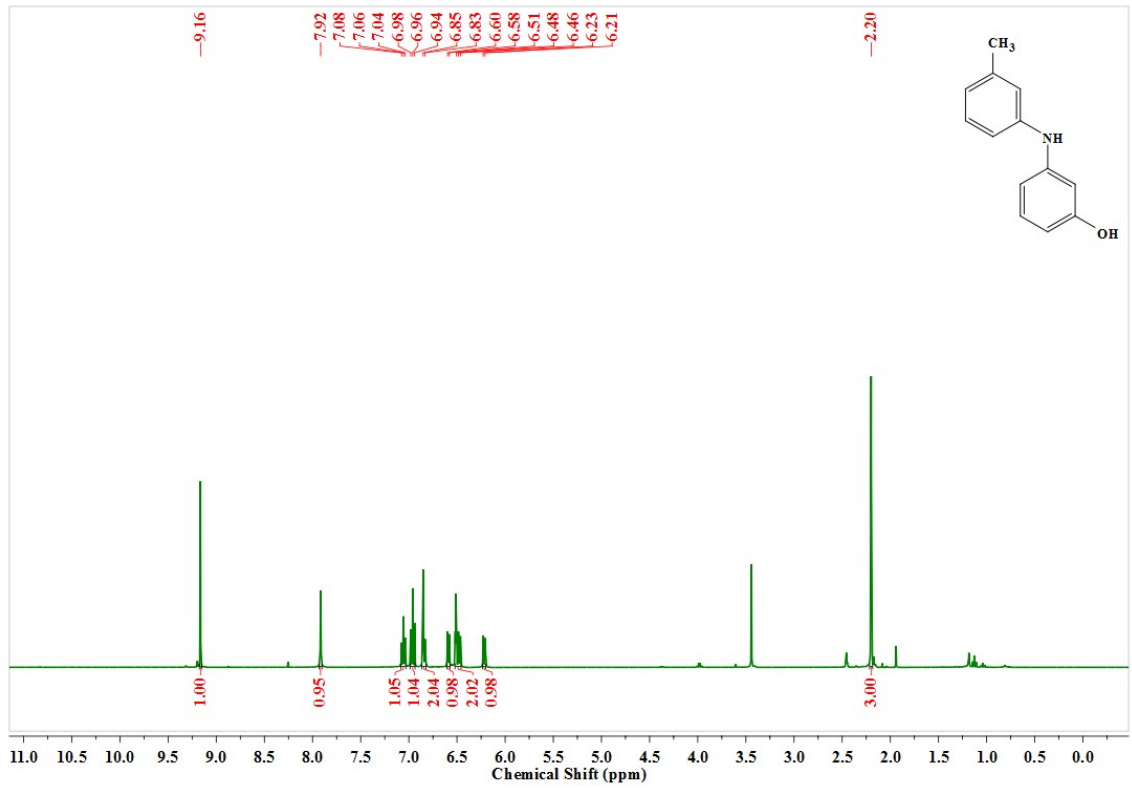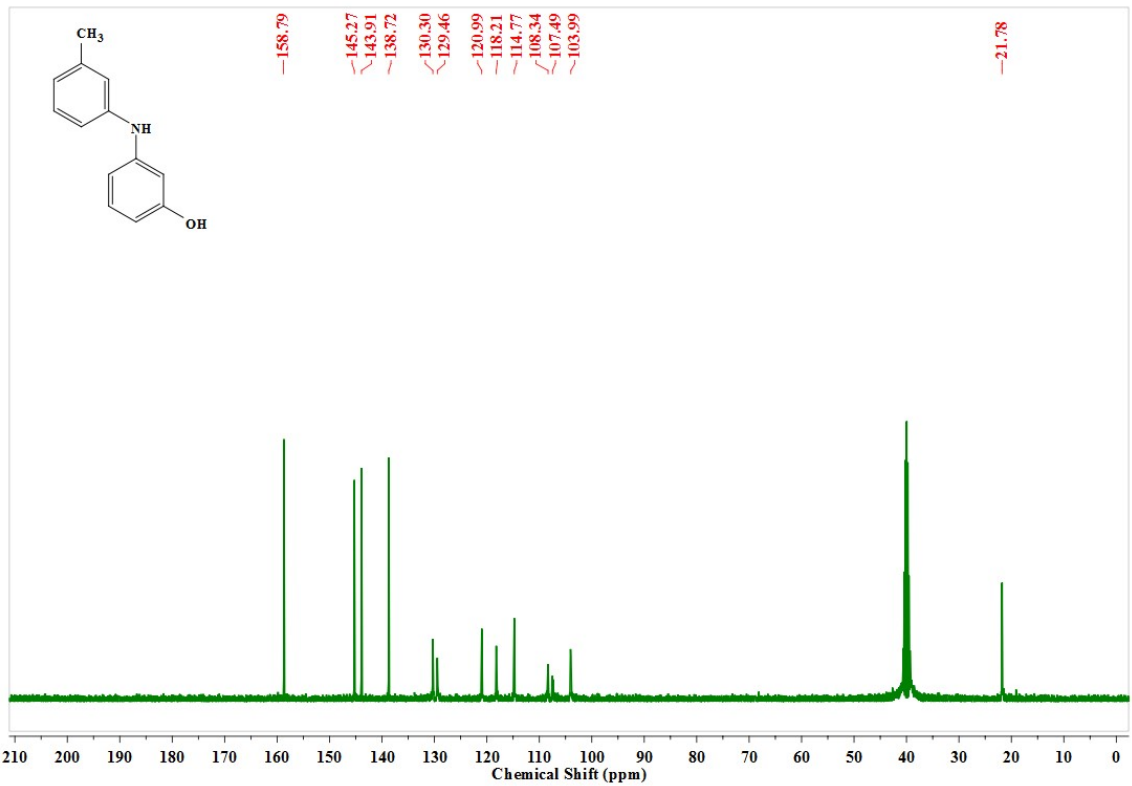

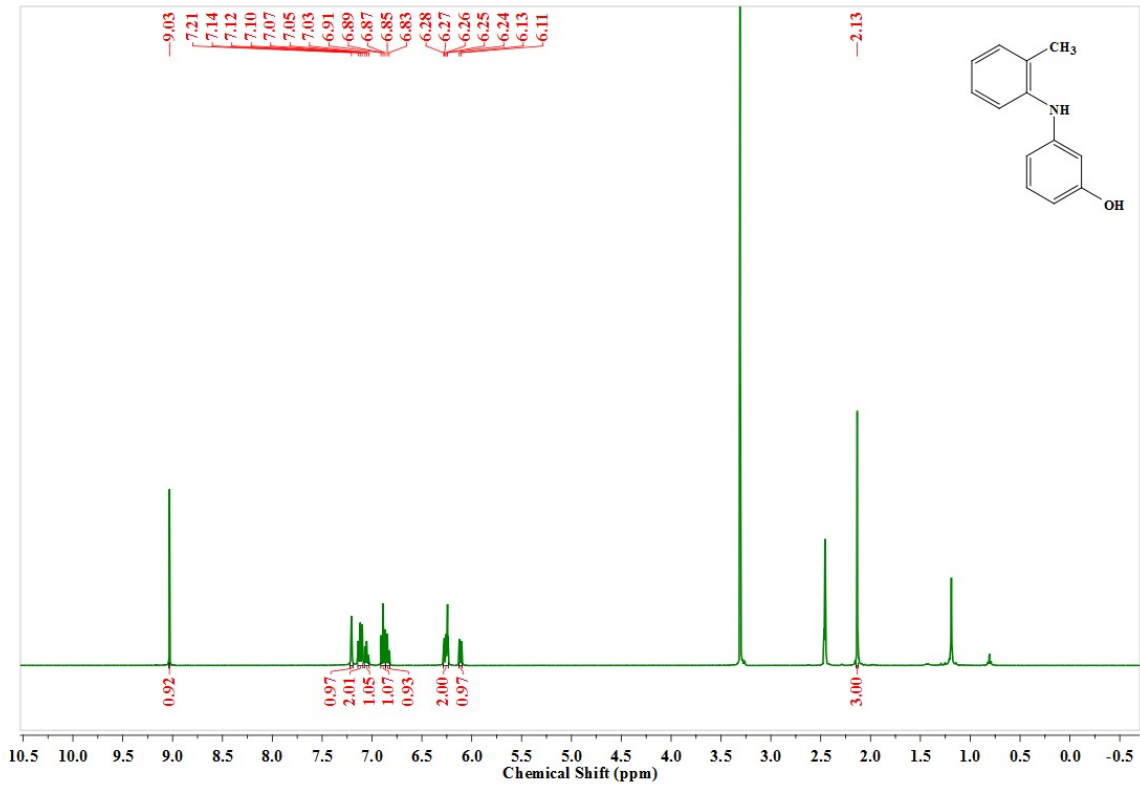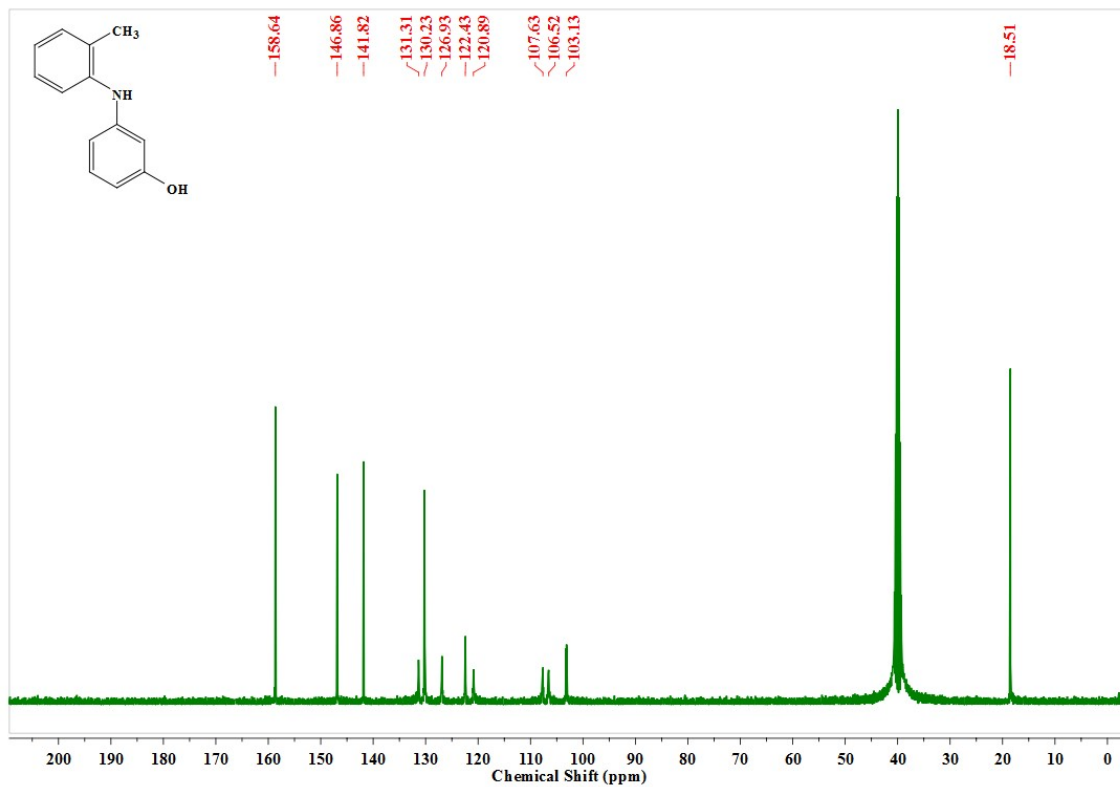

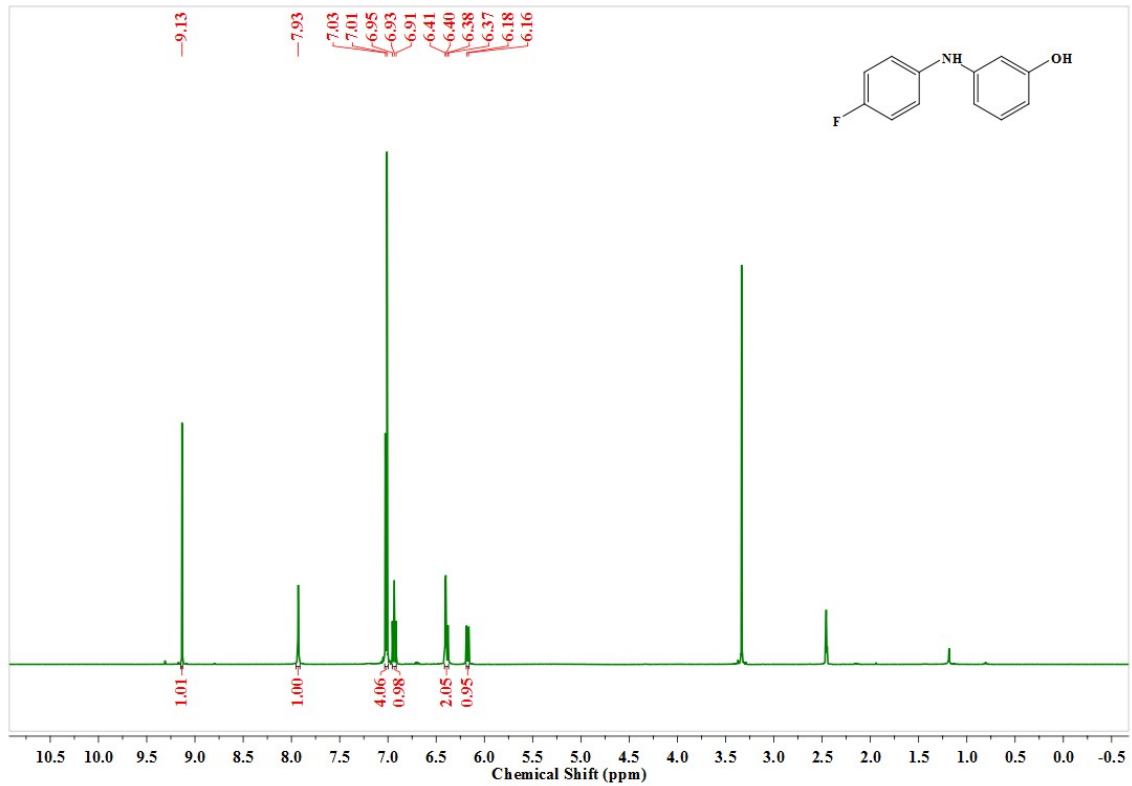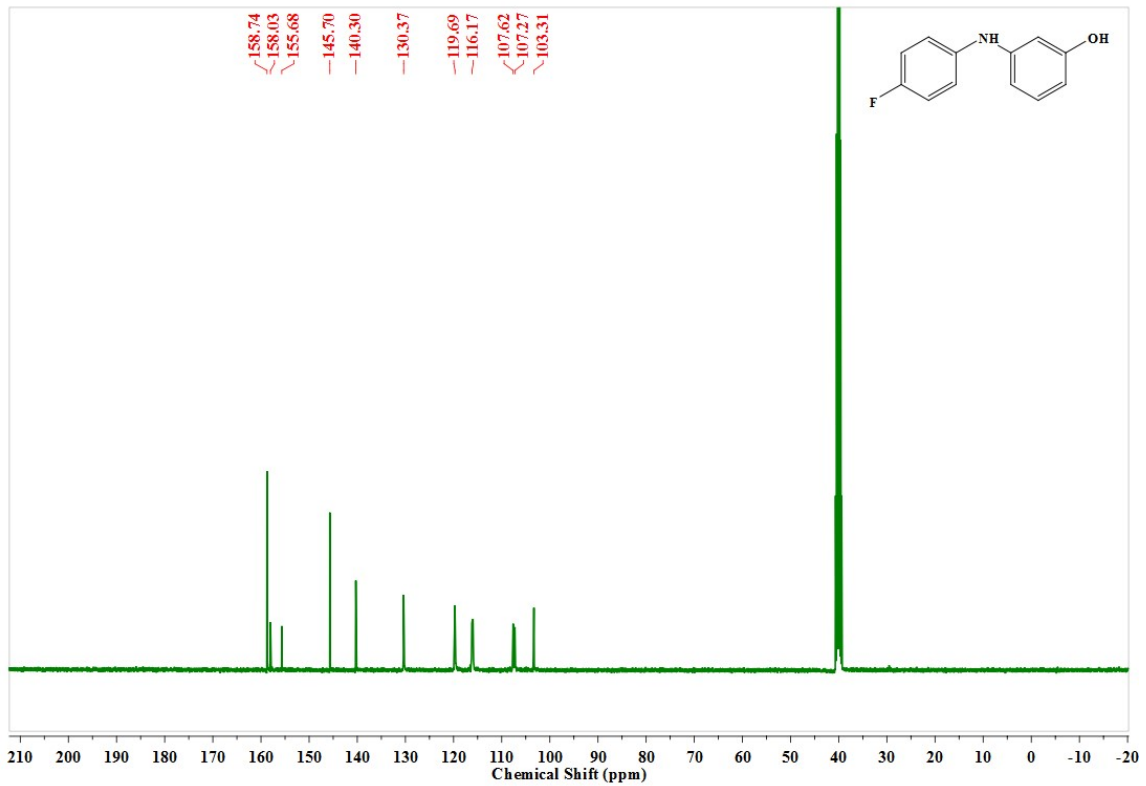

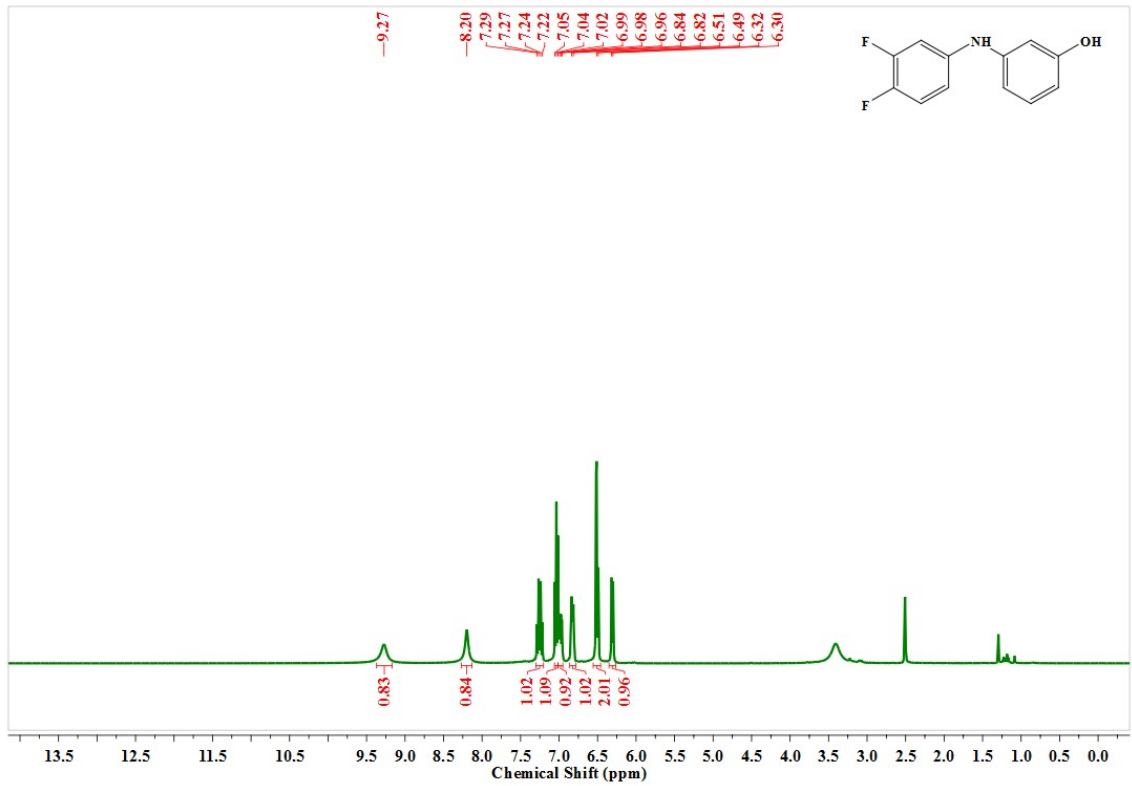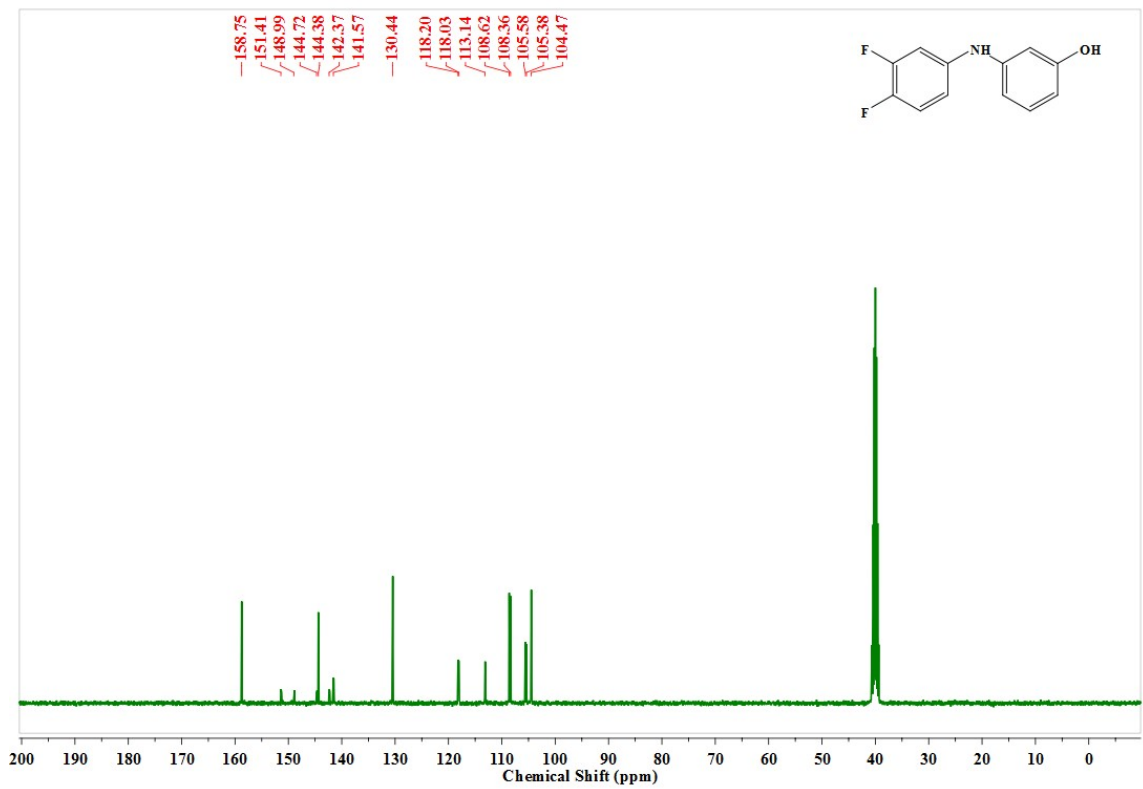

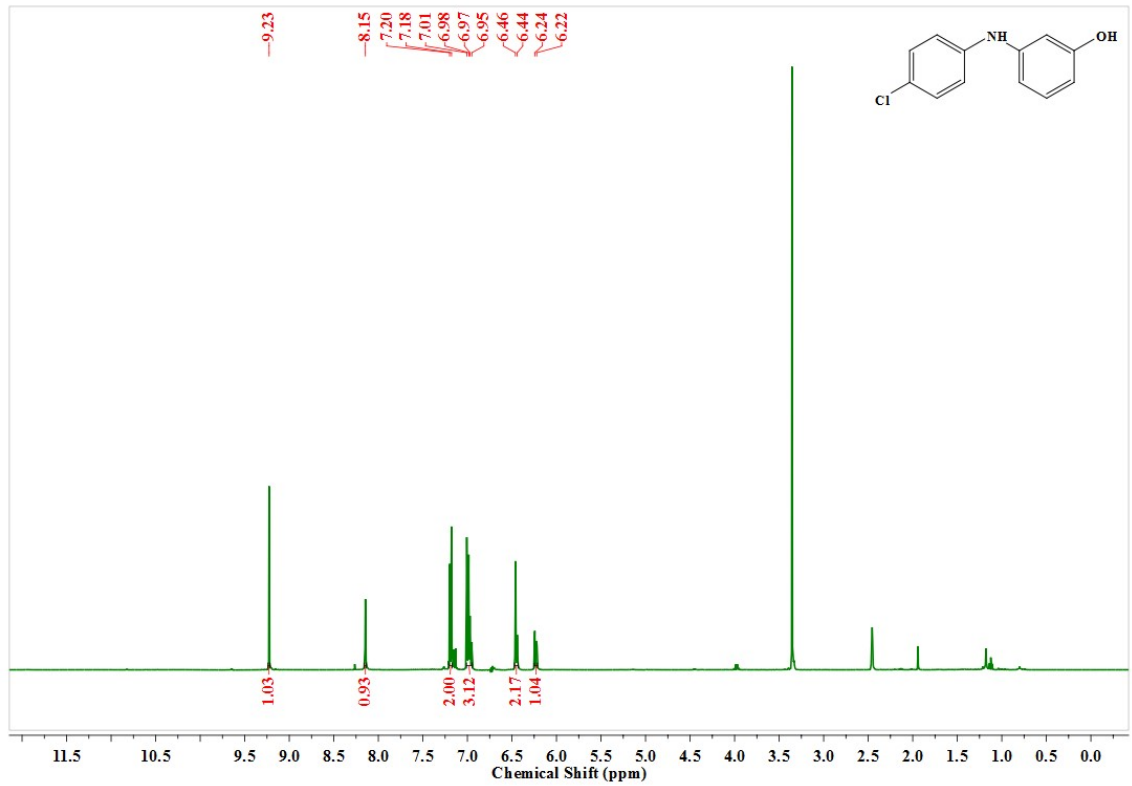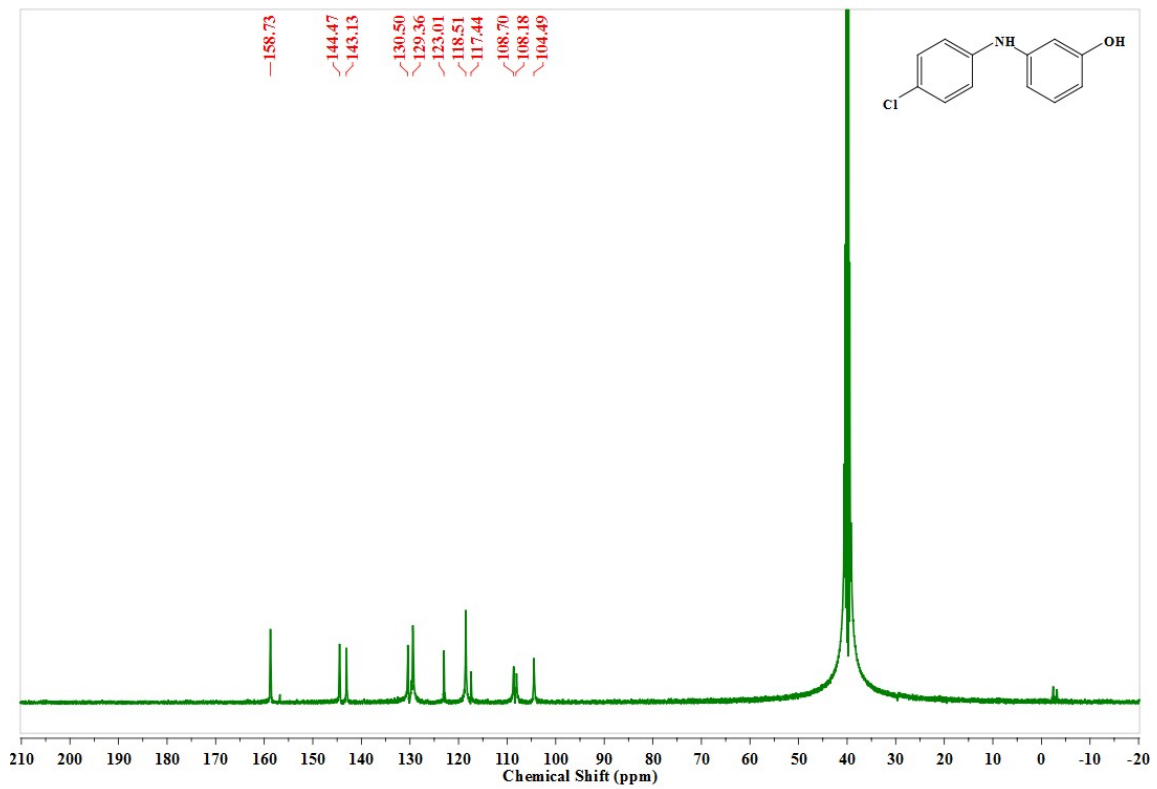

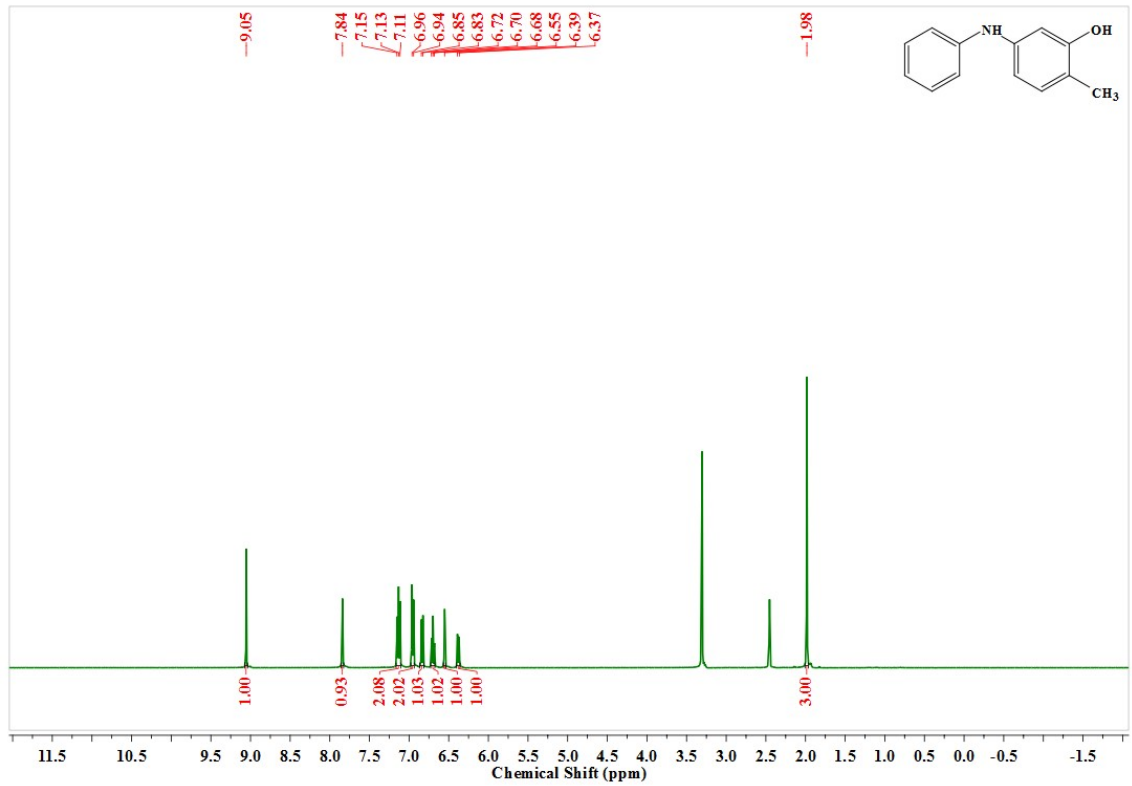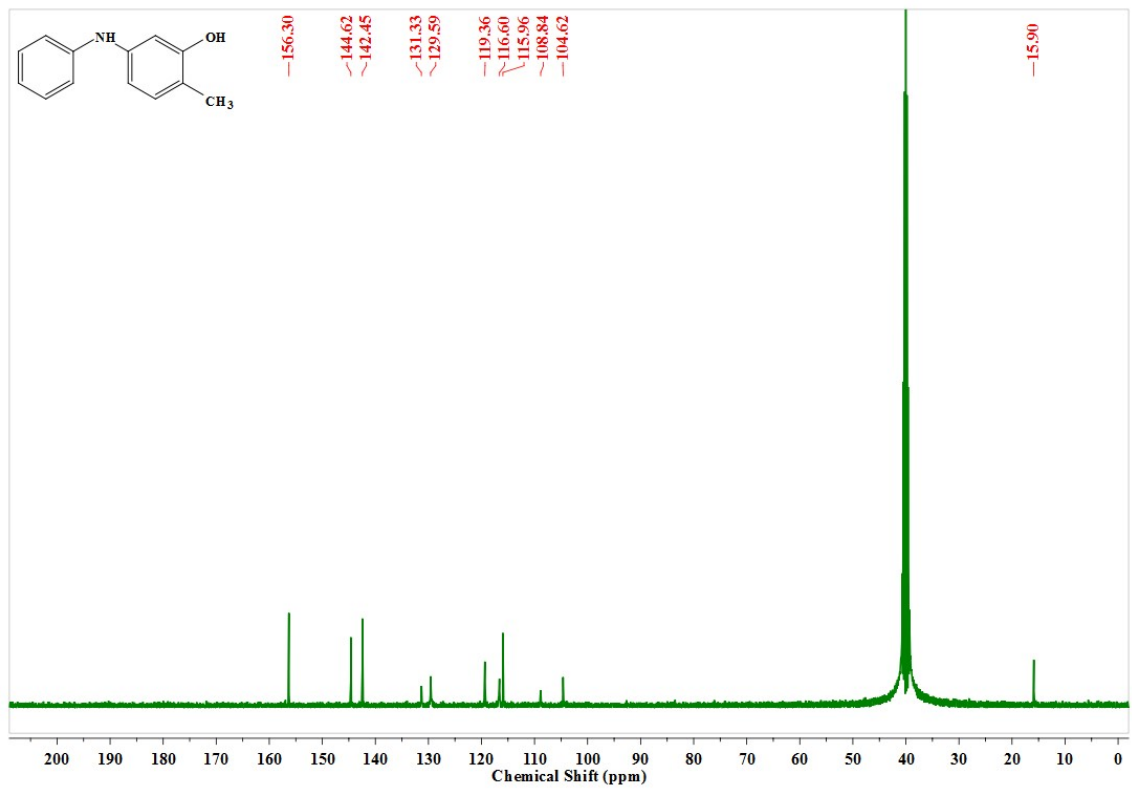



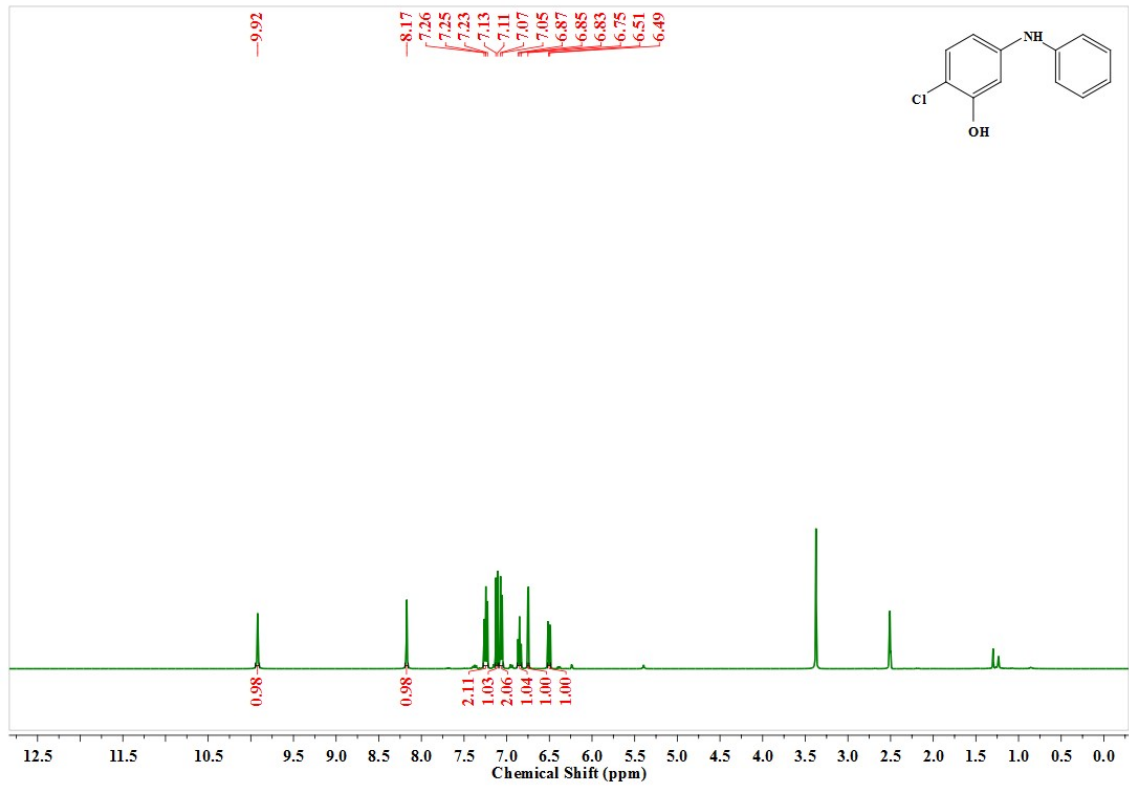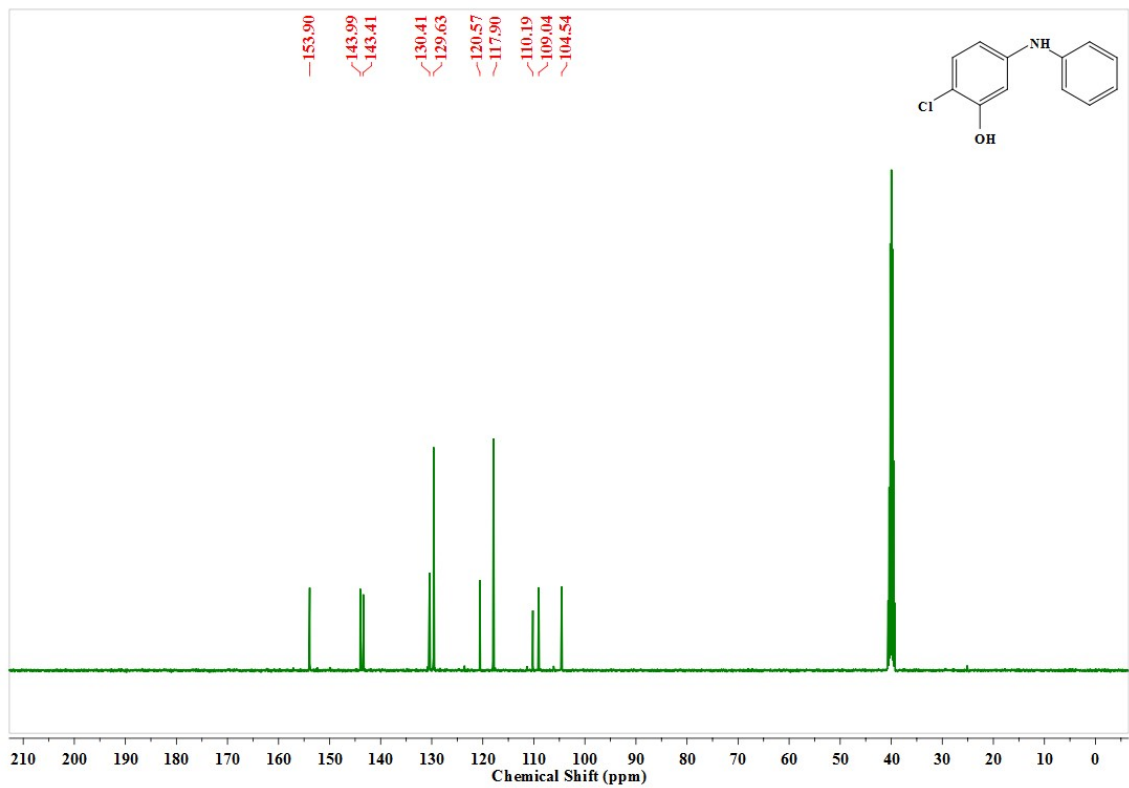

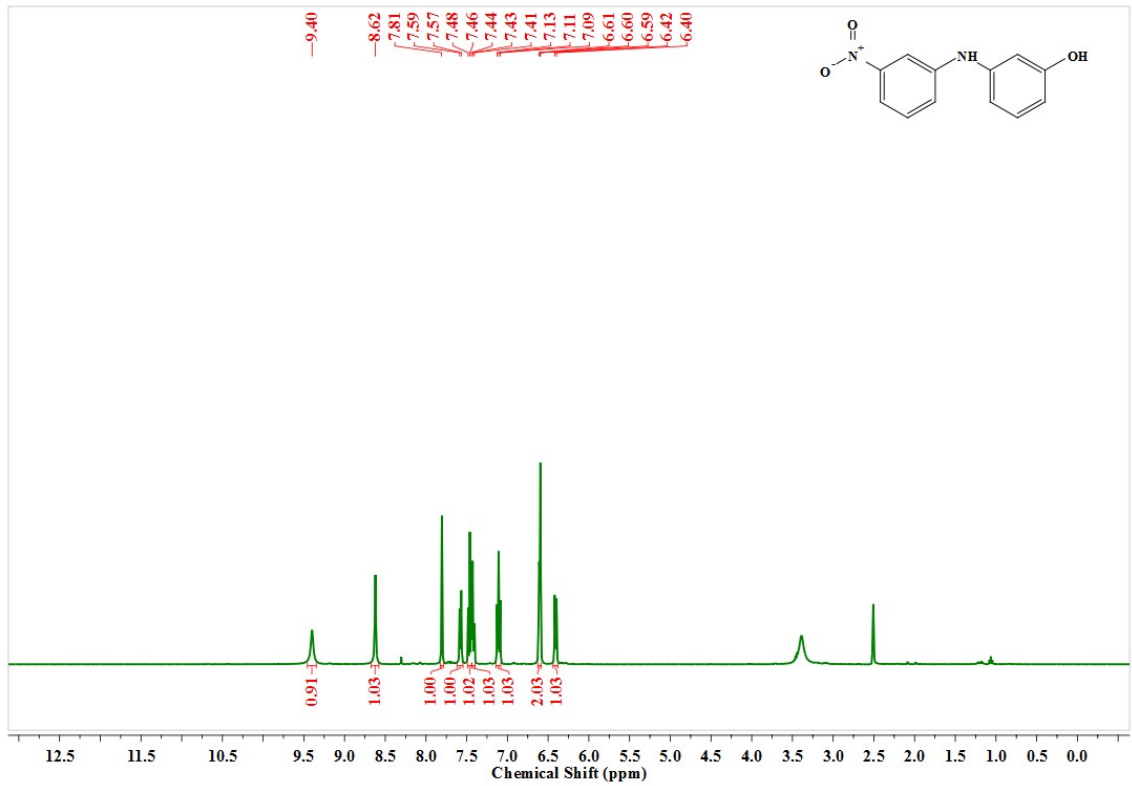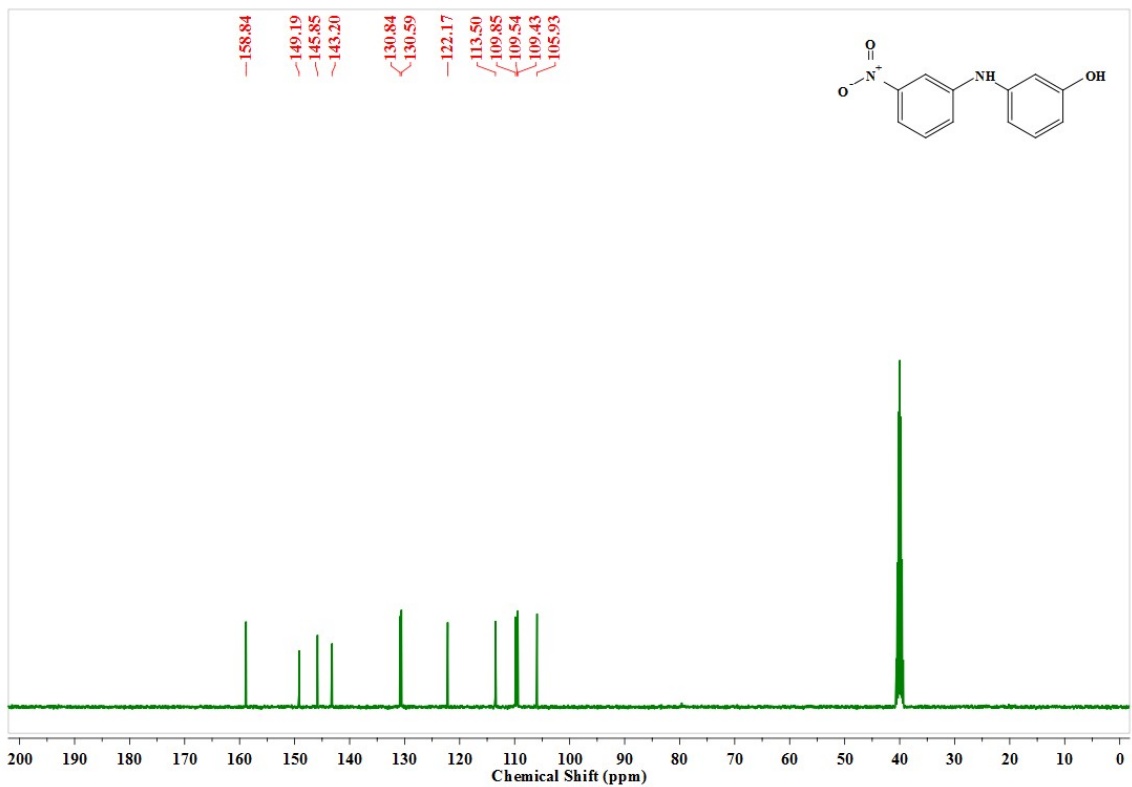

### 4.3 $^1\text{H}$ and $^{13}\text{C}$ NMR spectra of 3-arylamides (7)

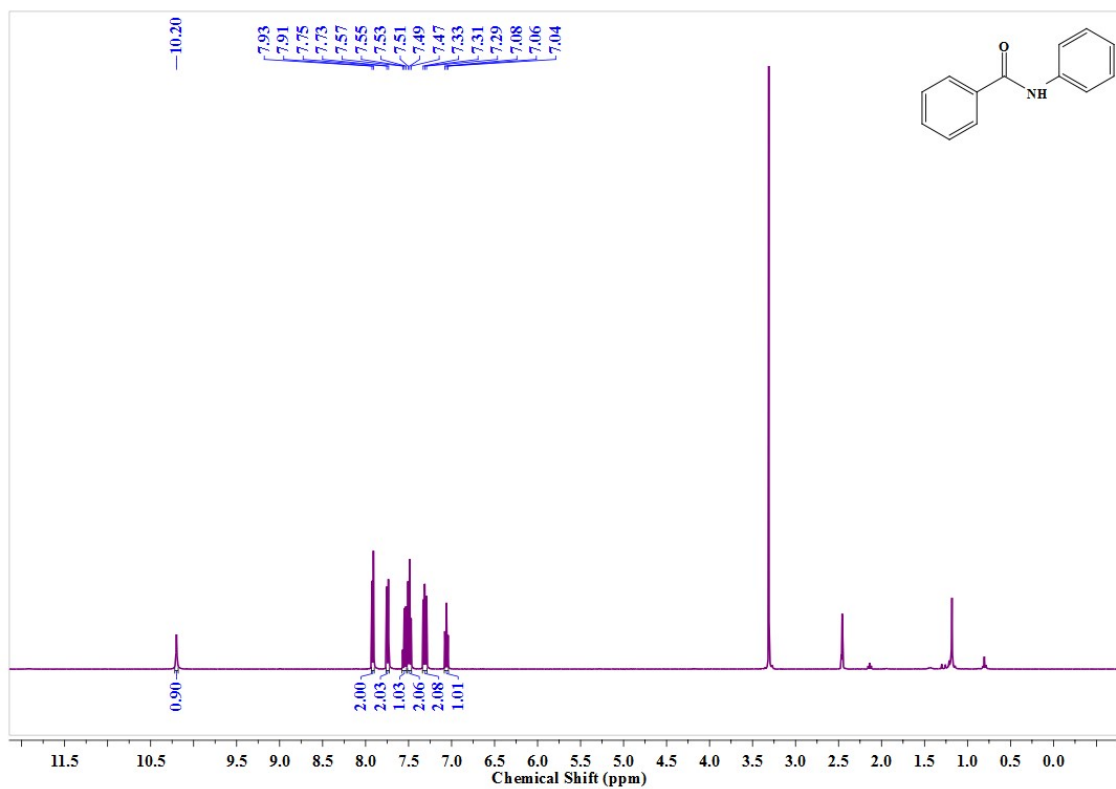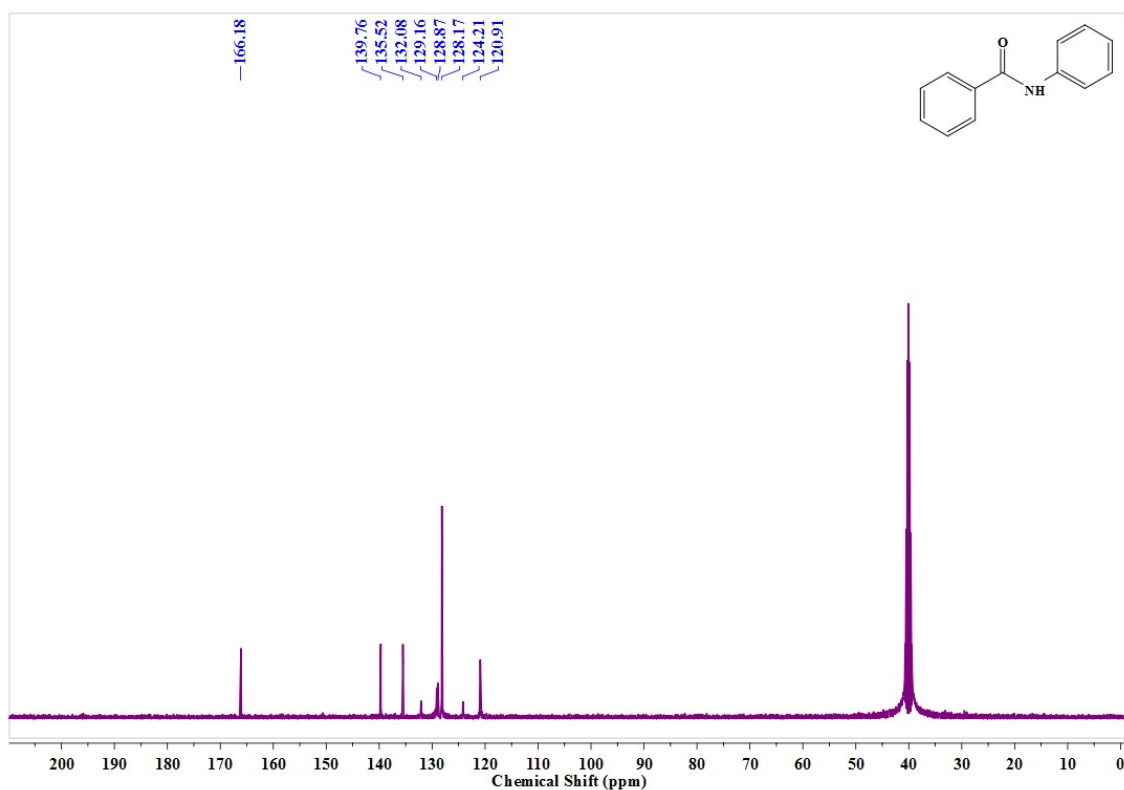

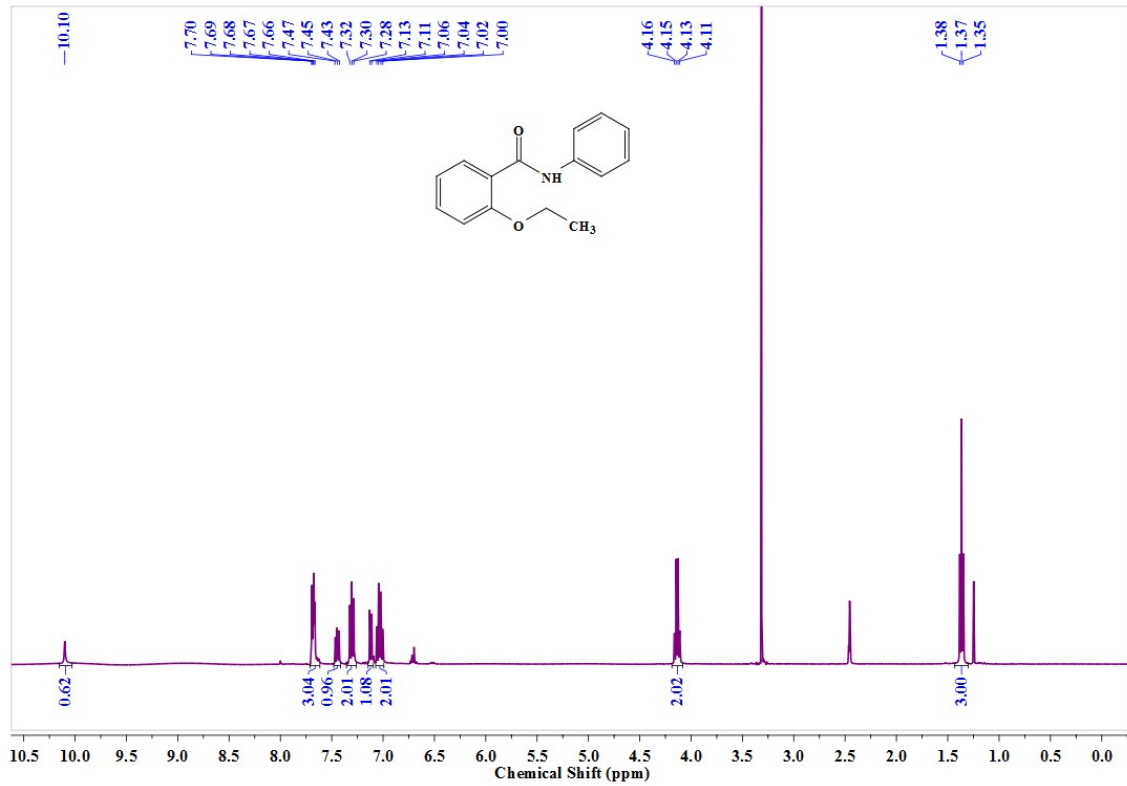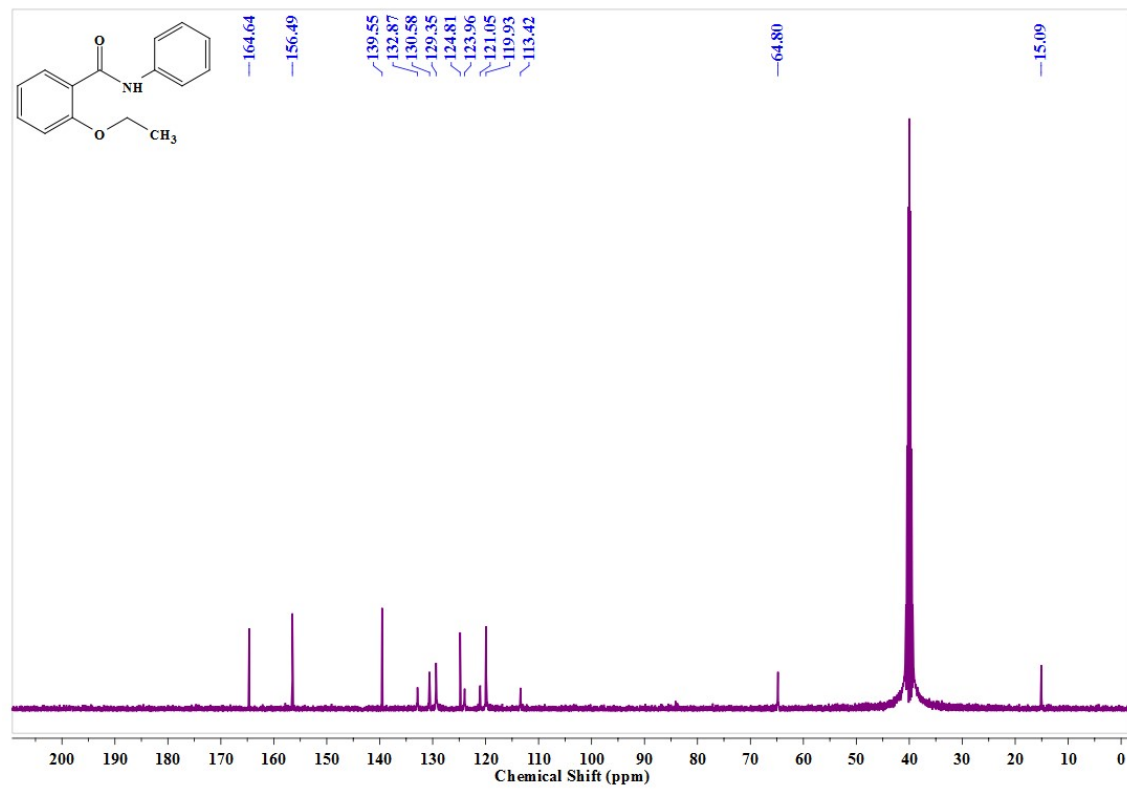

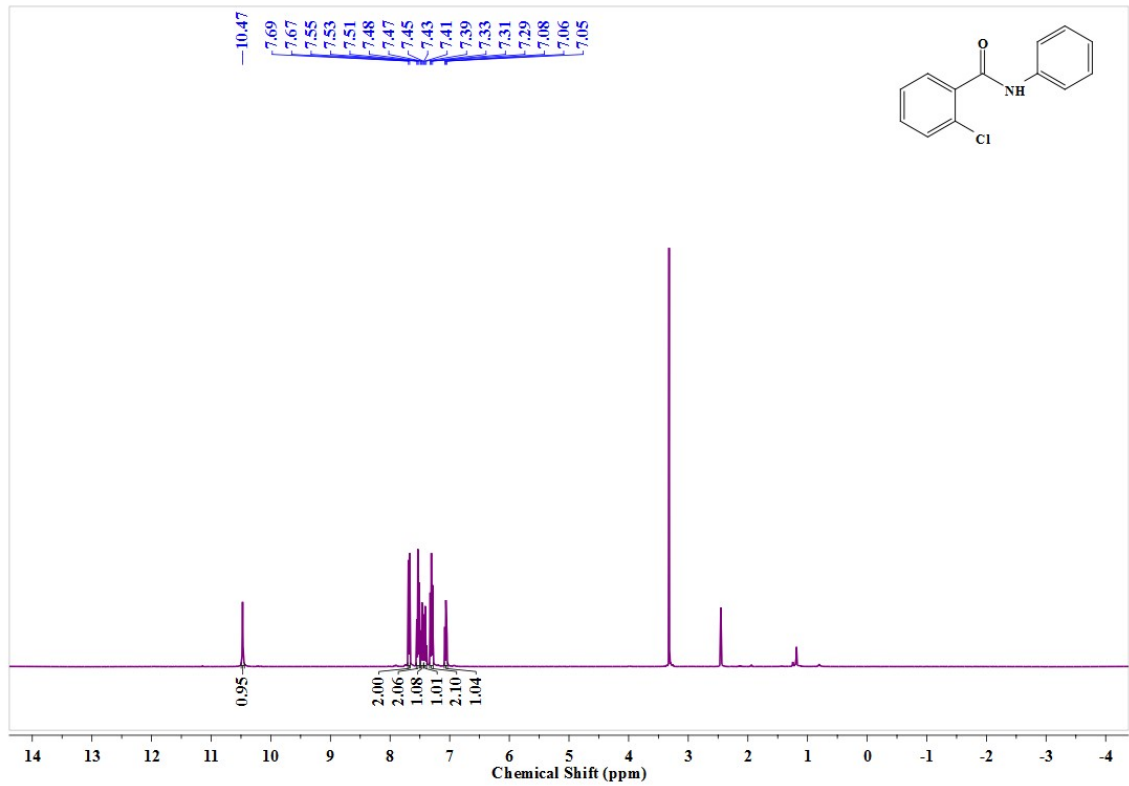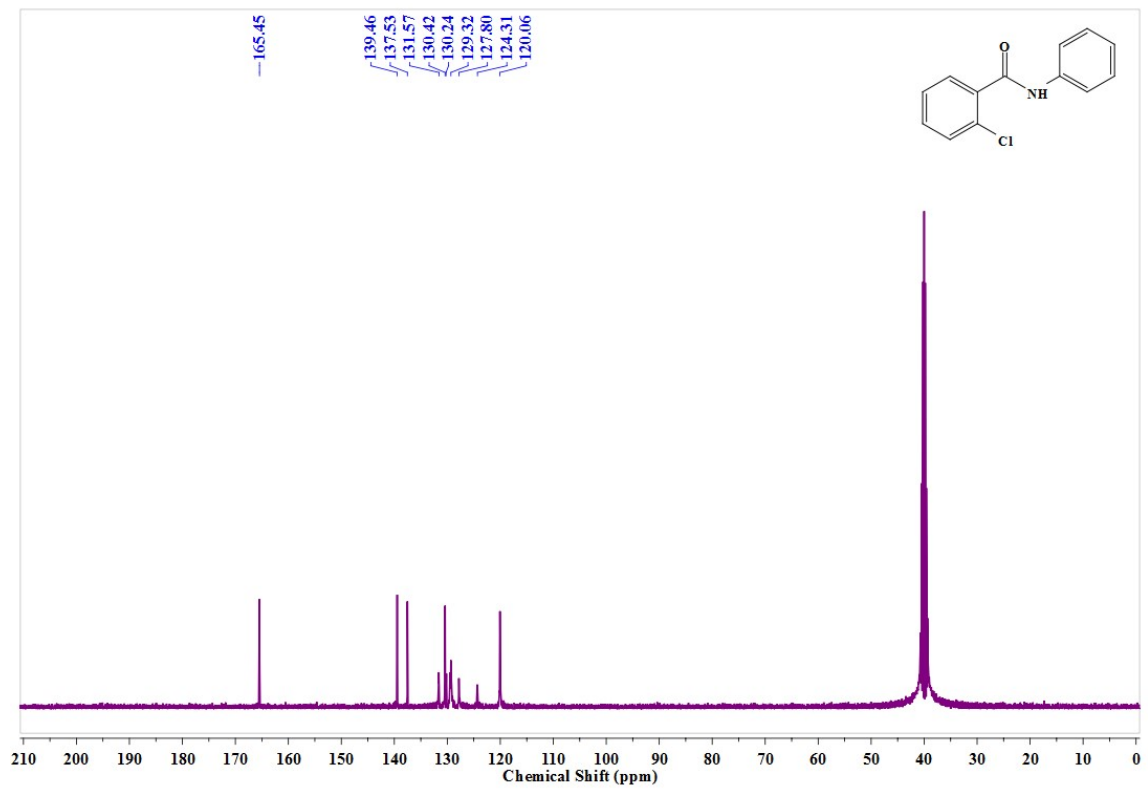

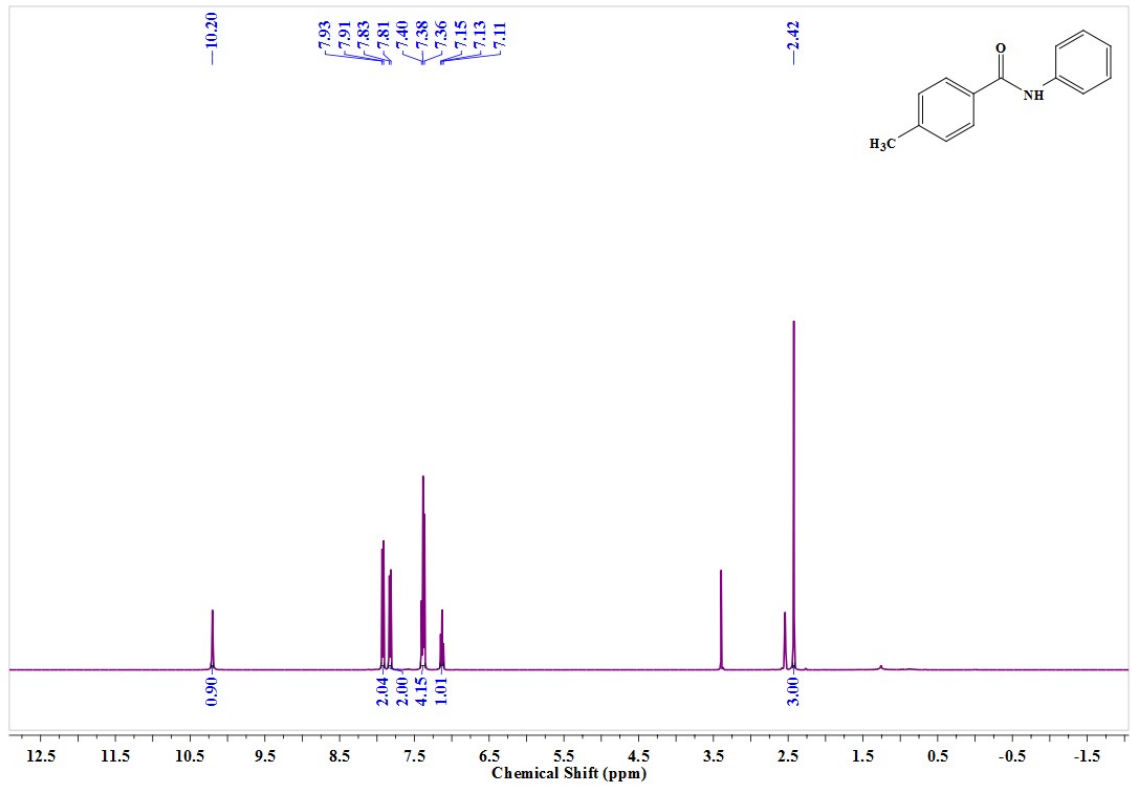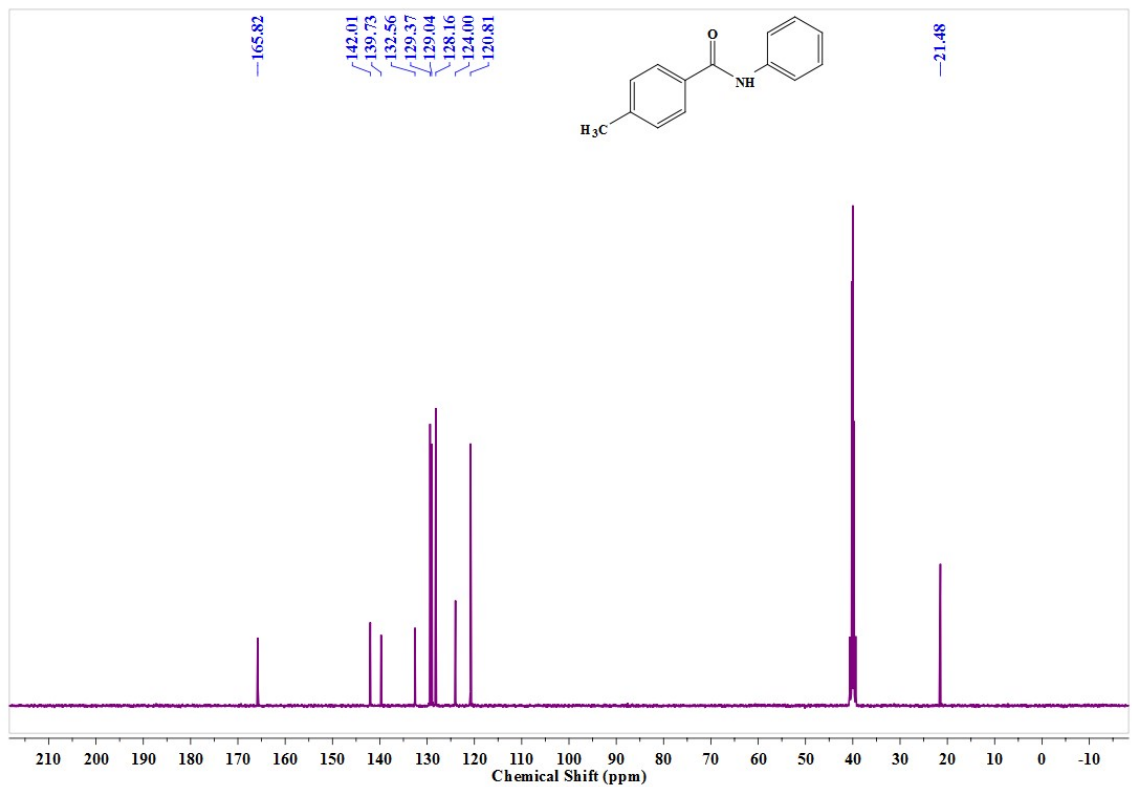

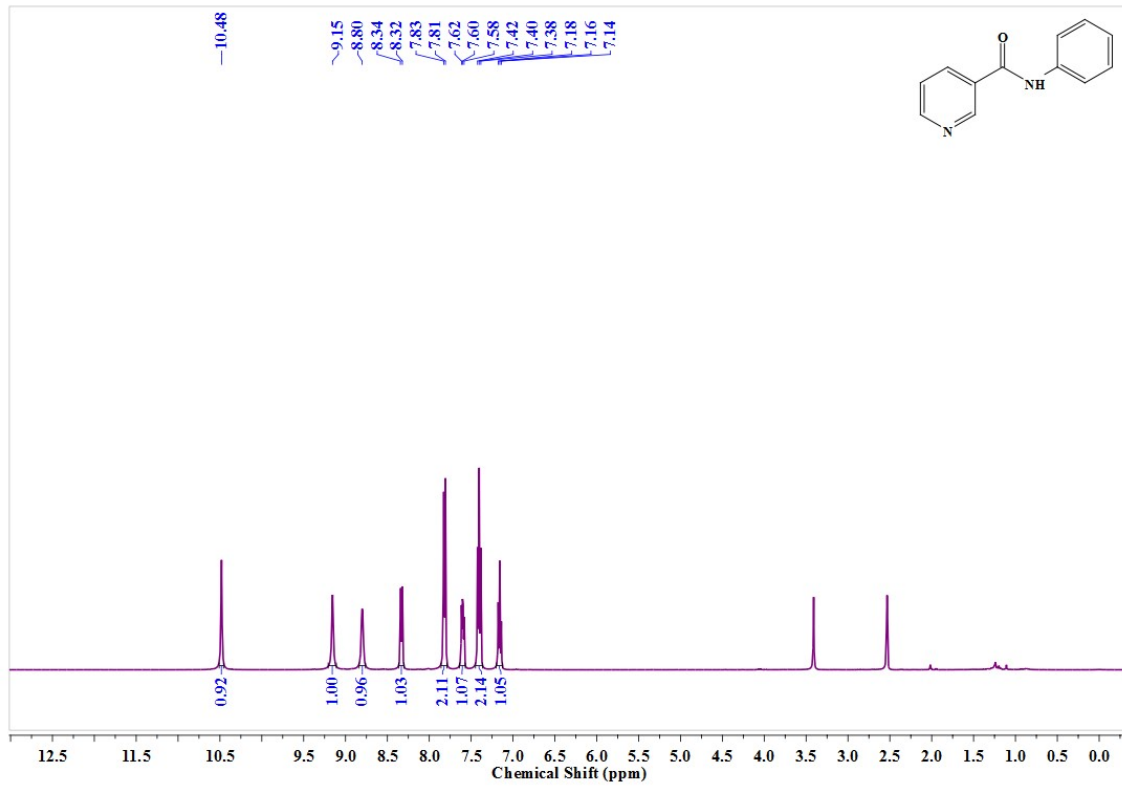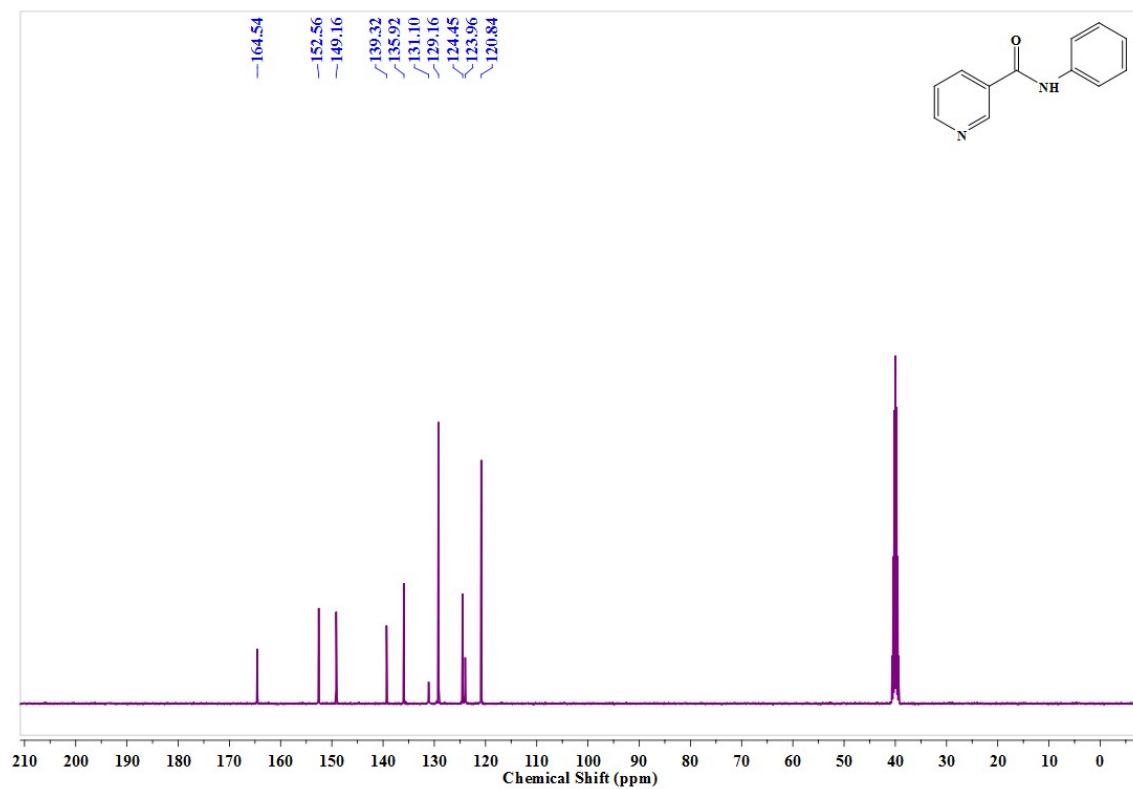

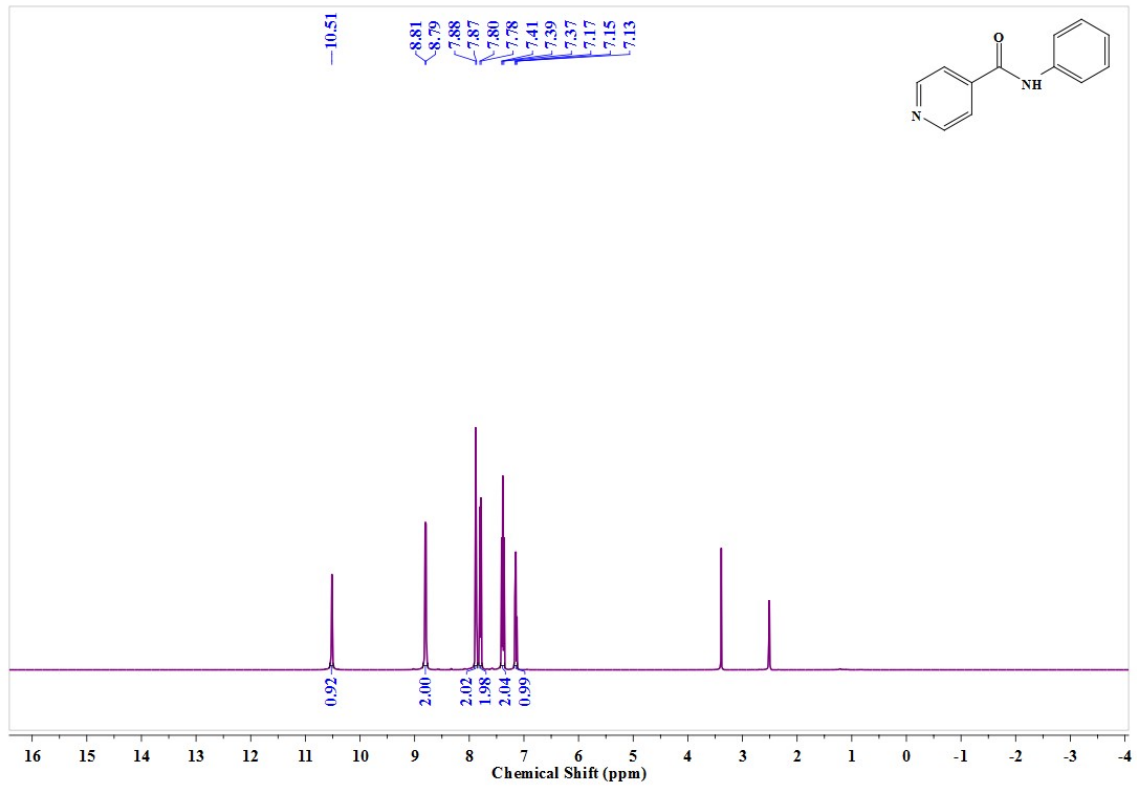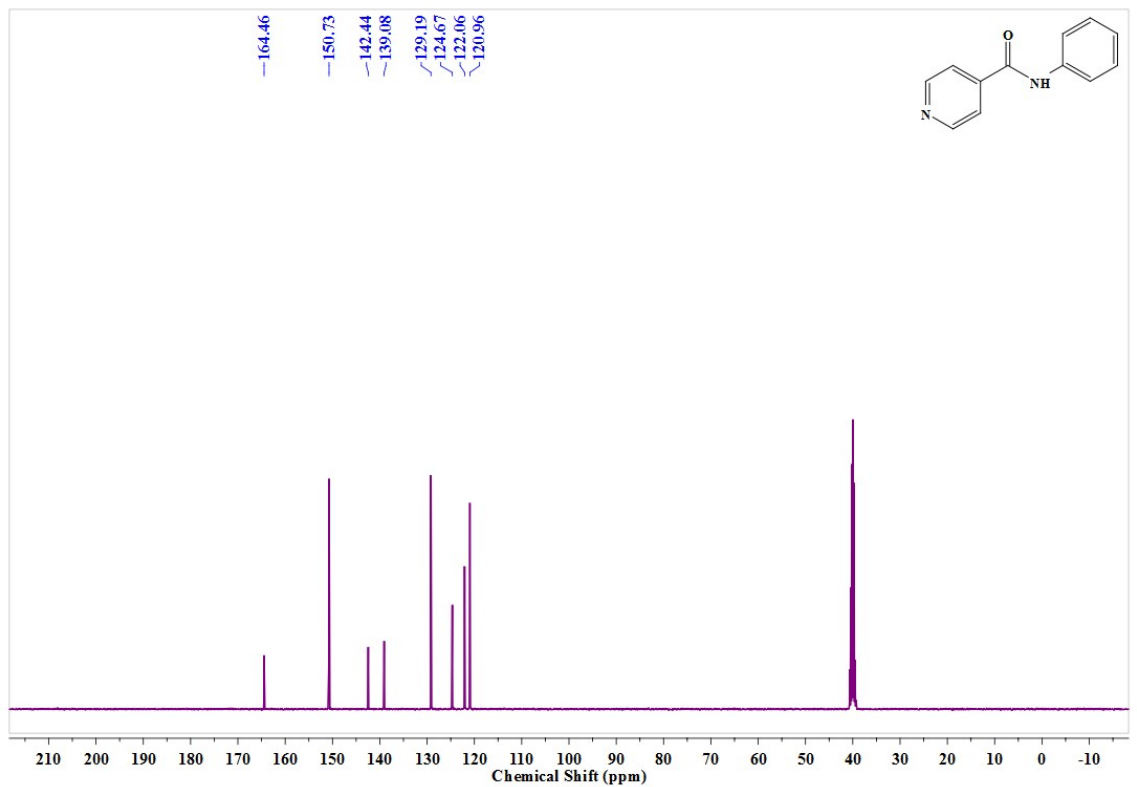



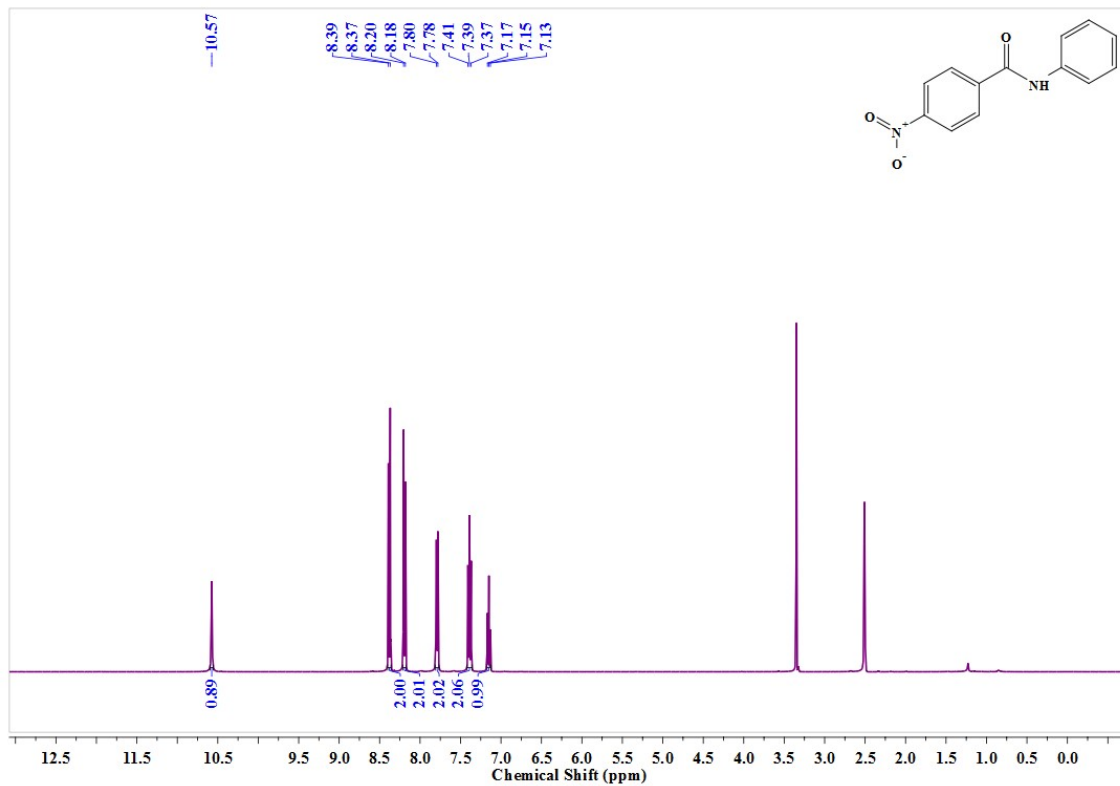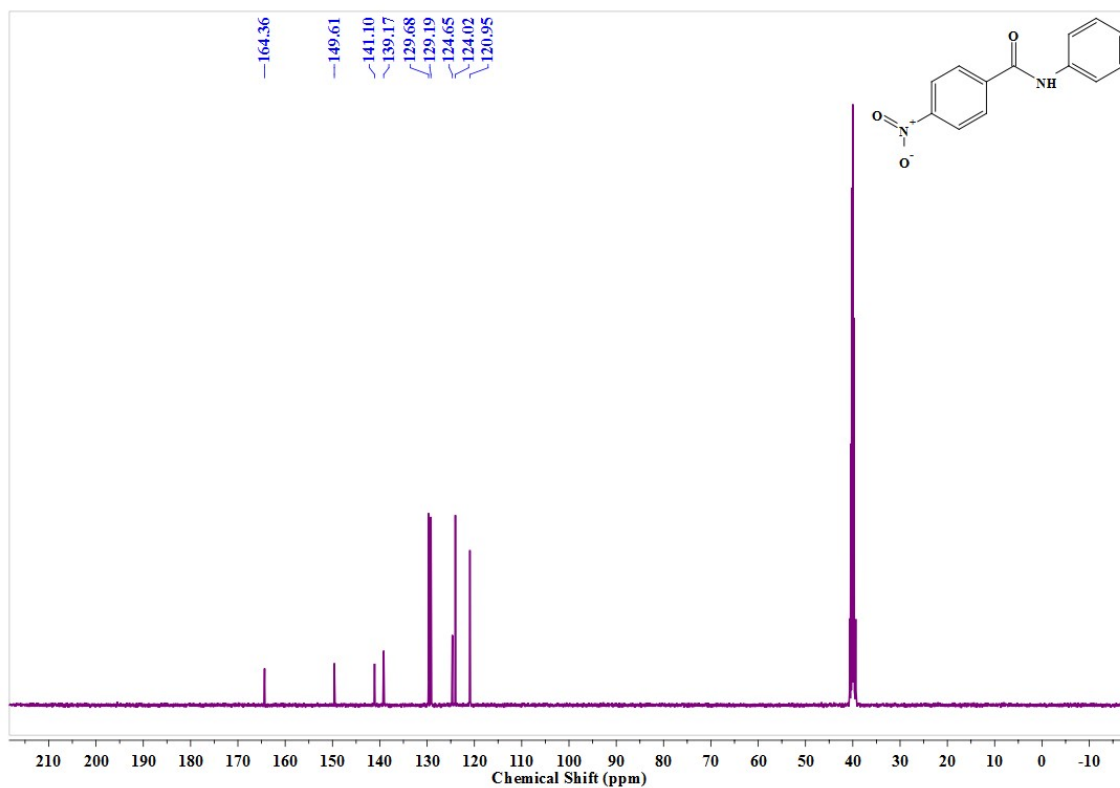

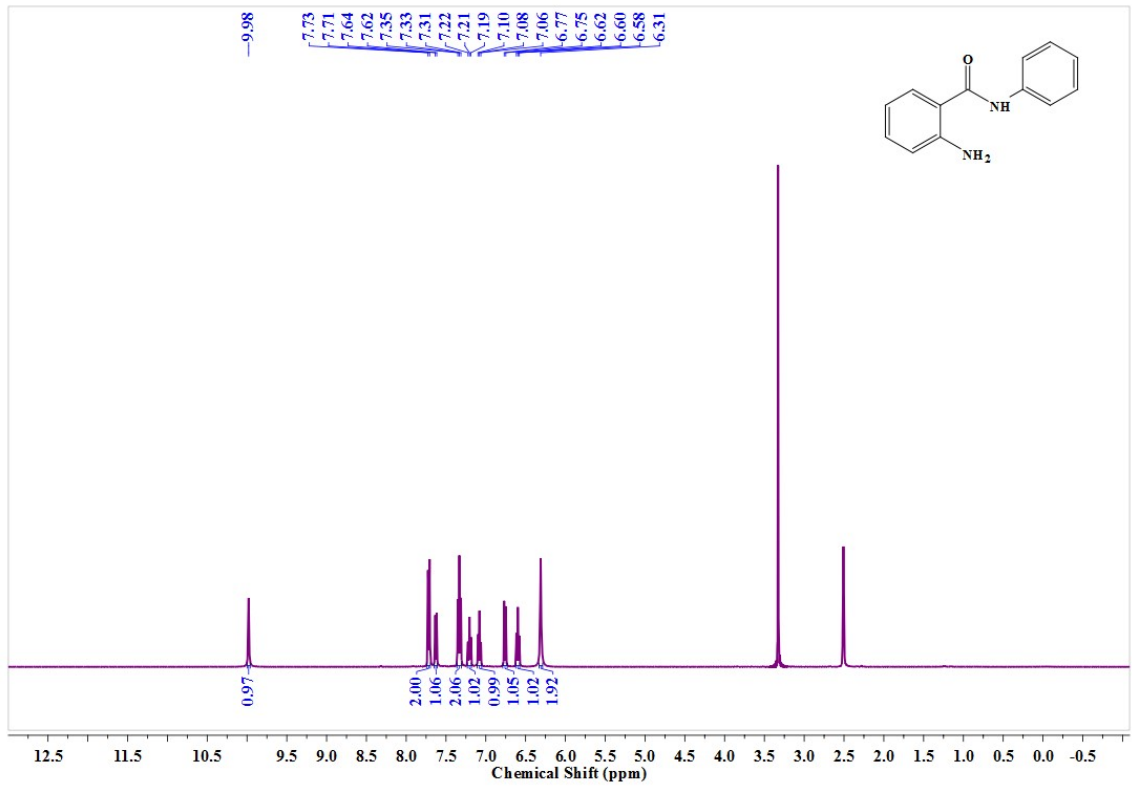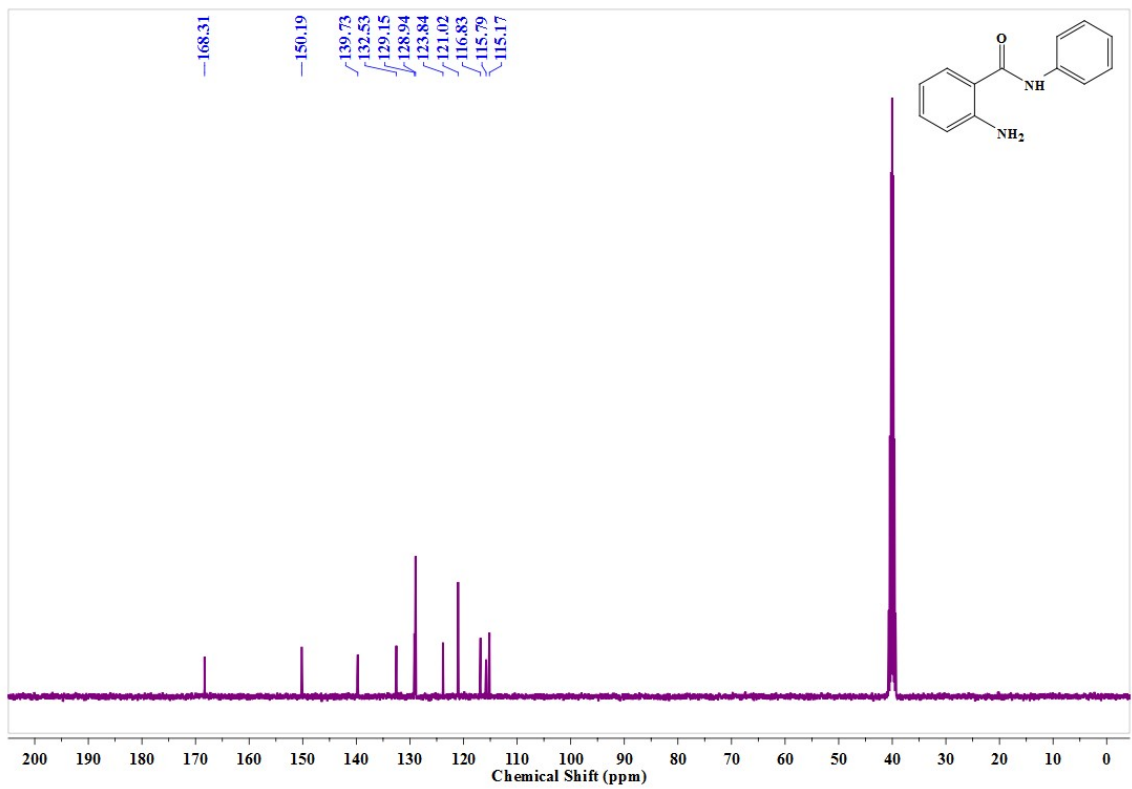

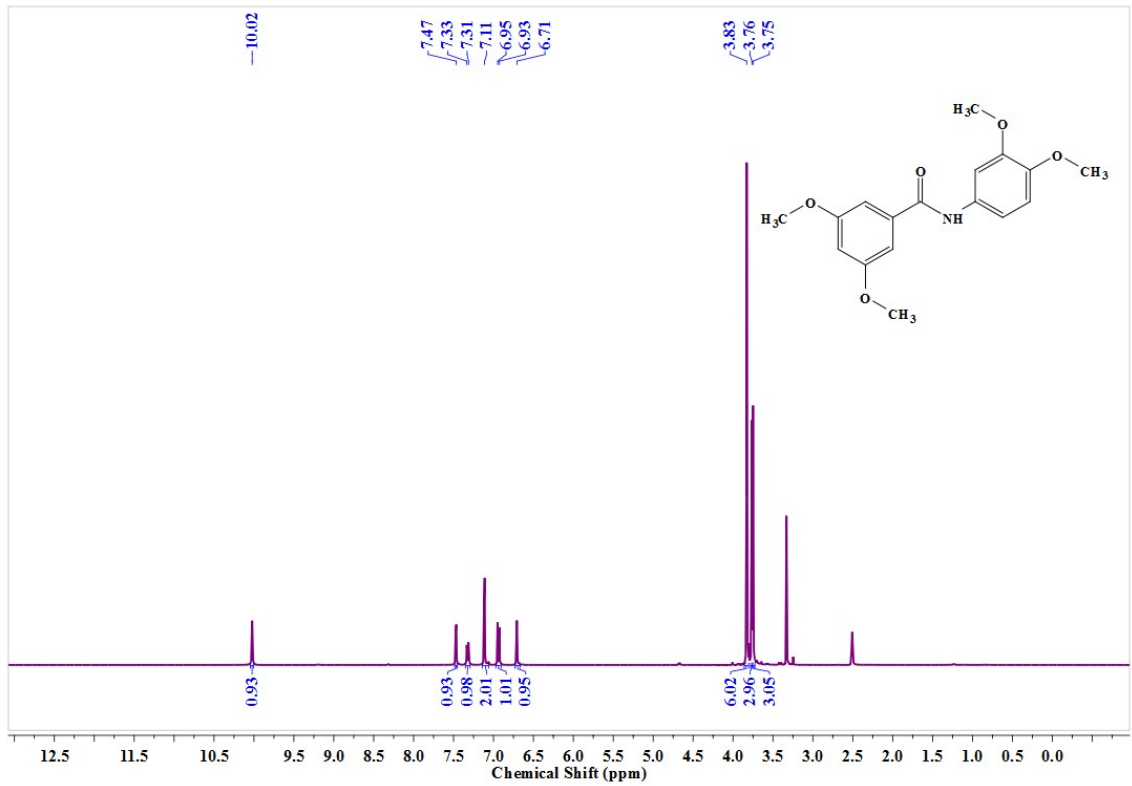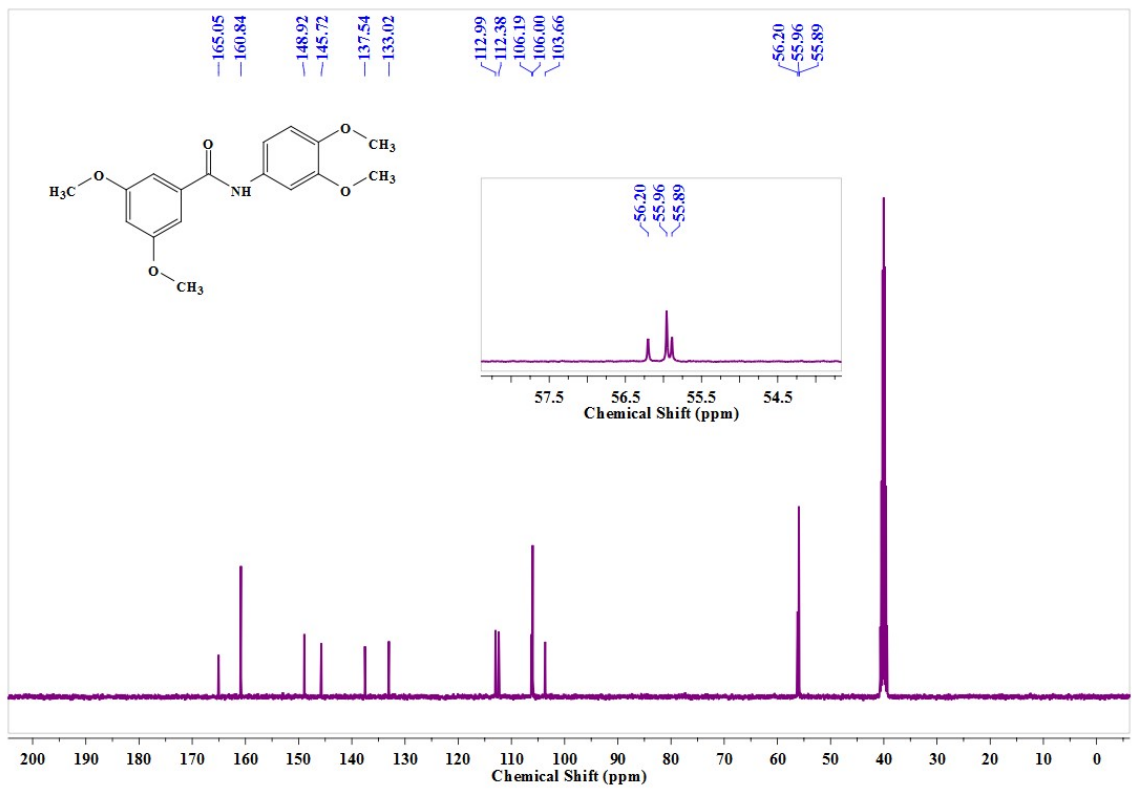

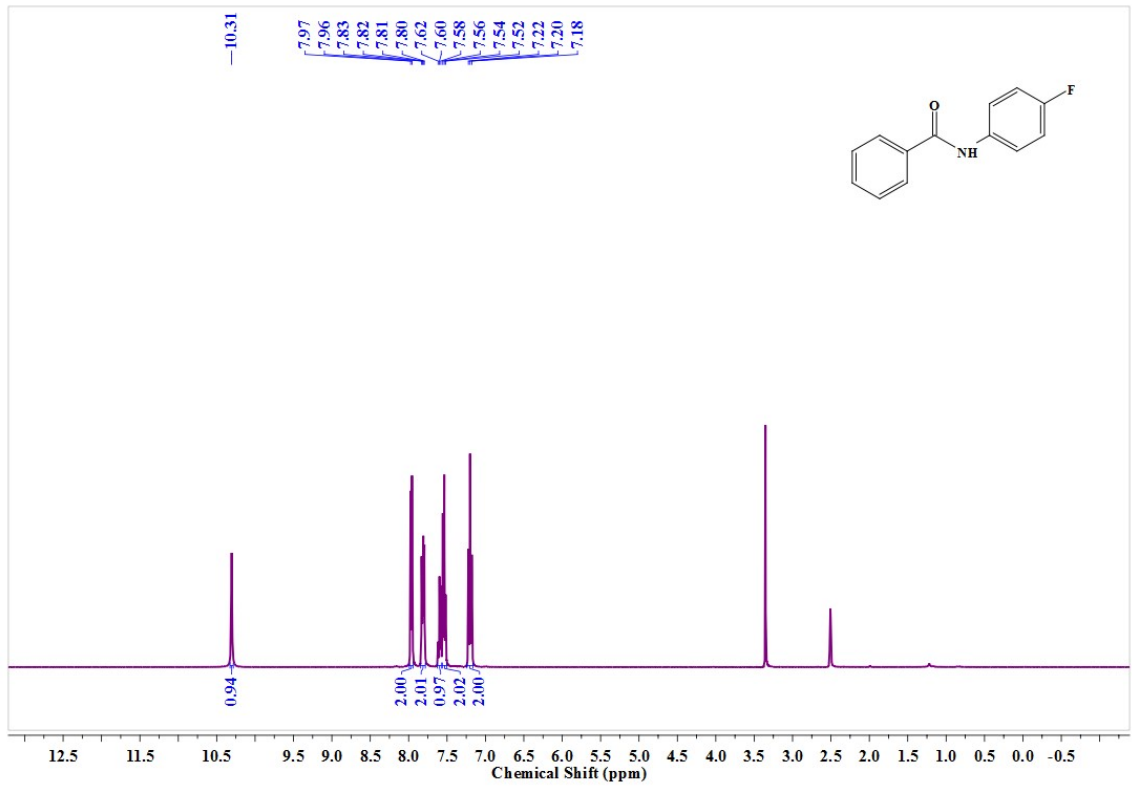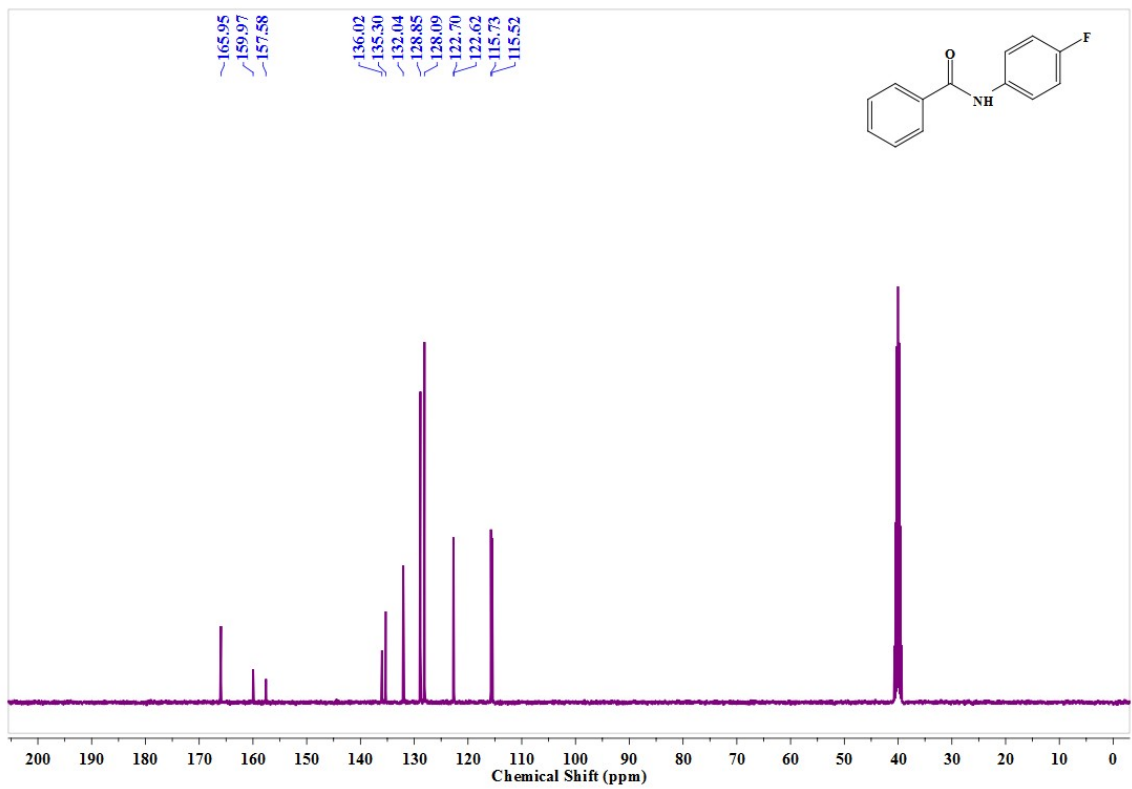

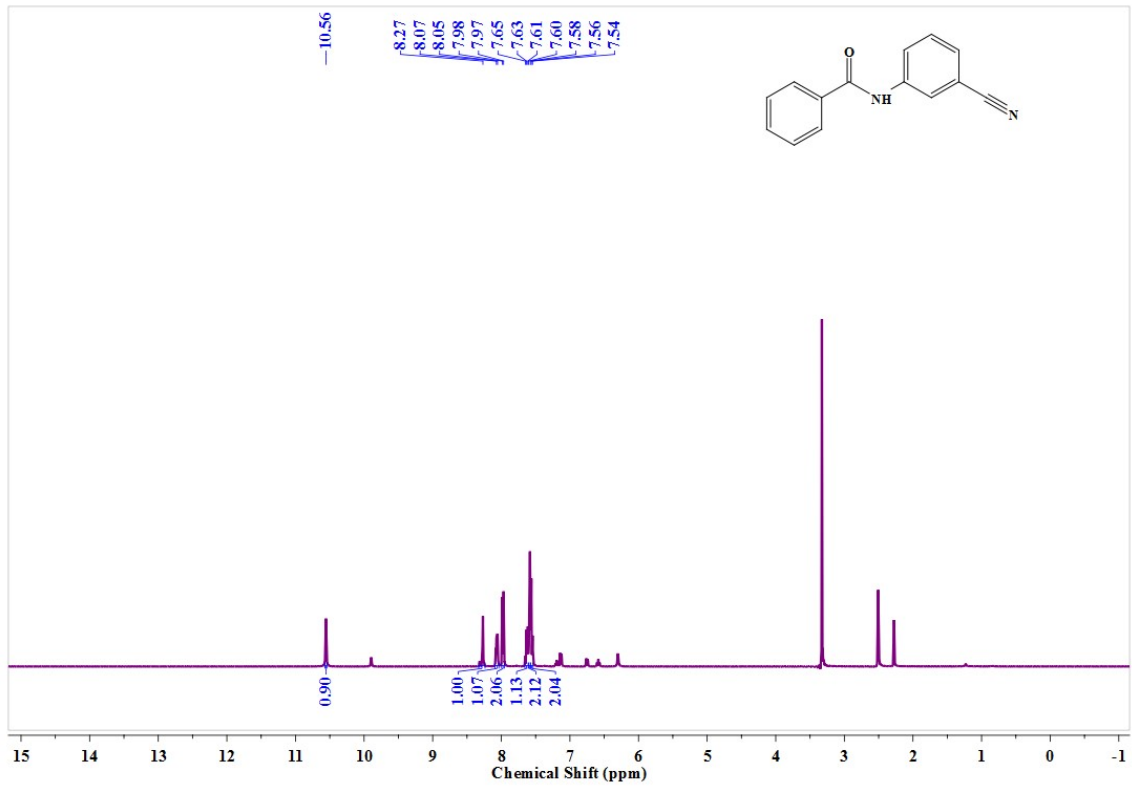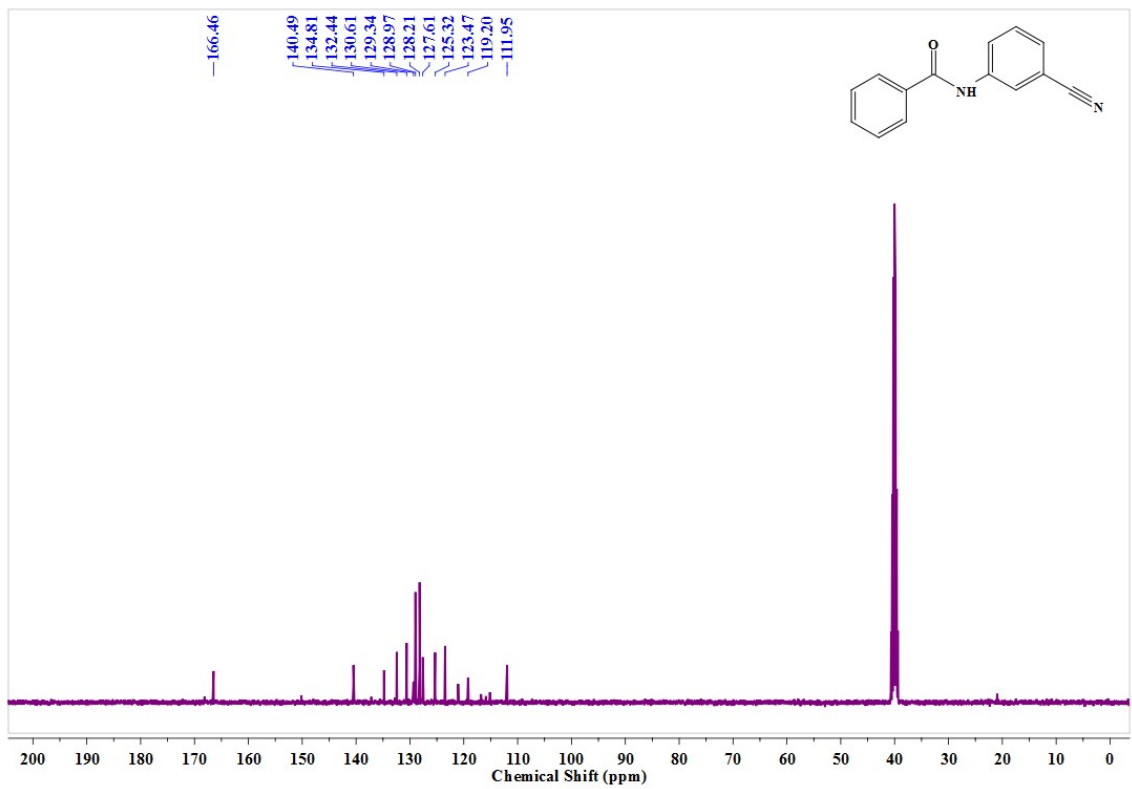

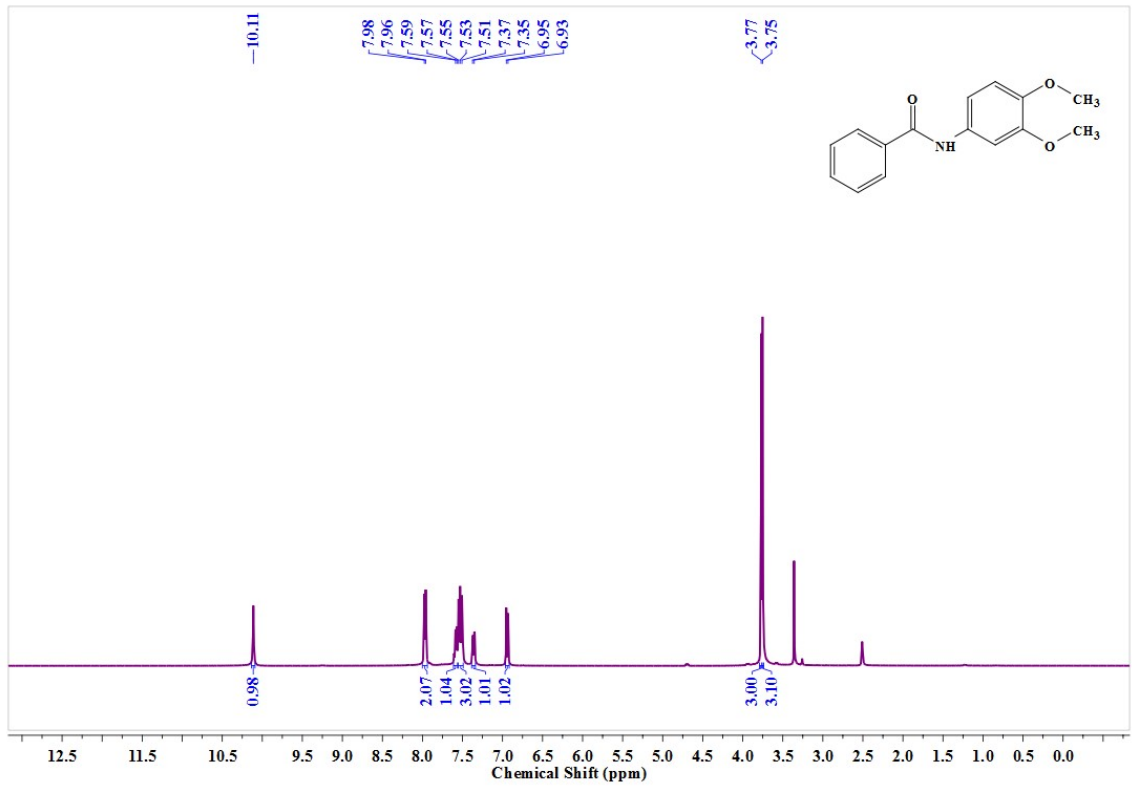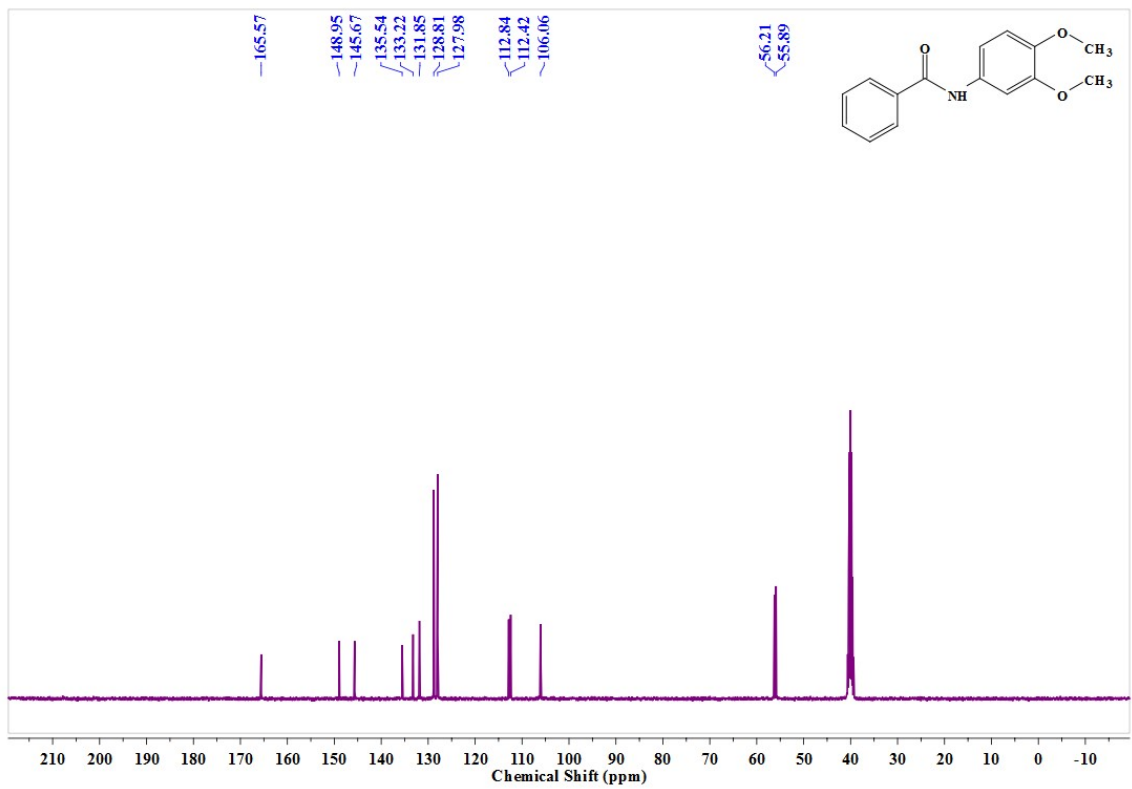

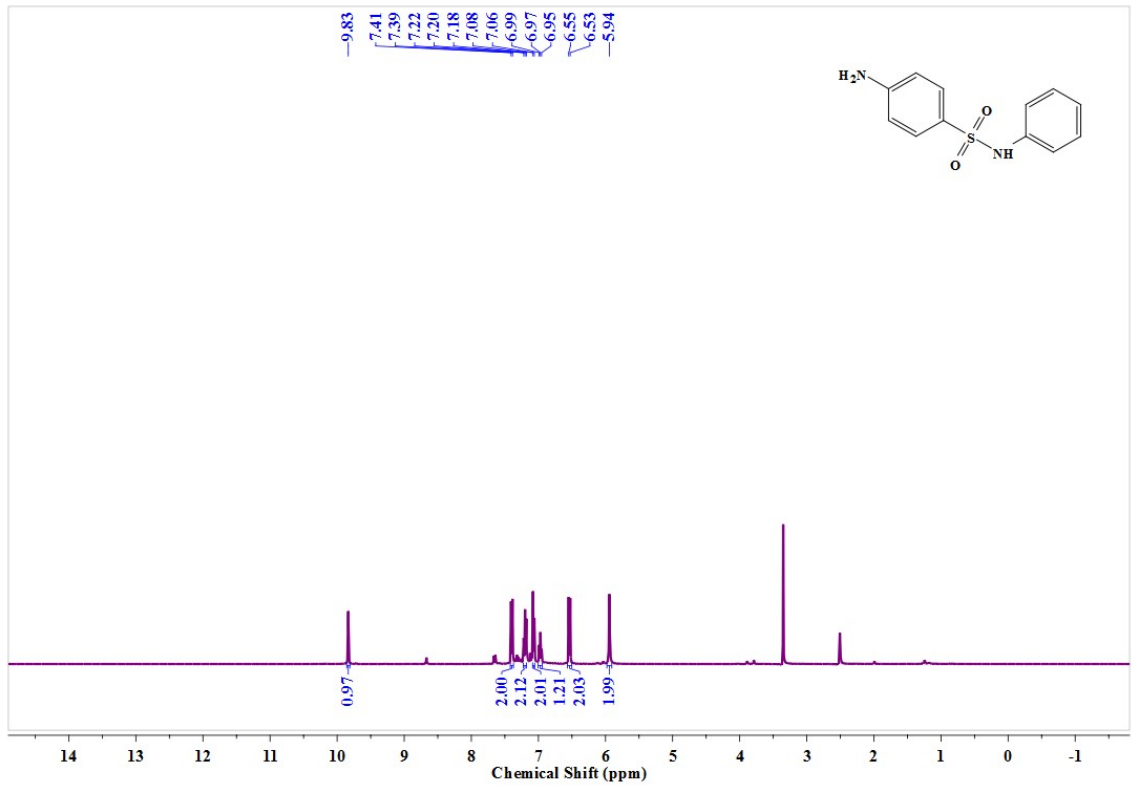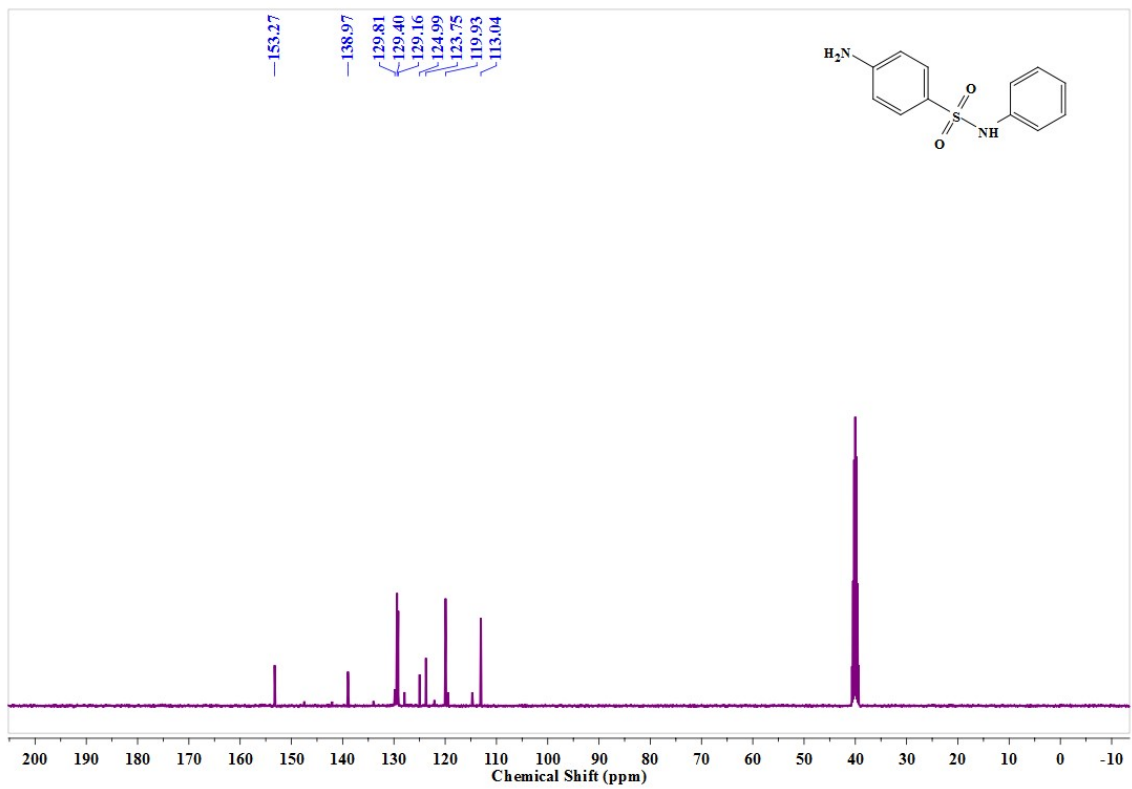

#### 4.4 $^1\text{H}$ and $^{13}\text{C}$ NMR spectra of **9a** and **9b**

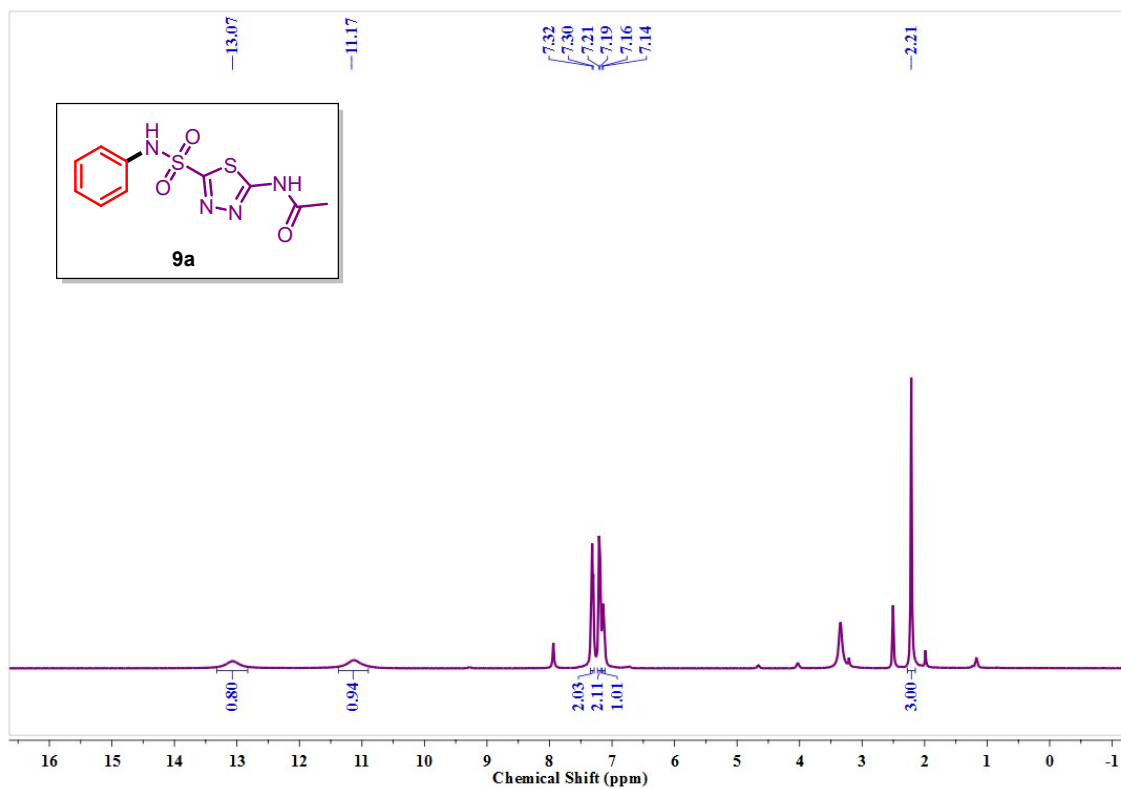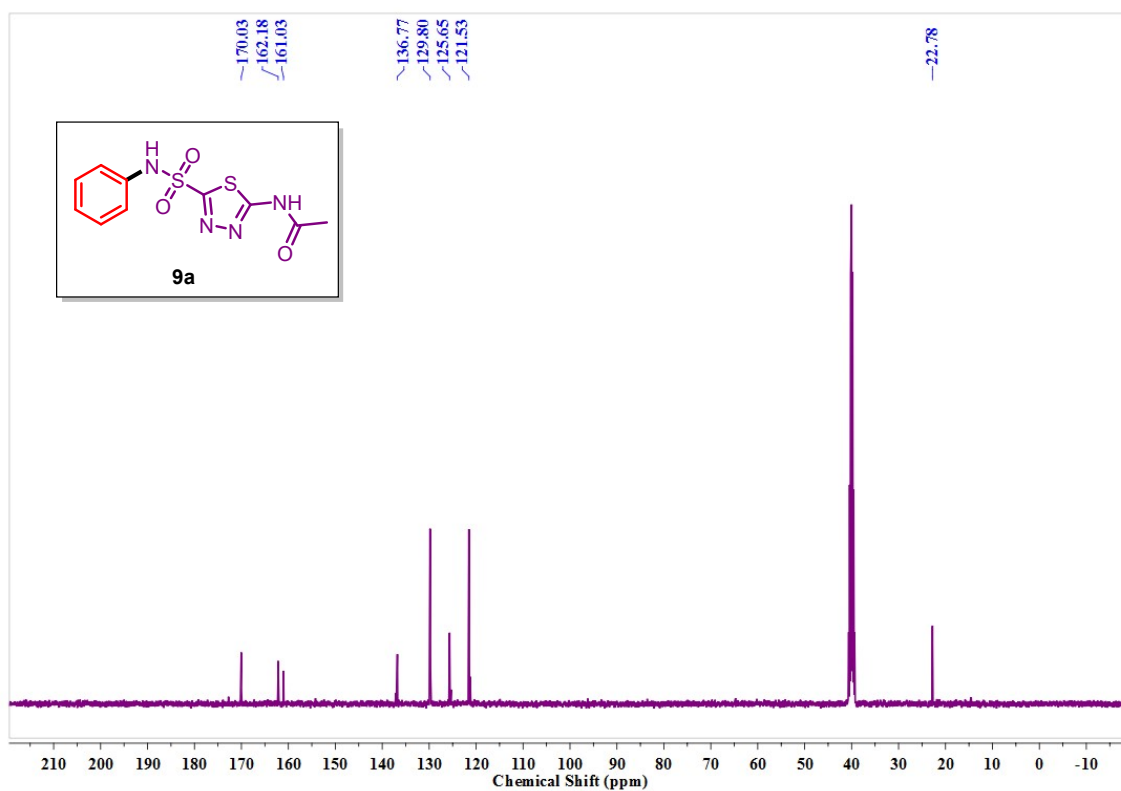



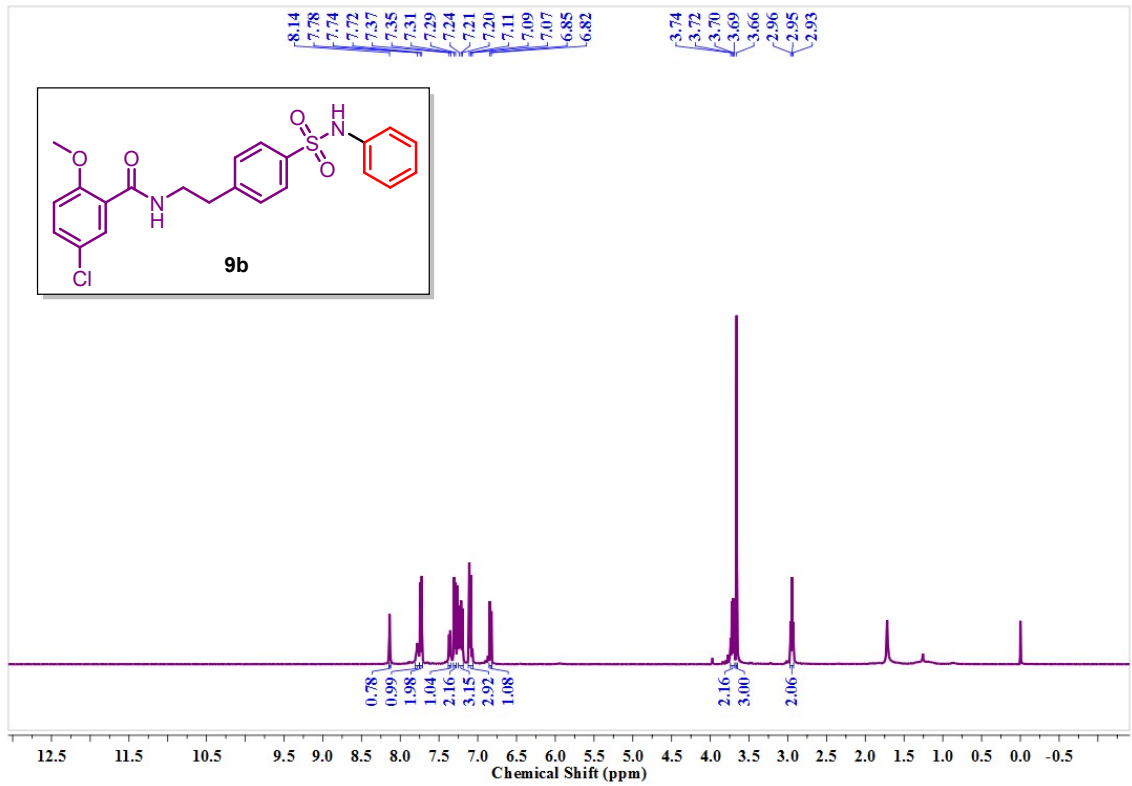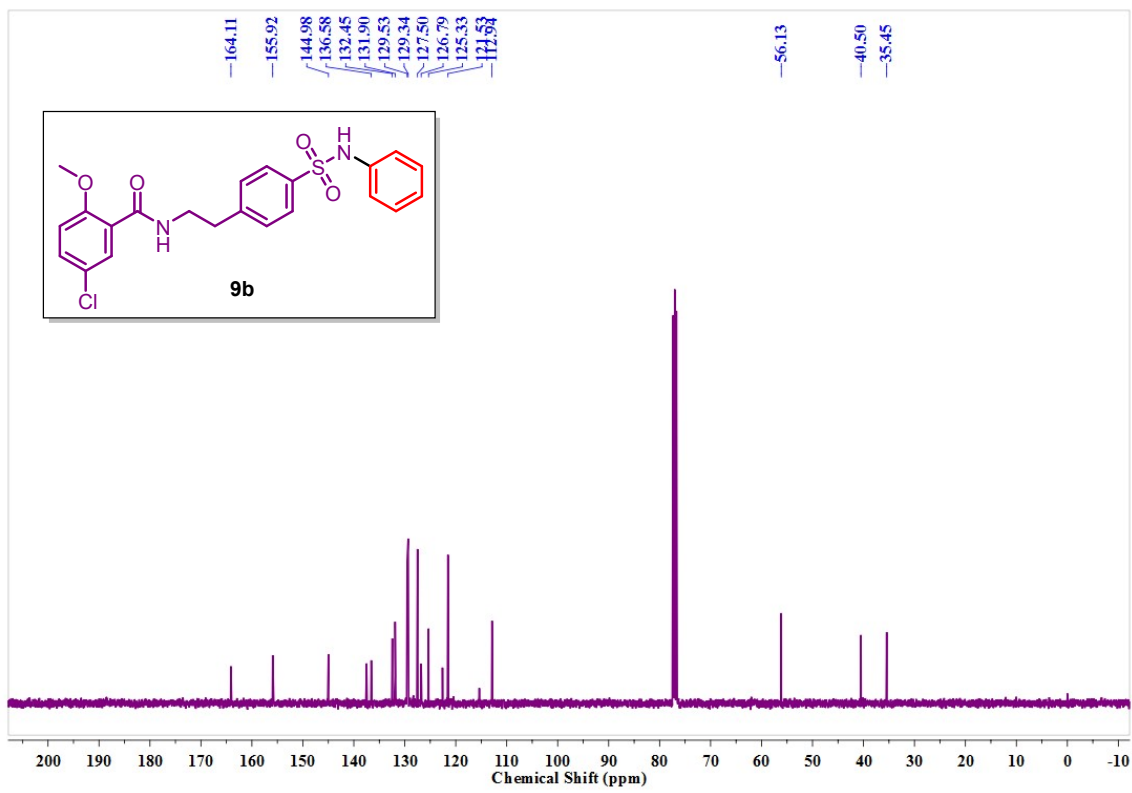

Supplement: d3ob00176h1.pdf [file d3ob00176h1.pdf]
